# Supplementary material for: RNA sequencing of blood in coronary artery disease: involvement of regulatory T cell imbalance
Source: PubMed Central journal article supplement (PMC8414682; doi:10.1186/s12920-021-01062-2), 2021-09-03
Supplement: 12920_2021_1062_MOESM2_ESM.pdf [file 12920_2021_1062_MOESM2_ESM.pdf]

**Supplementary Table 1.**

#Entitylist : RPKM>0.01 70%

#Interpretation : LMH 96 NOTE: this list has all 96 curated samples

#Experiment: CDX96v1

198 total transcripts

#corrected p-value cut-off:0.001

169 unique non-redundant transcripts

#Selected Test : Oneway ANOVA

#p-value computation: Asymptotic

#Multiple Testing Correction: No Correction

KEY: association with CAD or cardiovascular parameters  
 potential involvement in Treg function or differentiation  
 centrosome related

| GeneName   | p        | Log2 Normalized |             |                     |        | Symbol | Description | RefSeq                                                            |
|------------|----------|-----------------|-------------|---------------------|--------|--------|-------------|-------------------------------------------------------------------|
|            |          | FC ([HIGH]      | Regulat     | FC ([MID] vs Regula | [HIGH] |        |             |                                                                   |
| uc061drv.1 | 2.93E-04 | 1.01 up         | -4.97 down  | -1.24               | -1.25  | -3.56  | A1BG        | alpha-1-B glycoprotein (A1BG), mRNA. (from RefSec NM_130786       |
| uc057ilc.1 | 5.27E-04 | 1.86 up         | -5.43 down  | -1.85               | -2.75  | -5.19  | ABCA4       | ATP-binding cassette, sub-family A (ABC1), member NM_000350       |
| uc003wjo.3 | 4.56E-04 | -1.25 down      | -1.29 down  | 0.77                | 1.09   | 0.72   | ABCF2       | ATP-binding cassette, sub-family F (GCN20), member NM_005692      |
| uc064bvu.1 | 9.54E-04 | -1.16 down      | -3.83 down  | 0.03                | 0.24   | -1.70  | AC099342.1  | uncharacterized LOC101927769, long non-coding RNA NR_110117       |
| uc059xhj.1 | 3.89E-04 | -1.24 down      | -1.75 down  | 1.44                | 1.74   | 0.94   | ADAT1       | adenosine deaminase, tRNA-specific 1 (ADAT1), trar NM_012091      |
| uc021xqj.2 | 3.37E-04 | -1.74 down      | -1.70 down  | -2.79               | -2.00  | -2.76  | ADH7        | alcohol dehydrogenase 7 (class IV), mu or sigma pol NM_0011665    |
| uc063bvy.1 | 4.06E-07 | 1.50 up         | -11.42 down | -2.18               | -2.77  | -6.29  | AHRR        | aryl-hydrocarbon receptor repressor (AHRR), transc NM_0012424     |
| uc063bvz.1 | 9.62E-05 | -1.25 down      | -7.08 down  | -0.12               | 0.20   | -2.62  | AHRR        | aryl-hydrocarbon receptor repressor (AHRR), transc NM_0012424     |
| uc062jar.1 | 3.44E-04 | -1.28 down      | -1.40 down  | -1.82               | -1.46  | -1.95  | ALS2CL      | ALS2 C-terminal like NR_033815                                    |
| uc064mjf.1 | 8.03E-04 | -1.24 down      | -1.42 down  | -1.50               | -1.18  | -1.69  | AP3M2       | adaptor-related protein complex 3, mu 2 subunit (AP3 NM_006803    |
| uc001mdb.4 | 7.45E-04 | -1.29 down      | -1.35 down  | -1.09               | -0.72  | -1.15  | APBB1       | amyloid beta (A4) precursor protein-binding, family B, NM_001164  |
| uc001mdc.3 | 4.90E-04 | -1.29 down      | -1.39 down  | -0.93               | -0.56  | -1.04  | APBB1       | amyloid beta (A4) precursor protein-binding, family B, NM_145689  |
| uc057yvj.1 | 3.32E-04 | -1.32 down      | -1.39 down  | -1.00               | -0.60  | -1.07  | APBB1       | amyloid beta (A4) precursor protein-binding, family B, NM_001164  |
| uc057yjj.1 | 9.37E-04 | -1.29 down      | -1.34 down  | -1.11               | -0.74  | -1.16  | APBB1       | amyloid beta (A4) precursor protein-binding, family B, NM_001164  |
| uc057ykd.1 | 1.32E-04 | -1.57 down      | -1.35 down  | -1.81               | -1.16  | -1.59  | APBB1       | amyloid beta (A4) precursor protein-binding, family B, NM_0012573 |
| uc062dsw.1 | 6.45E-04 | 1.01 up         | -3.95 down  | -2.77               | -2.78  | -4.76  | APOL4       | apolipoprotein L, 4 (APOL4), transcript variant a, mRN NM_030643  |
| uc064snu.1 | 5.81E-04 | -1.64 down      | -5.31 down  | -3.71               | -3.00  | -5.41  | APTX        | aprataxin NR_036576                                               |
| uc064soc.1 | 7.40E-04 | 1.10 up         | -4.11 down  | -0.82               | -0.96  | -3.00  | APTX        | aprataxin NR_036577                                               |
| uc065ahz.1 | 7.23E-04 | -1.34 down      | -1.45 down  | -0.51               | -0.09  | -0.62  | ARMCX6      | armadillo repeat containing, X-linked 6 (ARMCX6), tra NM_0011847  |
| uc064pgy.1 | 3.53E-04 | -3.10 down      | -1.70 down  | -2.19               | -0.56  | -1.33  | AZIN1-AS1   | AZIN1 antisense RNA 1 NR_126339                                   |
| uc059ulu.1 | 5.07E-04 | -1.57 down      | -2.22 down  | -0.71               | -0.06  | -1.21  | BBS2        | Bardet-Biedl syndrome 2 (BBS2), mRNA. (from RefS NM_031885        |
| uc061wwa.1 | 6.36E-04 | -1.44 down      | -1.39 down  | -0.29               | 0.24   | -0.23  | BLCAP       | bladder cancer associated protein (BLCAP), transcript NM_0011678  |
| uc058bon.1 | 8.72E-04 | -1.47 down      | -1.32 down  | 1.12                | 1.68   | 1.28   | C11orf31    | chromosome 11 open reading frame 31 (C11orf31), r NM_170746       |
| uc059tos.1 | 3.30E-04 | -1.19 down      | -1.47 down  | -1.01               | -0.77  | -1.33  | C16orf58    | chromosome 16 open reading frame 58 (C16orf58), r NM_022744       |
| uc063kor.1 | 2.91E-04 | -1.42 down      | -6.18 down  | -2.22               | -1.71  | -4.34  | C5ORF60     | chromosome 5 open reading frame 60 NR_131066                      |
| uc063nqr.1 | 3.79E-04 | 1.29 up         | -3.35 down  | -5.67               | -6.04  | -7.78  | C6orf10     | chromosome 6 open reading frame 10 (C6orf10), trar NM_0012864     |
| uc064rtg.1 | 4.78E-04 | -1.48 down      | -2.36 down  | -3.80               | -3.23  | -4.47  | CBWD1       | COBW domain containing 1 (CBWD1), transcript vari NM_018491       |
| uc064bwy.1 | 4.66E-04 | -1.67 down      | -1.50 down  | -1.09               | -0.36  | -0.95  | CDCA7L      | cell division cycle associated 7-like (CDCA7L), transc NM_0011273 |
| uc059xrj.1 | 1.45E-04 | -2.97 down      | -8.68 down  | -2.86               | -1.29  | -4.41  | CDH13       | cadherin 13 (CDH13), transcript variant 5, mRNA. (fr NM_0012204   |
| uc061mig.1 | 6.28E-04 | -1.21 down      | -3.99 down  | -2.78               | -2.50  | -4.49  | CHST10      | carbohydrate sulfotransferase 10 (CHST10), mRNA. NM_004854        |
| uc062hvi.1 | 4.91E-04 | -1.33 down      | -1.24 down  | -0.09               | 0.33   | 0.01   | CNOT10      | CCR4-NOT transcription complex subunit 10 NR_046352               |
| uc064rqz.1 | 8.12E-04 | -1.46 down      | -1.57 down  | 0.09                | 0.64   | -0.01  | COMMD5      | COMM domain containing 5 (COMMD5), transcript v: NM_0010810       |

|            |          |            |            |       |       |       |           |                                                                             |
|------------|----------|------------|------------|-------|-------|-------|-----------|-----------------------------------------------------------------------------|
| uc057ugl.1 | 8.07E-04 | -1.22 down | -1.81 down | -0.50 | -0.20 | -1.06 | COMTD1    | catechol-O-methyltransferase domain containing 1 (C NM_144589               |
| uc001tyn.4 | 6.14E-04 | -1.43 down | -1.01 down | 0.12  | 0.64  | 0.63  | COQ5      | coenzyme Q5 homolog, methyltransferase (S. cerevi NM_032314                 |
| uc062lwg.1 | 6.59E-04 | -1.37 down | -1.47 down | 1.17  | 1.63  | 1.07  | CPOX      | coproporphyrinogen oxidase (CPOX), mRNA. (from FNM_000097                   |
| uc010rgn.2 | 7.67E-04 | -1.20 down | -1.19 down | 0.61  | 0.88  | 0.62  | CRY2      | cryptochrome circadian clock 2 (CRY2), transcript v <sub>ε</sub> NM_021117  |
| uc058ato.1 | 7.22E-04 | -1.20 down | -1.19 down | 0.61  | 0.88  | 0.62  | CRY2      | cryptochrome circadian clock 2 (CRY2), transcript v <sub>ε</sub> NM_021117  |
| uc057oir.1 | 8.16E-04 | -1.23 down | -1.54 down | -0.56 | -0.26 | -0.89 | CSRP1     | cysteine-rich protein NM_0011935                                            |
| uc062ukk.1 | 9.07E-04 | -1.21 down | -1.51 down | 0.16  | 0.43  | -0.16 | CTBP1     | C-terminal binding protein 1 (CTBP1), transcript varia NM_0010126           |
| uc059zqi.1 | 7.57E-04 | -1.56 down | -1.90 down | -0.89 | -0.25 | -1.17 | CTNS      | cystinosis, lysosomal cystine transporter (CTNS), tr <sub>ε</sub> NM_004937 |
| uc057jkc.1 | 6.37E-04 | -1.26 down | -1.51 down | -0.35 | -0.02 | -0.61 | CTTNBP2NL | CTTNBP2 N-terminal like (CTTNBP2NL), mRNA. (frc NM_018704                   |
| uc061otq.1 | 1.03E-04 | -1.47 down | -1.41 down | -0.17 | 0.38  | -0.11 | CYTIP     | cytohesin 1 interacting protein (CYTIP), mRNA. (from NM_004288              |
| uc058mlq.1 | 8.52E-04 | -1.44 down | -2.37 down | -1.71 | -1.19 | -2.43 | DDX11     | DEAD/H (Asp-Glu-Ala-Asp/His) box helicase 11 (DD. NM_0012571                |
| uc060zfv.1 | 6.81E-04 | -1.12 down | -1.47 down | 0.64  | 0.81  | 0.26  | DEDD2     | death effector domain containing 2 NR_073051                                |
| uc021wlp.2 | 9.01E-05 | -1.52 down | -1.48 down | -0.18 | 0.43  | -0.14 | DGCR8     | DGCR8 microprocessor complex subunit (DGCR8), NM_0011903                    |
| uc058pdy.1 | 7.75E-04 | -1.36 down | -1.44 down | -0.26 | 0.18  | -0.34 | DGKA      | diacylglycerol kinase, alpha 80kDa (DGKA), transcript NM_201554             |
| uc062jfe.1 | 3.85E-04 | -1.73 down | -1.44 down | -0.46 | 0.34  | -0.19 | DHX30     | DEAH (Asp-Glu-Ala-His) box helicase 30 (DHX30), tr NM_138615                |
| uc059kmk.1 | 4.82E-04 | -2.99 down | -1.26 down | -2.79 | -1.21 | -1.55 | DIS3L     | DIS3 like exosome 3'-5' exoribonuclease (DIS3L), tra NM_133375              |
| uc062seb.1 | 9.10E-04 | -1.18 down | -1.57 down | -1.66 | -1.41 | -2.06 | DLG1      | discs, large homolog 1 (Drosophila) (DLG1), transcript NM_0012043           |
| uc061cxr.1 | 2.49E-05 | -1.50 down | -6.34 down | -3.46 | -2.87 | -5.54 | DNAAF3    | dynein, axonemal, assembly factor 3 (DNAAF3), tran NM_0012567               |
| uc010wnn.2 | 3.37E-04 | -1.32 down | -1.17 down | 3.12  | 3.52  | 3.30  | DYNLL2    | dynein, light chain, LC8-type 2 (DYNLL2), mRNA. (frc NM_080677              |
| uc059soq.1 | 5.83E-04 | 1.01 up    | -1.45 down | 1.38  | 1.36  | 0.82  | EIF3CL    | eukaryotic translation initiation factor 3, subunit C-like NM_0010996       |
| uc002gnz.5 | 8.23E-04 | -1.36 down | -1.26 down | -0.62 | -0.18 | -0.52 | ELAC2     | elaC ribonuclease Z 2 NM_018127                                             |
| uc057gll.1 | 5.73E-04 | -1.73 down | -1.27 down | -0.12 | 0.68  | 0.34  | EPS15     | epidermal growth factor receptor pathway substrate NM_001981                |
| uc059fov.1 | 8.33E-04 | -1.40 down | -4.19 down | -3.11 | -2.62 | -4.69 | EXOC3L4   | exocyst complex component 3-like 4 (EXOC3L4), mF NM_0010775                 |
| uc060vkb.1 | 8.37E-04 | -1.47 down | -1.39 down | -0.54 | 0.02  | -0.45 | FAM129C   | family with sequence similarity 129, member C (FAM. NM_0010985              |
| uc057bod.1 | 6.86E-05 | -2.70 down | -5.95 down | -5.93 | -4.49 | -7.07 | FAM213B,  | family with sequence similarity 213, member B (FAM <sub>2</sub> NM_152371   |
| uc061fvb.1 | 6.86E-05 | -2.70 down | -5.95 down | -5.93 | -4.49 | -7.07 | FAM213B,  | family with sequence similarity 213, member B (FAM <sub>2</sub> NM_152371   |
| uc064tfh.1 | 7.56E-04 | -2.00 down | -2.97 down | -3.90 | -2.90 | -4.47 | FAM95B1,  | family with sequence similarity 95, member B1 (FAM <sub>9</sub> NM_026759   |
| uc060std.1 | 7.00E-04 | 1.21 up    | -6.37 down | -2.71 | -2.99 | -5.66 | FBN3      | fibrillin 3 (FBN3), mRNA. (from RefSeq NM_032447) NM_032447                 |
| uc058fep.1 | 6.63E-04 | -1.37 down | -1.52 down | -0.02 | 0.43  | -0.18 | FCHSD2    | FCH and double SH3 domains 2 (FCHSD2), mRNA. (NM_014824                     |
| uc064glm.1 | 5.34E-04 | -1.41 down | -1.39 down | 0.90  | 1.40  | 0.92  | FIS1      | fission 1 (mitochondrial outer membrane) homolog (S NM_016068               |
| uc003djj.3 | 8.46E-04 | -1.23 down | -1.33 down | -0.49 | -0.18 | -0.59 | FLNB      | filamin B, beta (FLNB), transcript variant 2, mRNA. (fr NM_001457           |
| uc010hnf.3 | 7.92E-04 | -1.24 down | -1.33 down | -0.48 | -0.17 | -0.59 | FLNB      | filamin B, beta (FLNB), transcript variant 4, mRNA. (fr NM_0011643          |
| uc064mrv.1 | 3.41E-04 | -1.14 down | -1.46 down | 0.25  | 0.44  | -0.11 | FNTA      | farnesyltransferase, CAAX box, alpha (FNTA), trans NM_002027                |
| uc063okh.1 | 1.65E-04 | 1.12 up    | -4.26 down | -1.53 | -1.69 | -3.78 | FOXP4-AS1 | FOXP4 antisense RNA 1 NR_126417                                             |
| uc060atq.1 | 7.87E-04 | -1.33 down | -1.41 down | 1.69  | 2.10  | 1.60  | FXR2      | fragile X mental retardation, autosomal homolog 2 (F> NM_004860             |
| uc004doi.6 | 9.23E-04 | -1.76 down | -5.32 down | -3.91 | -3.10 | -5.51 | GAGE13    | G antigen 2C (GAGE2C), mRNA. (from RefSeq NM_ NM_001472                     |
| uc059yvw.1 | 3.93E-05 | 1.16 up    | -4.34 down | -2.36 | -2.57 | -4.68 | GAS8      | growth arrest-specific 8 (GAS8), transcript variant 4, NM_0012862           |
| uc062dbe.1 | 3.38E-04 | -1.56 down | -3.77 down | -1.37 | -0.73 | -2.64 | GATSL3    | GATS protein-like 3 (GATSL3), mRNA. (from RefSeq NM_0010376                 |
| uc002whp.2 | 8.97E-04 | -1.89 down | -4.43 down | -1.93 | -1.01 | -3.16 | GNRH2     | gonadotropin-releasing hormone 2 (GNRH2), transcr NM_178331                 |
| uc057dtw.1 | 6.14E-04 | -1.51 down | -1.64 down | -0.77 | -0.18 | -0.89 | GPATCH3   | G patch domain containing 3 (GPATCH3), mRNA. (fr NM_022078                  |
| uc059uvj.1 | 5.04E-04 | 1.44 up    | -4.69 down | -4.07 | -4.60 | -6.83 | GPR56     | adhesion G protein-coupled receptor G1 (ADGRG1), NM_0011457                 |
| uc064roh.1 | 8.92E-04 | -1.17 down | -2.68 down | -2.36 | -2.13 | -3.56 | GPT       | glutamic-pyruvate transaminase (alanine aminotransf NM_005309               |
| uc063ixf.1 | 3.23E-04 | -1.84 down | -3.71 down | -4.06 | -3.19 | -5.08 | GRIA1     | glutamate receptor, ionotropic, AMPA 1 (GRIA1), tran NM_0012580             |
| uc002iii.2 | 3.77E-04 | -1.30 down | -1.54 down | -1.01 | -0.64 | -1.26 | HEXIM2    | hexamethylene bis-acetamide inducible 2 NM_0013034                          |
| uc061afd.1 | 8.69E-04 | -1.88 down | -5.50 down | -2.56 | -1.65 | -4.11 | HIF3A     | hypoxia inducible factor 3, alpha subunit (HIF3A), trar NM_152796           |

|            |          |            |             |       |       |       |           |                                                           |            |
|------------|----------|------------|-------------|-------|-------|-------|-----------|-----------------------------------------------------------|------------|
| uc058uor.1 | 8.95E-04 | -1.38 down | -1.34 down  | -0.14 | 0.33  | -0.09 | HIP1R     | huntingtin interacting protein 1 related (HIP1R), transcr | NM_003959  |
| uc061yty.1 | 1.48E-04 | -1.62 down | -1.49 down  | -2.68 | -1.99 | -2.56 | ICOSLG    | inducible T-cell costimulator ligand                      | NM_0012830 |
| uc058pgk.1 | 8.59E-04 | -3.36 down | -3.40 down  | -4.45 | -2.69 | -4.46 | IKZF4     | IKAROS family zinc finger 4 (Eos) (IKZF4), mRNA. (f       | NM_022465  |
| uc063ljh.1 | 9.84E-04 | -1.59 down | -1.63 down  | -0.30 | 0.37  | -0.34 | IRF4      | interferon regulatory factor 4                            | NM_0011952 |
| uc061nqc.1 | 8.13E-04 | -1.31 down | -1.45 down  | -0.04 | 0.35  | -0.19 | IWS1      | IWS1 homolog (S. cerevisiae) (IWS1), mRNA. (from I        | NM_017969  |
| uc063hbv.1 | 5.15E-04 | -1.64 down | -1.58 down  | -0.30 | 0.41  | -0.24 | JADE2     | jade family PHD finger 2 (JADE2), transcript variant 3    | NM_015288  |
| uc062lig.1 | 9.27E-04 | -1.18 down | -3.34 down  | -0.79 | -0.55 | -2.29 | KBTBD8    | kelch repeat and BTB (POZ) domain containing 8 (KE        | NM_032505  |
| uc064zso.1 | 6.27E-04 | -1.32 down | -3.69 down  | -1.29 | -0.89 | -2.78 | KIF4A     | kinesin family member 4A (KIF4A), mRNA. (from Ref:        | NM_012310  |
| uc057ohz.1 | 9.46E-04 | -1.89 down | -4.43 down  | -2.06 | -1.14 | -3.29 | LAD1      | ladinin 1 (LAD1), mRNA. (from RefSeq NM_005558)           | NM_005558  |
| uc063epk.1 | 3.51E-04 | -1.29 down | -4.69 down  | -0.14 | 0.22  | -2.01 | LINC01336 | long intergenic non-protein coding RNA 1336 (LINC0        | NR_126375  |
| uc063ady.1 | 5.93E-04 | -1.34 down | -1.61 down  | 0.19  | 0.61  | -0.07 | LRBA      | LPS-responsive vesicle trafficking, beach and anchor      | NM_006726  |
| uc058kne.1 | 6.65E-04 | -1.52 down | -2.57 down  | -2.24 | -1.64 | -3.00 | LRRC23    | leucine rich repeat containing 23 (LRRC23), transcrip     | NM_006992  |
| uc060ltc.1 | 7.33E-04 | -1.18 down | -1.72 down  | 0.64  | 0.88  | 0.09  | LRRC45    | leucine rich repeat containing 45 (LRRC45), mRNA. (       | NM_144999  |
| uc063ecv.1 | 7.05E-04 | -1.02 down | -3.11 down  | -1.58 | -1.55 | -3.19 | MAST4     | microtubule associated serine/threonine kinase family     | NM_0012902 |
| uc062pue.1 | 5.60E-06 | -1.59 down | -8.01 down  | -5.26 | -4.59 | -7.60 | MECOM     | MDS1 and EVI1 complex locus (MECOM), transcript           | NM_0011050 |
| uc032yik.1 | 4.00E-04 | -1.28 down | -10.06 down | -0.31 | 0.05  | -3.28 | MIR3135B  | microRNA 3135b (MIR3135B), microRNA. (from Ref:           | NR_039668  |
| uc032ytr.1 | 4.00E-04 | -1.28 down | -10.06 down | -0.31 | 0.05  | -3.28 | MIR3135B  | microRNA 3135b (MIR3135B), microRNA. (from Ref:           | NR_039668  |
| uc021uqm.1 | 4.43E-04 | -1.30 down | -24.62 down | -0.88 | -0.50 | -5.12 | MIR3188   | microRNA 3188 (MIR3188), microRNA. (from RefSec           | NR_036155  |
| uc058vgw.1 | 2.07E-04 | -1.69 down | -1.83 down  | -2.04 | -1.28 | -2.15 | MMP17     | matrix metalloproteinase 17 (membrane-inserted) (MM       | NM_016155  |
| uc063sgp.1 | 7.99E-04 | -2.35 down | -6.59 down  | -2.57 | -1.34 | -4.06 | MTHFD1L   | methylenetetrahydrofolate dehydrogenase (NADP+ d          | NM_0012427 |
| uc060ehm.1 | 3.05E-04 | -1.15 down | -4.41 down  | -2.51 | -2.30 | -4.44 | MYO19     | myosin XIX (MYO19), transcript variant 3, mRNA. (fr       | NM_0010335 |
| uc064kqr.1 | 8.65E-04 | -2.37 down | -5.37 down  | -2.71 | -1.46 | -3.89 | NAT1      | N-acetyltransferase 1 (arylamine N-acetyltransferas       | NM_0011601 |
| uc057jyz.1 | 8.12E-04 | -1.42 down | -1.53 down  | -0.50 | 0.01  | -0.60 | NBPF15    | neuroblastoma breakpoint family, member 15 (NBPF          | NR_173638  |
| uc057jza.1 | 3.65E-04 | -1.52 down | -1.63 down  | -0.15 | 0.46  | -0.25 | NBPF15    | neuroblastoma breakpoint family, member 15 (NBPF          | NR_173638  |
| uc061end.1 | 3.17E-04 | -3.02 down | -2.71 down  | -6.16 | -4.57 | -6.01 | NLRP2     | NLR family, pyrin domain containing 2 (NLRP2), trans      | NM_0011740 |
| uc061ctz.1 | 5.74E-04 | -1.21 down | -3.43 down  | -5.62 | -5.34 | -7.12 | NLRP7     | NLR family, pyrin domain containing 7 (NLRP7), trans      | NM_0011272 |
| uc061foc.1 | 5.74E-04 | -1.21 down | -3.43 down  | -5.62 | -5.34 | -7.12 | NLRP7     | NLR family, pyrin domain containing 7 (NLRP7), trans      | NM_0011272 |
| uc061var.1 | 2.61E-04 | -1.38 down | -1.50 down  | 0.02  | 0.49  | -0.10 | NOP56     | NOP56 ribonucleoprotein (NOP56), transcript variant       | NM_006392  |
| uc061mjc.1 | 1.47E-04 | -1.26 down | -4.39 down  | -2.81 | -2.48 | -4.61 | NPAS2     | neuronal PAS domain protein 2 (NPAS2), mRNA. (fro         | NM_002518  |
| uc058cye.1 | 1.93E-04 | 1.08 up    | -1.87 down  | -1.45 | -1.56 | -2.46 | NRXN2     | neurexin 2 (NRXN2), transcript variant beta, mRNA. (      | NM_138734  |
| uc059six.1 | 1.07E-05 | -2.04 down | -1.12 down  | 0.00  | 1.03  | 0.87  | NSMCE1    | non-SMC element 1 homolog (S. cerevisiae) (NSMCE          | NM_145080  |
| uc021txo.2 | 4.75E-06 | -1.86 down | -1.54 down  | -2.28 | -1.39 | -2.00 | NT5C3B    | 5'-nucleotidase, cytosolic IIIB (NT5C3B), transcript v    | NM_052935  |
| uc060fdr.1 | 8.67E-04 | -1.51 down | -1.46 down  | -1.86 | -1.27 | -1.82 | NT5C3B    | 5'-nucleotidase, cytosolic IIIB (NT5C3B), transcript v    | NM_052935  |
| uc061aza.1 | 3.59E-04 | -1.43 down | -2.00 down  | 0.14  | 0.66  | -0.34 | NTF4      | neurotrophin 4 (NTF4), mRNA. (from RefSeq NM_00           | NM_006179  |
| uc062xlo.1 | 2.87E-04 | -1.15 down | -1.54 down  | 1.17  | 1.37  | 0.74  | NUP54     | nucleoporin 54kDa                                         | NR_103781  |
| uc062xlr.1 | 6.18E-04 | -1.26 down | -1.47 down  | -0.24 | 0.09  | -0.46 | NUP54     | nucleoporin 54kDa                                         | NR_103782  |
| uc061bmx.1 | 7.54E-04 | -1.45 down | -1.38 down  | -0.62 | -0.09 | -0.55 | NUP62     | nucleoporin 62kDa (NUP62), transcript variant 1, mR       | NM_153719  |
| uc057jvt.1 | 6.40E-04 | -1.51 down | -1.72 down  | -1.12 | -0.53 | -1.31 | PHGDH     | phosphoglycerate dehydrogenase (PHGDH), mRNA. NM          | 006623     |
| uc064dvi.1 | 1.39E-04 | -1.47 down | -4.86 down  | -2.58 | -2.02 | -4.30 | PHKG1     | phosphorylase kinase, gamma 1                             | NR_047689  |
| uc057xni.1 | 1.96E-04 | -6.37 down | -2.10 down  | -4.38 | -1.71 | -2.78 | PIDD1     | p53-induced death domain protein 1 (PIDD1), transcr       | NM_145887  |
| uc059phr.1 | 1.70E-04 | -1.82 down | -1.62 down  | -1.22 | -0.36 | -1.06 | PKD1      | polycystic kidney disease 1 (autosomal dominant) (P       | NM_000296  |
| uc059rbn.1 | 8.11E-04 | -1.42 down | -1.91 down  | 1.87  | 2.38  | 1.45  | PLA2G10,  | phospholipase A2, group X (PLA2G10), mRNA. (from          | NM_003561  |
| uc062iet.1 | 4.03E-04 | -1.75 down | -1.38 down  | -0.98 | -0.17 | -0.63 | PLCD1     | phospholipase C, delta 1 (PLCD1), transcript variant      | NM_006225  |
| uc061xai.1 | 5.74E-04 | -1.75 down | -1.74 down  | -0.55 | 0.25  | -0.54 | PLCG1     | phospholipase C, gamma 1 (PLCG1), transcript varia        | NM_182811  |
| uc062fel.1 | 1.70E-04 | -1.09 down | -1.65 down  | -1.30 | -1.18 | -1.90 | PPARA     | peroxisome proliferator activated receptor alpha          | NM_0010019 |

|            |          |            |            |       |       |       |            |                                                           |            |
|------------|----------|------------|------------|-------|-------|-------|------------|-----------------------------------------------------------|------------|
| uc063msm.1 | 2.76E-04 | 1.41 up    | 1.21 up    | -0.05 | -0.54 | -0.26 | PPP1R10    | protein phosphatase 1 regulatory subunit 10               | NR_072994  |
| uc063twf.1 | 2.76E-04 | 1.41 up    | 1.21 up    | -0.05 | -0.54 | -0.26 | PPP1R10    | protein phosphatase 1 regulatory subunit 10               | NR_072994  |
| uc063vcd.1 | 2.76E-04 | 1.41 up    | 1.21 up    | -0.05 | -0.54 | -0.26 | PPP1R10    | protein phosphatase 1 regulatory subunit 10               | NR_072994  |
| uc063whs.1 | 2.76E-04 | 1.41 up    | 1.21 up    | -0.05 | -0.54 | -0.26 | PPP1R10    | protein phosphatase 1 regulatory subunit 10               | NR_072994  |
| uc063xhb.1 | 2.76E-04 | 1.41 up    | 1.21 up    | -0.05 | -0.54 | -0.26 | PPP1R10    | protein phosphatase 1 regulatory subunit 10               | NR_072994  |
| uc063ymx.1 | 8.50E-04 | 1.35 up    | 1.26 up    | -0.18 | -0.61 | -0.28 | PPP1R10    | protein phosphatase 1 regulatory subunit 10               | NR_072994  |
| uc063zss.1 | 2.76E-04 | 1.41 up    | 1.21 up    | -0.05 | -0.54 | -0.26 | PPP1R10    | protein phosphatase 1 regulatory subunit 10               | NR_072994  |
| uc063phe.1 | 5.06E-04 | -1.18 down | -3.78 down | -0.54 | -0.30 | -2.22 | PRIM2      | primase, DNA, polypeptide 2 (58kDa) (PRIM2), trans        | NM_000947  |
| uc010vlg.3 | 5.44E-04 | -1.29 down | -1.32 down | -1.65 | -1.29 | -1.69 | PRMT7      | protein arginine methyltransferase 7 (PRMT7), trans       | NM_0011848 |
| uc064wqo.1 | 7.50E-04 | -1.36 down | -1.63 down | 1.44  | 1.89  | 1.18  | PRRC2B     | proline-rich coiled-coil 2B (PRRC2B), mRNA. (from R       | NM_013318  |
| uc063mxz.1 | 3.53E-04 | -4.06 down | -5.22 down | -3.46 | -1.44 | -3.82 | PSORS1C1,  | psoriasis susceptibility 1 candidate 1 (PSORS1C1), n      | NM_014068  |
| uc058mvt.1 | 3.69E-04 | -1.43 down | -1.54 down | -1.05 | -0.53 | -1.16 | PUS7L      | pseudouridylylase 7 homolog (S. cerevisiae)-              | NM_0010986 |
| uc058jqr.1 | 9.54E-04 | -1.26 down | -2.85 down | -2.29 | -1.96 | -3.46 | RAD52      | RAD52 homolog, DNA repair protein                         | NM_0012974 |
| uc060sfo.1 | 7.58E-04 | -1.14 down | -2.37 down | -1.38 | -1.19 | -2.44 | RANBP3     | RAN binding protein 3 (RANBP3), transcript variant 4      | NM_0013008 |
| uc058tuf.1 | 8.53E-04 | -1.64 down | -1.43 down | -1.54 | -0.83 | -1.34 | RFC5       | replication factor C subunit 5                            | NM_0012068 |
| uc059xcn.1 | 9.57E-04 | -1.43 down | -1.59 down | -0.58 | -0.06 | -0.73 | RFWD3      | ring finger and WD repeat domain 3 (RFWD3), mRNA          | NM_018124  |
| uc064qmg.1 | 6.26E-04 | -2.98 down | 1.08 up    | -1.20 | 0.38  | 0.48  | RP11-157E2 | uncharacterized LOC101927822 (LOC101927822), l            | NR_125424  |
| uc057vee.1 | 4.89E-04 | -1.20 down | -4.26 down | 0.24  | 0.50  | -1.59 | RRP12      | ribosomal RNA processing 12 homolog (S. cerevisiae)       | NM_0012843 |
| uc060hiq.1 | 7.49E-04 | -1.21 down | -1.53 down | -0.26 | 0.01  | -0.60 | RSAD1      | radical S-adenosyl methionine domain containing 1 (F      | NM_018346  |
| uc062oaq.1 | 6.40E-04 | -1.39 down | -1.51 down | -0.36 | 0.11  | -0.48 | RYK        | receptor-like tyrosine kinase (RYK), transcript varian    | NM_002958  |
| uc064bpk.1 | 5.85E-04 | -1.30 down | -4.92 down | -1.40 | -1.02 | -3.32 | SCIN       | scinderin (SCIN), transcript variant 2, mRNA. (from F     | NM_033128  |
| uc063exq.1 | 4.46E-04 | -1.38 down | -1.54 down | 1.30  | 1.76  | 1.14  | SERINC5    | serine incorporator 5                                     | NM_0011740 |
| uc062evq.1 | 7.61E-05 | -1.37 down | -1.25 down | -0.76 | -0.31 | -0.63 | SERLH2     | serine hydrolase-like 2                                   | NR_104301  |
| uc062evt.1 | 4.01E-04 | -1.42 down | -1.28 down | -0.95 | -0.44 | -0.80 | SERLH2     | serine hydrolase-like 2                                   | NR_104300  |
| uc062bvk.1 | 8.81E-04 | -1.52 down | -1.42 down | -0.80 | -0.19 | -0.69 | SERPIND1   | serpin peptidase inhibitor, clade D (heparin cofactor),   | NM_000185  |
| uc062djs.1 | 4.74E-04 | -1.35 down | -1.33 down | -0.73 | -0.29 | -0.71 | SFI1       | Sfi1 homolog, spindle assembly associated (yeast) (S      | NM_014775  |
| uc001zwr.5 | 9.10E-04 | 1.02 up    | 1.67 up    | 0.59  | 0.56  | 1.30  | SLC12A1    | solute carrier family 12 (sodium/potassium/chloride tr    | NM_000338  |
| uc059wbp.1 | 5.97E-04 | -1.62 down | -1.24 down | -1.68 | -0.98 | -1.29 | SLC12A4    | solute carrier family 12 (potassium/chloride transport    | NM_0011459 |
| uc064wao.1 | 3.99E-04 | -1.80 down | -1.66 down | -1.08 | -0.23 | -0.96 | SLC25A25   | solute carrier family 25 (mitochondrial carrier; phosph   | NM_052901  |
| uc063fxo.1 | 5.55E-04 | 1.02 up    | -1.81 down | 0.47  | 0.44  | -0.41 | SLC25A46   | solute carrier family 25 member 46                        | NM_0013032 |
| uc062iyj.1 | 2.16E-04 | -2.20 down | -1.14 down | -0.19 | 0.95  | 0.76  | SLC6A20    | solute carrier family 6 (proline IMINO transporter), m    | NM_022405  |
| uc002cxt.4 | 7.09E-04 | -1.07 down | -3.14 down | -1.91 | -1.81 | -3.47 | SMIM22     | small integral membrane protein 22 (SMIM22), trans        | NM_0012537 |
| uc059qjk.1 | 6.54E-04 | -1.24 down | -3.31 down | -1.76 | -1.45 | -3.18 | SMIM22     | small integral membrane protein 22 (SMIM22), trans        | NM_0012537 |
| uc061ver.1 | 8.60E-04 | -1.43 down | -1.45 down | 1.02  | 1.53  | 0.99  | SMOX       | spermine oxidase (SMOX), transcript variant 2, mRN        | NM_175840  |
| uc057qye.1 | 2.67E-04 | -1.35 down | -3.32 down | -2.80 | -2.37 | -4.10 | SMYD3      | SET and MYND domain containing 3 (SMYD3), trans           | NM_022743  |
| uc064hsz.1 | 1.85E-04 | -1.16 down | -1.53 down | 1.46  | 1.67  | 1.06  | SND1       | staphylococcal nuclease and tudor domain containin        | NM_014390  |
| uc001ffu.2 | 1.20E-04 | 1.01 up    | -6.60 down | 0.68  | 0.67  | -2.05 | SNORA53    | small nucleolar RNA, H/ACA box 53 (SNORA53), sm           | NR_003015  |
| uc064tit.1 | 1.93E-04 | -2.64 down | -7.67 down | -4.13 | -2.73 | -5.67 | SPATA31A7  | SPATA31 subfamily A, member 7 (SPATA31A7), mRN            | NM_015667  |
| uc063eby.1 | 8.86E-04 | -1.33 down | -1.55 down | 0.36  | 0.77  | 0.14  | SREK1      | splicing regulatory glutamine/lysine-rich protein 1 (SR   | NM_0012704 |
| uc058mcg.1 | 4.95E-04 | -1.60 down | -2.98 down | -1.23 | -0.55 | -2.13 | SSPN       | sarcospan (SSPN), transcript variant 2, mRNA. (from       | NM_0011358 |
| uc010rnb.2 | 9.82E-04 | -1.41 down | -1.35 down | 1.35  | 1.84  | 1.41  | STIP1      | stress-induced phosphoprotein 1 (STIP1), transcript       | NM_0012826 |
| uc057jcy.1 | 5.62E-04 | -1.55 down | -1.35 down | 0.07  | 0.71  | 0.27  | STRIP1     | striatin interacting protein 1 (STRIP1), transcript varia | NM_0012707 |
| uc064egv.1 | 8.06E-04 | -1.10 down | -2.56 down | -1.75 | -1.61 | -2.96 | STX1A      | syntaxin 1A (brain) (STX1A), transcript variant 2, mR     | NM_0011659 |
| uc059pdz.1 | 4.54E-04 | -1.52 down | -1.21 down | -1.20 | -0.60 | -0.87 | TBL3       | transducin (beta)-like 3 (TBL3), mRNA. (from RefSeq       | NM_006453  |
| uc060rek.1 | 4.39E-04 | -1.39 down | -1.29 down | -0.33 | 0.14  | -0.23 | TCF3       | transcription factor 3 (TCF3), transcript variant 1, mF   | NM_003200  |

|            |          |            |             |       |       |       |          |                                                                    |
|------------|----------|------------|-------------|-------|-------|-------|----------|--------------------------------------------------------------------|
| uc061znt.1 | 5.57E-04 | -1.77 down | -1.31 down  | -1.83 | -1.01 | -1.40 | TCP10L   | t-complex 10-like (TCP10L), mRNA. (from RefSeq NI NM_144659        |
| uc057kyy.1 | 9.60E-04 | -1.30 down | -1.29 down  | -2.19 | -1.81 | -2.17 | TDRKH    | tudor and KH domain containing (TDRKH), transcript NM_0010839      |
| uc060upn.1 | 4.93E-04 | -1.92 down | -1.60 down  | -1.19 | -0.25 | -0.92 | TECR     | trans-2,3-enoyl-CoA reductase (TECR), transcript vε NM_138501      |
| uc061ojm.1 | 9.66E-04 | -2.23 down | -6.50 down  | -2.10 | -0.95 | -3.65 | TEX41    | testis expressed 41 (non-protein coding) (TEX41), lo: NR_033870    |
| uc061irb.1 | 5.78E-05 | -2.01 down | -1.74 down  | -1.11 | -0.10 | -0.91 | THADA    | thyroid adenoma associated NR_073394                               |
| uc061kij.1 | 8.52E-04 | -1.45 down | -1.55 down  | 0.39  | 0.92  | 0.29  | TIA1     | TIA1 cytotoxic granule-associated RNA binding prote NM_022173      |
| uc060vxm.1 | 4.76E-06 | -3.08 down | -10.76 down | -2.48 | -0.86 | -4.28 | TMEM161A | transmembrane protein 161A (TMEM161A), transcrip NM_0012567        |
| uc062bjc.1 | 4.17E-05 | -1.39 down | -6.22 down  | -2.72 | -2.25 | -4.89 | TMEM191B | transmembrane protein 191B (TMEM191B), mRNA. ( NM_0012423          |
| uc058ssh.1 | 1.51E-05 | -1.43 down | -1.62 down  | -0.05 | 0.46  | -0.24 | TMEM263  | transmembrane protein 263 (TMEM263), mRNA. (fro NM_152261          |
| uc064ooz.1 | 6.35E-04 | 1.04 up    | -3.40 down  | -3.32 | -3.38 | -5.14 | TMEM67   | transmembrane protein 67 NR_024522                                 |
| uc064vgq.1 | 0        | -1.00 down | -1.00 down  | -1.87 | -1.87 | -1.87 | TNC      | tenascin C (TNC), mRNA. (from RefSeq NM_002160 NM_002160           |
| uc061duf.1 | 4.36E-04 | -1.33 down | -1.51 down  | 1.05  | 1.46  | 0.87  | TRIM28   | tripartite motif containing 28 (TRIM28), mRNA. (from NM_005762     |
| uc058qdh.1 | 9.20E-04 | -1.61 down | -1.36 down  | -1.66 | -0.97 | -1.41 | TSFM     | Ts translation elongation factor, mitochondrial (TSFM NM_005726    |
| uc062atf.1 | 8.31E-04 | -1.41 down | -1.34 down  | 0.24  | 0.73  | 0.32  | UBE2G2   | ubiquitin-conjugating enzyme E2G 2 (UBE2G2), trans NM_003343       |
| uc058dep.1 | 4.94E-04 | -1.37 down | -1.52 down  | 1.35  | 1.80  | 1.19  | VPS51    | vacuolar protein sorting 51 homolog (S. cerevisiae) ( NM_013265    |
| uc058fld.1 | 8.78E-05 | -1.23 down | -4.33 down  | -3.01 | -2.72 | -4.83 | XRRA1    | X-ray radiation resistance associated 1 (XRRA1), tra NM_0012703    |
| uc060pua.1 | 1.92E-04 | -1.24 down | -1.59 down  | 1.15  | 1.46  | 0.79  | ZCCHC2   | zinc finger, CCHC domain containing 2 (ZCCHC2), tr NM_017742       |
| uc063ezp.1 | 8.63E-04 | -1.16 down | -3.86 down  | -1.01 | -0.80 | -2.74 | ZCCHC9   | zinc finger, CCHC domain containing 9 (ZCCHC9), tr NM_0011310      |
| uc001knl.5 | 9.98E-04 | -1.25 down | -1.23 down  | -1.75 | -1.43 | -1.73 | ZDHHC16  | zinc finger, DHHC-type containing 16 (ZDHHC16), tr: NM_198043      |
| uc057vfd.1 | 3.53E-04 | -1.65 down | -1.61 down  | -1.07 | -0.35 | -1.04 | ZDHHC16  | zinc finger, DHHC-type containing 16 (ZDHHC16), tr: NM_0012878     |
| uc061you.1 | 1.46E-04 | -1.45 down | -1.61 down  | -0.91 | -0.38 | -1.07 | ZGPAT    | zinc finger, CCCH-type with G patch domain (ZGPAT NM_181485        |
| uc010tbw.3 | 9.73E-04 | -1.56 down | -1.40 down  | -2.72 | -2.09 | -2.57 | ZNF268   | zinc finger protein 268 (ZNF268), transcript variant 5. NM_0011658 |
| uc001ico.4 | 3.87E-04 | -1.34 down | -1.20 down  | -0.64 | -0.21 | -0.47 | ZNF496   | zinc finger protein 496 (ZNF496), mRNA. (from RefS; NM_032752      |
| uc002mtq.3 | 7.41E-04 | -1.46 down | -1.46 down  | -1.27 | -0.72 | -1.26 | ZNF563   | zinc finger protein 563 (ZNF563), mRNA. (from RefS; NM_145276      |
| uc060zmo.1 | 3.04E-04 | -1.91 down | -1.59 down  | -0.53 | 0.41  | -0.26 | ZNF576   | zinc finger protein 576 (ZNF576), transcript variant 2. NM_0011453 |
| uc061dni.1 | 6.00E-04 | -1.27 down | -1.63 down  | -0.91 | -0.56 | -1.26 | ZNF587   | zinc finger protein 587 (ZNF587), transcript variant 2. NM_0012048 |
| uc062iuz.1 | 1.24E-04 | -1.38 down | -1.39 down  | -0.68 | -0.22 | -0.69 | ZNF852   | zinc finger protein 852 (ZNF852), mRNA. (from RefS; NM_0012873     |
| uc002bkr.4 | 1.09E-04 | -1.43 down | -1.29 down  | -2.09 | -1.58 | -1.94 | ZSCAN2   | zinc finger and SCAN domain containing 2 (ZSCAN2) NM_181877        |
| uc059mrx.1 | 4.71E-05 | -1.45 down | -1.25 down  | -2.04 | -1.50 | -1.82 | ZSCAN2   | zinc finger and SCAN domain containing 2 (ZSCAN2) NM_181877        |
| uc059mry.1 | 9.45E-04 | -1.38 down | -1.52 down  | -1.07 | -0.60 | -1.20 | ZSCAN2   | zinc finger and SCAN domain containing 2 (ZSCAN2) NM_181877        |
| uc059msa.1 | 1.12E-04 | -1.45 down | -1.20 down  | -1.64 | -1.11 | -1.36 | ZSCAN2   | zinc finger and SCAN domain containing 2 (ZSCAN2) NM_181877        |

Supplementary Table 2.

| GeneName   |            | p         |      | FC (abs)   |            | Regulation   |                                                                                                                                                    | [F](normaliz   |  | [M](normaliz |  | Symbol |  | Description |  | RefSeq |
|------------|------------|-----------|------|------------|------------|--------------|----------------------------------------------------------------------------------------------------------------------------------------------------|----------------|--|--------------|--|--------|--|-------------|--|--------|
| uc064gjl.1 | 0.01938091 | 3.9134712 | up   | -2.2245476 | -4.1929965 | ACHE         | Homo sapiens acetylcholinesterase (Yt blood group) (ACHE), transcript variant 3, m                                                                 | MM_001282449   |  |              |  |        |  |             |  |        |
| uc010tk.2  | 0.03062528 | 3.39541   | down | -4.2712855 | -2.5076997 | ADAMTS16     | Homo sapiens ADAM metalloproteinase with thrombospondin type 1 motif, 16 (ADAMTS16)                                                                | NR_139056      |  |              |  |        |  |             |  |        |
| uc060emi.1 | 0.00389895 | 3.0257018 | up   | -0.4121704 | -2.0094402 | ARHGAP23     | Homo sapiens Rho GTPase activating protein 23 (ARHGAP23), mRNA. (from RefSeq NM_001199417)                                                         | NR_001199417   |  |              |  |        |  |             |  |        |
| uc064phw.1 | 0.01207369 | 3.2448657 | down | -2.4748294 | -0.7766708 | BAALC        | Homo sapiens brain and acute leukemia, cytoplasmic (BAALC), transcript variant 2, NM_001024372                                                     | NM_001024372   |  |              |  |        |  |             |  |        |
| uc062ahg.1 | 0.02366242 | 3.1006773 | down | -4.0203047 | -2.3877213 | BACE2        | Homo sapiens beta-site APP-cleaving enzyme 2 (BACE2), transcript variant c, mRNA. (from RefSeq NM_138991)                                          | NM_138991      |  |              |  |        |  |             |  |        |
| uc060lv.1  | 0.01410843 | 3.1679745 | down | -2.760526  | -1.0969652 | CCDC137      | Homo sapiens coiled-coil domain containing 137 (CCDC137), mRNA. (from RefSeq NM_199287)                                                            | NM_199287      |  |              |  |        |  |             |  |        |
| uc057tex.1 | 1.43E-04   | 4.8776813 | down | -5.13456   | -2.8483646 | CHAT         | Homo sapiens choline O-acetyltransferase (CHAT), transcript variant N2, mRNA. (from RefSeq NM_020986)                                              | NM_020986      |  |              |  |        |  |             |  |        |
| uc062nwr.1 | 0.00653113 | 3.3447895 | down | -5.167503  | -3.4255874 | CPNE4        | Homo sapiens copine IV (CPNE4), transcript variant 2, mRNA. (from RefSeq NM_15153429)                                                              | NM_15153429    |  |              |  |        |  |             |  |        |
| uc004fsu.2 | 5.25E-29   | 5.0172653 | down | -0.817907  | 1.5089942  | DDX3Y        | Homo sapiens DEAD (Asp-Glu-Ala-Asp) box helicase 3, Y-linked (DDX3Y), transcript NM_001122665                                                      | NM_001122665   |  |              |  |        |  |             |  |        |
| uc004fsv.3 | 1.89E-19   | 4.272347  | down | 0.9116861  | 3.006715   | DDX3Y        | Homo sapiens DEAD (Asp-Glu-Ala-Asp) box helicase 3, Y-linked (DDX3Y), transcript NM_004660                                                         | NM_004660      |  |              |  |        |  |             |  |        |
| uc065crs.1 | 2.24E-31   | 7.2224665 | down | -2.2035515 | 0.64894    | DDX3Y        | Homo sapiens DEAD (Asp-Glu-Ala-Asp) box helicase 3, Y-linked (DDX3Y), transcript NM_001122665                                                      | NM_001122665   |  |              |  |        |  |             |  |        |
| uc002wvp.1 | 0.00206359 | 3.7402442 | down | -0.8678935 | 1.035239   | DEFB115      | Homo sapiens defensin, beta 115 (DEFB115), mRNA. (from RefSeq NM_001033773)                                                                        | NM_001033773   |  |              |  |        |  |             |  |        |
| uc064bwk.1 | 0.00406922 | 3.6024404 | down | -3.4191754 | -1.5702008 | DNAH11       | Homo sapiens dynein, axonemal, heavy chain 11 (DNAH11), mRNA. (from RefSeq NM_001277115)                                                           | NM_001277115   |  |              |  |        |  |             |  |        |
| uc004fuk.5 | 6.28E-38   | 21.4298   | down | 0.2558369  | 4.6773834  | EIF1AY       | Homo sapiens eukaryotic translation initiation factor 1A, Y-linked (EIF1AY), transcript NM_004681                                                  | NM_004681      |  |              |  |        |  |             |  |        |
| uc004ful.5 | 4.38E-26   | 18.869068 | down | -0.9159175 | 3.3220336  | EIF1AY       | Homo sapiens eukaryotic translation initiation factor 1A, Y-linked (EIF1AY), transcript NM_001278612                                               | NM_001278612   |  |              |  |        |  |             |  |        |
| uc065cuc.1 | 3.29E-19   | 7.0512075 | down | -0.5066402 | 2.3112302  | EIF1AY       | Homo sapiens eukaryotic translation initiation factor 1A, Y-linked (EIF1AY), transcript NM_004681                                                  | NM_004681      |  |              |  |        |  |             |  |        |
| uc065cuc.1 | 3.04E-25   | 4.04494   | down | -0.9418847 | 1.0742351  | EIF1AY       | Homo sapiens eukaryotic translation initiation factor 1A, Y-linked (EIF1AY), transcript NM_001278612                                               | NM_001278612   |  |              |  |        |  |             |  |        |
| uc064owu.1 | 0.01960526 | 3.3898225 | up   | -1.1121063 | -2.873316  | HRSP12       | Homo sapiens heat-responsive protein 12 (HRSP12), mRNA. (from RefSeq NM_005005836)                                                                 | NM_005005836   |  |              |  |        |  |             |  |        |
| uc059wsc.1 | 0.0136463  | 3.0066426 | up   | -0.7712486 | -2.359402  | HYDIN        | Homo sapiens HYDIN, axonemal central pair apparatus protein (HYDIN), transcript NM_001270974                                                       | NM_001270974   |  |              |  |        |  |             |  |        |
| uc004fug.4 | 1.02E-27   | 4.0219693 | down | -1.6747676 | 0.3331362  | KDM5D        | Homo sapiens lysine (K)-specific demethylase 5D (KDM5D), transcript variant 2, mFNM_004653                                                         | mFNM_004653    |  |              |  |        |  |             |  |        |
| uc010nwv.4 | 4.32E-27   | 3.7597651 | down | -1.6782808 | 0.23236163 | KDM5D        | Homo sapiens lysine (K)-specific demethylase 5D (KDM5D), transcript variant 3, mFNM_001146706                                                      | mFNM_001146706 |  |              |  |        |  |             |  |        |
| uc011naz.3 | 7.70E-28   | 3.540423  | down | -1.4008155 | 0.42310765 | KDM5D        | Homo sapiens lysine (K)-specific demethylase 5D (KDM5D), transcript variant 1, mFNM_001146705                                                      | mFNM_001146705 |  |              |  |        |  |             |  |        |
| uc065ctw.1 | 1.47E-27   | 4.54361   | down | -1.9088793 | 0.27495986 | KDM5D        | Homo sapiens lysine (K)-specific demethylase 5D (KDM5D), transcript variant 2, mFNM_004653                                                         | mFNM_004653    |  |              |  |        |  |             |  |        |
| uc065cua.1 | 3.20E-32   | 9.69576   | down | -2.2312317 | 1.0461223  | KDM5D        | Homo sapiens lysine (K)-specific demethylase 5D (KDM5D), transcript variant 2, mFNM_004653                                                         | mFNM_004653    |  |              |  |        |  |             |  |        |
| uc059sio.1 | 0.02388188 | 3.6873474 | down | -4.13435   | -2.2517664 | KDM8         | Homo sapiens lysine (K)-specific demethylase 8 (KDM8), transcript variant 1, mFNM_001145348                                                        | mFNM_001145348 |  |              |  |        |  |             |  |        |
| uc031tkv.2 | 1.08E-19   | 4.9962826 | down | 0.37769195 | 2.6985471  | LINC00278    | Homo sapiens long intergenic non-protein coding RNA 278 (LINC00278), long non-coding RNA. (NR_046502)                                              | NR_046502      |  |              |  |        |  |             |  |        |
| uc065cpm.1 | 1.70E-10   | 5.5638766 | down | -0.3208716 | 2.1552188  | LINC00278    | Homo sapiens long intergenic non-protein coding RNA 278 (LINC00278), long non-coding RNA. (NR_046502)                                              | NR_046502      |  |              |  |        |  |             |  |        |
| uc058vvi.1 | 0.00283394 | 3.451988  | down | -1.6120982 | 0.17532915 | LINC01046    | Homo sapiens long intergenic non-protein coding RNA 1046 (LINC01046), long non-coding RNA. (NR_125745)                                             | NR_125745      |  |              |  |        |  |             |  |        |
| uc058xrv.1 | 0.00866287 | 3.8844743 | up   | -0.5234225 | -2.4811418 | LMO7DN-IT1   | Homo sapiens LMO7DN intronic transcript 1 (LMO7DN-IT1), long non-coding RNA. (NR_126373)                                                           | NR_126373      |  |              |  |        |  |             |  |        |
| uc064smd.1 | 0.00512486 | 3.2028503 | down | -4.4714017 | -2.7920454 | LRRC19       | Homo sapiens leucine rich repeat containing 19 (LRRC19), mRNA. (from RefSeq NM_022901)                                                             | NM_022901      |  |              |  |        |  |             |  |        |
| uc032bjl.1 | 0.04585941 | 4.1469225 | down | -3.0917873 | -1.0397455 | MIR151B      | Homo sapiens microRNA 151b (MIR151B), microRNA. (from RefSeq NR_039601)                                                                            | NR_039601      |  |              |  |        |  |             |  |        |
| uc011jvw.2 | 0.03729176 | 4.2927227 | up   | -0.6004785 | -2.7023714 | MIR339       | Homo sapiens microRNA 339 (MIR339), microRNA. (from RefSeq NR_029898)                                                                              | NR_029898      |  |              |  |        |  |             |  |        |
| uc021qaz.1 | 0.02102952 | 6.3192425 | down | -2.5657182 | 0.09403343 | MIR378C      | Homo sapiens microRNA 378c (MIR378C), microRNA. (from RefSeq NR_036180)                                                                            | NR_036180      |  |              |  |        |  |             |  |        |
| uc033ctu.1 | 0.03079745 | 3.9283636 | up   | -0.2509968 | -2.2249253 | MIR4477B     | Homo sapiens microRNA 4477b (MIR4477B), microRNA. (from RefSeq NR_039689)                                                                          | NR_039689      |  |              |  |        |  |             |  |        |
| uc032rvy.1 | 0.01692812 | 4.686864  | up   | 0.85472345 | -1.3738996 | MIR548AB     | Homo sapiens microRNA 548ab (MIR548AB), microRNA. (from RefSeq NR_039611)                                                                          | NR_039611      |  |              |  |        |  |             |  |        |
| uc021uev.1 | 0.03646325 | 4.269607  | up   | 0.18030404 | -1.9137993 | MIR657       | Homo sapiens microRNA 657 (MIR657), microRNA. (from RefSeq NR_030394)                                                                              | NR_030394      |  |              |  |        |  |             |  |        |
| uc033ccb.1 | 0.00573946 | 6.324716  | up   | -1.1741376 | -3.8351383 | MIR6845      | Homo sapiens microRNA 6845 (MIR6845), microRNA. (from RefSeq NR_106904)                                                                            | NR_106904      |  |              |  |        |  |             |  |        |
| uc032dpx.1 | 0.01469008 | 5.113097  | up   | -0.7466453 | -3.1008427 | MIR8065      | Homo sapiens microRNA 8065 (MIR8065), microRNA. (from RefSeq NR_107032)                                                                            | NR_107032      |  |              |  |        |  |             |  |        |
| uc059ppl.1 | 0.02914493 | 4.9069304 | down | -3.316861  | -1.02204   | MIR940       | Homo sapiens microRNA 940 (MIR940), microRNA. (from RefSeq NR_030636)                                                                              | NR_030636      |  |              |  |        |  |             |  |        |
| uc004aul.3 | 0.00267105 | 6.402918  | down | 0.7379887  | -1.940741  | MIRLET7D     | Homo sapiens microRNA let-7d (MIRLET7D), microRNA. (from RefSeq NR_029481)                                                                         | NR_029481      |  |              |  |        |  |             |  |        |
| uc001fie.4 | 6.87E-04   | 4.0007987 | down | -6.4688354 | -4.4685473 | MUC1         | Homo sapiens mucin 1, cell surface associated (MUC1), transcript variant N21, mRNA. (from RefSeq NM_001204297)                                     | NM_001204297   |  |              |  |        |  |             |  |        |
| uc011bee.3 | 0.02034955 | 4.12627   | up   | 0.17895718 | -1.865881  | MIRLET7G     | microRNA let-7g (from HGNC MIRLET7G)                                                                                                               | NR_029660      |  |              |  |        |  |             |  |        |
| uc022ckf.2 | 1.17E-29   | 4.245518  | down | -2.178438  | -0.0924974 | n/a          | n/a                                                                                                                                                | NR_001258249   |  |              |  |        |  |             |  |        |
| uc022ckg.2 | 2.45E-29   | 4.032983  | down | -2.2834322 | -0.271585  | n/a          | n/a                                                                                                                                                | NR_001258252   |  |              |  |        |  |             |  |        |
| uc022ckj.2 | 9.36E-30   | 4.3056283 | down | -2.2440703 | -0.1378465 | n/a          | n/a                                                                                                                                                | NR_001258258   |  |              |  |        |  |             |  |        |
| uc022ckn.2 | 1.38E-28   | 4.086316  | down | -2.2574725 | -0.2266717 | n/a          | n/a                                                                                                                                                | NR_001258251   |  |              |  |        |  |             |  |        |
| uc022ckq.2 | 5.92E-29   | 4.0484033 | down | -2.2933328 | -0.2759796 | n/a          | n/a                                                                                                                                                | NR_001258256   |  |              |  |        |  |             |  |        |
| uc033csg.1 | 0.03073894 | 3.9783487 | up   | -0.381549  | -2.3737187 | n/a          | n/a                                                                                                                                                | NR_039688      |  |              |  |        |  |             |  |        |
| uc057ukp.1 | 0.01872875 | 3.0890422 | down | -1.0552721 | 0.57188743 | n/a          | n/a                                                                                                                                                | NR_073447      |  |              |  |        |  |             |  |        |
| uc059mrx.1 | 0.01835862 | 3.3524635 | up   | 0.5813638  | -1.1638578 | n/a          | n/a                                                                                                                                                | NR_001303234   |  |              |  |        |  |             |  |        |
| uc059xwj.1 | 0.03450751 | 3.166916  | down | -2.1777365 | -0.5146579 | n/a          | n/a                                                                                                                                                | NR_001291454   |  |              |  |        |  |             |  |        |
| uc062zko.1 | 0.00206118 | 4.854856  | up   | -1.1580049 | -3.4374332 | n/a          | n/a                                                                                                                                                | NR_075089      |  |              |  |        |  |             |  |        |
| uc064mda.1 | 0.00944297 | 3.690986  | up   | -3.447562  | -5.3315682 | n/a          | n/a                                                                                                                                                | NR_001174066   |  |              |  |        |  |             |  |        |
| uc065cru.1 | 8.97E-26   | 8.081257  | down | -1.7726135 | 1.2419664  | n/a          | n/a                                                                                                                                                | NR_001302552   |  |              |  |        |  |             |  |        |
| uc065cru.1 | 6.61E-10   | 4.6437545 | down | -0.9508694 | 1.2644224  | n/a          | n/a                                                                                                                                                | NR_001302552   |  |              |  |        |  |             |  |        |
| uc065cru.1 | 2.65E-16   | 3.205997  | down | -0.123269  | 1.557504   | n/a          | n/a                                                                                                                                                | NR_001302552   |  |              |  |        |  |             |  |        |
| uc065crz.1 | 2.67E-20   | 9.097182  | down | -3.7320411 | -0.5466213 | n/a          | n/a                                                                                                                                                | NR_004764      |  |              |  |        |  |             |  |        |
| uc060pnx.1 | 0.01947117 | 3.4469218 | down | -4.8177285 | -3.03242   | NEDD4L       | Homo sapiens neural precursor cell expressed, developmentally down-regulated 4-l (NEDD4L), transcript variant 1, mRNA. (from RefSeq NM_001243960)  | NM_001243960   |  |              |  |        |  |             |  |        |
| uc062vgl.1 | 0.0038996  | 3.2986445 | up   | -1.9106007 | -3.632474  | PEX5L        | Homo sapiens peroxisomal biogenesis factor 5-like (PEX5L), transcript variant 7, mRNA. (from RefSeq NM_001256755)                                  | NM_001256755   |  |              |  |        |  |             |  |        |
| uc059xow.1 | 0.00123614 | 3.5459275 | up   | -1.0632253 | -2.8893883 | PKD1L2       | Homo sapiens polycystic kidney disease 1-like 2 (gene/pseudogene) (PKD1L2), transcript variant 1, mRNA. (from RefSeq NM_001278425)                 | NM_001278425   |  |              |  |        |  |             |  |        |
| uc062zne.1 | 0.00707994 | 3.4278123 | down | -1.7082833 | 0.06900481 | RP11-420A2.2 | Homo sapiens uncharacterized LOC100507487 (LOC100507487), long non-coding RNA. (from RefSeq R1NR_125882)                                           | R1NR_125882    |  |              |  |        |  |             |  |        |
| uc004fqi.4 | 5.80E-08   | 6.858584  | down | 1.8678665  | 4.645777   | RPS4Y1       | Homo sapiens ribosomal protein S4, Y-linked 1 (RPS4Y1), mRNA. (from RefSeq NM_0010008)                                                             | NM_0010008     |  |              |  |        |  |             |  |        |
| uc065cpc.1 | 5.29E-26   | 56.036827 | down | -2.8105843 | 2.997719   | RPS4Y1       | Homo sapiens ribosomal protein S4, Y-linked 1 (RPS4Y1), mRNA. (from RefSeq NM_0010008)                                                             | NM_0010008     |  |              |  |        |  |             |  |        |
| uc065cpd.1 | 1.03E-16   | 3.3501081 | down | 0.06841782 | 1.8126254  | RPS4Y1       | Homo sapiens ribosomal protein S4, Y-linked 1 (RPS4Y1), mRNA. (from RefSeq NM_0010008)                                                             | NM_0010008     |  |              |  |        |  |             |  |        |
| uc061xll.1 | 0.01804181 | 3.123604  | down | -2.845503  | -1.2022915 | SLC12A5      | Homo sapiens solute carrier family 12 (potassium/chloride transporter), member 5 (SLC12A5), transcript variant 1, mRNA. (from RefSeq NM_001134771) | NM_001134771   |  |              |  |        |  |             |  |        |
| uc031tdn.2 | 0.02524371 | 5.191672  | up   | -0.6484059 | -3.024605  | SNORD121B    | Homo sapiens small nucleolar RNA, C/D box 121B (SNORD121B), small nucleolar RNA. (from RefSeq NR_00102370)                                         | NR_00102370    |  |              |  |        |  |             |  |        |
| uc057zln.1 | 0.02050424 | 4.863273  | down | -2.7753856 | -0.493458  | SNORD14B     | Homo sapiens small nucleolar RNA, C/D box 14B (SNORD14B), small nucleolar RNA. (from RefSeq NR_001452)                                             | NR_001452      |  |              |  |        |  |             |  |        |
| uc060hqf.1 | 0.01399945 | 3.0946639 | down | -2.309882  | -0.6800992 | TOM1L1       | Homo sapiens target of myb1 (chicken)-like 1 (TOM1L1), mRNA. (from RefSeq NM_005486)                                                               | NM_005486      |  |              |  |        |  |             |  |        |
| uc065crn.1 | 2.29E-16   | 4.51908   | down | -0.8411754 | 1.3348538  | TTY15        | Homo sapiens testis-specific transcript, Y-linked 15 (non-protein coding) (TTY15), transcript variant 1, mRNA. (from RefSeq NM_001545)             | NR_001545      |  |              |  |        |  |             |  |        |
| uc061awx.1 | 0.02167169 | 3.129873  | down | -3.7801132 | -2.1340091 | TULP2        | Homo sapiens tubby like protein 2 (TULP2), mRNA. (from RefSeq NM_003323)                                                                           | NM_003323      |  |              |  |        |  |             |  |        |
| uc065crq.1 | 2.53E-11   | 3.331889  | down | -1.6803708 | 0.05596946 | USPY9        | Homo sapiens ubiquitin specific peptidase 9, Y-linked (USPY9), mRNA. (from RefSeq NM_004654)                                                       | NM_004654      |  |              |  |        |  |             |  |        |
| uc004fss.3 | 2.21E-29   | 4.0840335 | down | -2.3133934 | -0.2833986 | UTY          | Homo sapiens ubiquitously transcribed tetratricopeptide repeat containing, Y-linked NM_182659                                                      | NM_182659      |  |              |  |        |  |             |  |        |
| uc004fsy.4 | 4.22E-27   | 4.5797243 | down | -2.1563802 | 0.03888058 | UTY          | Homo sapiens ubiquitously transcribed tetratricopeptide repeat containing, Y-linked NM_182660                                                      | NM_182660      |  |              |  |        |  |             |  |        |
| uc004fss.3 | 1.70E-21   | 3.3569968 | down | -1.3580545 | 0.38911662 | UTY          | Homo sapiens ubiquitously transcribed tetratricopeptide repeat containing, Y-linked NM_182660                                                      | NM_182660      |  |              |  |        |  |             |  |        |
| uc022cjm.2 | 4.60E-29   | 4.0109487 | down | -2.262525  | -0.2586097 | UTY          | Homo sapiens ubiquitously transcribed tetratricopeptide repeat containing, Y-linked NM_001258266                                                   | NM_001258266   |  |              |  |        |  |             |  |        |
| uc022cjk.2 | 5.10E-28   | 3.8581698 | down | -2.2205687 | -0.2726521 | UTY          | Homo sapiens ubiquitously transcribed tetratricopeptide repeat containing, Y-linked NM_001258265                                                   | NM_001258265   |  |              |  |        |  |             |  |        |
| uc022cjk.2 | 8.41E-29   | 3.992532  | down | -2.1967497 | -0.1994457 | UTY          | Homo sapiens ubiquitously transcribed tetratricopeptide repeat containing, Y-linked NM_001258261                                                   | NM_001258261   |  |              |  |        |  |             |  |        |
| uc022cjp.3 | 3.88E-33   | 5.529723  | down | -2.6395357 | -0.1541803 | UTY          | Homo sapiens ubiquitously transcribed tetratricopeptide repeat containing, Y-linked NM_001258254                                                   | NM_001258254   |  |              |  |        |  |             |  |        |
| uc065csc.1 | 1.17E-07   | 3.8994606 | down | -1.1526278 | 0.8106468  | UTY          | Homo sapiens ubiquitously transcribed tetratricopeptide repeat containing, Y-linked NM_182660                                                      | NM_182660      |  |              |  |        |  |             |  |        |
| uc004ebm.3 | 1.55E-29   | 4.762518  | up   | 3.2276194  | 0.975895   | XIST         | Homo sapiens X inactive specific transcript (non-protein coding) (XIST), long non-coding RNA. (from RefSeq NR_001564)                              | NR_001564      |  |              |  |        |  |             |  |        |
| uc064zym.1 | 5.07E-16   | 3.0539112 | up   | 0.8455181  | -0.7651401 | XIST         | Homo sapiens X inactive specific transcript (non-protein coding) (XIST), long non-coding RNA. (from RefSeq NR_001564)                              | NR_001564      |  |              |  |        |  |             |  |        |

|            |          |           |      |            |            |      |                                                                                                |
|------------|----------|-----------|------|------------|------------|------|------------------------------------------------------------------------------------------------|
| uc064zyn.1 | 4.77E-17 | 3.903899  | up   | 0.44827378 | -1.516642  | XIST | Homo sapiens X inactive specific transcript (non-protein coding) (XIST), long non-co NR_001564 |
| uc064zyo.1 | 1.12E-20 | 4.9645014 | up   | 0.9907029  | -1.3209459 | XIST | Homo sapiens X inactive specific transcript (non-protein coding) (XIST), long non-co NR_001564 |
| uc065cpi.1 | 1.93E-12 | 4.6426497 | down | -1.6081386 | 0.6068098  | ZFY  | Homo sapiens zinc finger protein, Y-linked (ZFY), transcript variant 1, mRNA. (from NM_003411  |

Supplementary Table 3. ANOVA analysis of TRACS

| GeneName   | p        | Regulation | FC (abs)  | FC        | Log FC     | Log2 RPKM Expression |               |              | Description                                                                                                                                              | RefSeq       |
|------------|----------|------------|-----------|-----------|------------|----------------------|---------------|--------------|----------------------------------------------------------------------------------------------------------------------------------------------------------|--------------|
|            |          |            |           |           |            | [LOW]                | [norm [MID+]] | [norm Symbol |                                                                                                                                                          |              |
| uc060kqb.1 | 9.52E-04 | DOWN       | 1.4337534 | 1.4337534 | 0.51979685 | -0.185121            | -0.7049179    | SEPTIN9      | Homo sapiens septin 9 (SEPT9), transcript variant 9, mRNA. (from RefSeq NM_001293696)                                                                    | NM_001293696 |
| uc003wjo.3 | 9.21E-05 | DOWN       | 1.2744105 | 1.2744105 | 0.34983003 | 1.0920848            | 0.74225473    | ABCF2        | Homo sapiens ATP-binding cassette, sub-family F (GCN20), member 2 (ABCF2), transcript variant 2, NM_005692                                               |              |
| uc064jff.1 | 7.85E-04 | DOWN       | 1.2906467 | 1.2906467 | 0.3680941  | 0.6617042            | 0.2936101     | ABCF2        | Homo sapiens ATP-binding cassette, sub-family F (GCN20), member 2 (ABCF2), transcript variant 2, NM_005692                                               |              |
| uc057wcy.1 | 8.08E-04 | DOWN       | 1.3010219 | 1.3010219 | 0.3796453  | -0.053218            | -0.4328632    | ABLIM1       | Homo sapiens actin binding LIM protein 1 (ABLIM1), transcript variant 1, mRNA. (from RefSeq NM_0022313)                                                  |              |
| uc057bbq.1 | 4.81E-04 | DOWN       | 1.3252088 | 1.3252088 | 0.40621966 | 1.2488762            | 0.84265655    | ACAP3        | Homo sapiens ArfGAP with coiled-coil, ankyrin repeat and PH domains 3 (ACAP3), mRNA. (from RefSeq NM_030649)                                             |              |
| uc064mff.1 | 9.69E-04 | DOWN       | 2.3338773 | 2.3338773 | 1.2227287  | -2.3129778           | -3.5357065    | ADAM32       | Homo sapiens ADAM metalloproteinase domain 32 (ADAM32), mRNA. (from RefSeq NM_145004)                                                                    | NM_145004    |
| uc002zgr.3 | 6.60E-04 | DOWN       | 1.3100791 | 1.3100791 | 0.38965392 | -0.7031987           | -1.0928526    | ADARB1       | Homo sapiens adenosine deaminase, RNA-specific, B1 (ADARB1), transcript variant 3, mRNA. (from NM_015834)                                                |              |
| uc059xhj.1 | 6.69E-04 | DOWN       | 1.5142472 | 1.5142472 | 0.59860075 | 1.7449799            | 1.463791      | ADAT1        | Homo sapiens adenosine deaminase, tRNA-specific 1 (ADAT1), transcript variant 1, mRNA. (from RefSeq NM_012091)                                           |              |
| uc021xqj.2 | 6.12E-05 | DOWN       | 1.7142575 | 1.7142575 | 0.7775838  | -1.9975505           | -2.7751343    | ADH7         | Homo sapiens alcohol dehydrogenase 7 (class IV), mu or sigma polypeptide (ADH7), transcript variant 1, mRNA. (from RefSeq NM_001166504)                  |              |
| uc002bmt.3 | 9.57E-04 | DOWN       | 1.2088468 | 1.2088468 | 0.27363142 | 1.1450907            | 0.8714593     | AEN          | Homo sapiens apoptosis enhancing nuclease (AEN), mRNA. (from RefSeq NM_022767)                                                                           | NM_022767    |
| uc062apr.1 | 5.21E-04 | DOWN       | 1.3921204 | 1.3921204 | 0.47728395 | 0.42026684           | -0.0570171    | AGPAT3       | Homo sapiens 1-acylglycerol-3-phosphate O-acyltransferase 3 (AGPAT3), transcript variant 2, mRNA. (from RefSeq NM_001037553)                             |              |
| uc011kox.3 | 7.76E-04 | DOWN       | 1.2946298 | 1.2946298 | 0.37253964 | -0.6687162           | -1.0412558    | AHCYL2       | Homo sapiens adenosylhomocysteinase-like 2 (AHCYL2), transcript variant 3, mRNA. (from RefSeq NM_001130722)                                              |              |
| uc064uzz.1 | 8.86E-04 | DOWN       | 1.3878013 | 1.3878013 | 0.472801   | -0.4984947           | -0.9712957    | AKAP2        | Homo sapiens A kinase (PRKA) anchor protein 2 (AKAP2), transcript variant 2, mRNA. (from RefSeq NM_001136562)                                            |              |
| uc064ieo.1 | 4.98E-04 | DOWN       | 1.260167  | 1.260167  | 0.33361495 | 0.13701719           | -0.1965978    | AKR1B1       | Homo sapiens aldo-keto reductase family 1, member B1 (aldose reductase) (AKR1B1), mRNA. (from RefSeq NM_001628)                                          |              |
| uc001ukx.3 | 4.25E-04 | DOWN       | 1.2933732 | 1.2933732 | 0.37113863 | 1.04623              | 0.6750913     | ANKLE2       | Homo sapiens ankyrin repeat and LEM domain containing 2 (ANKLE2), mRNA. (from RefSeq NM_015114)                                                          |              |
| uc061lxq.1 | 4.91E-04 | DOWN       | 1.416466  | 1.416466  | 0.502296   | -0.9948019           | -1.497098     | ANKRD23      | Homo sapiens ankyrin repeat domain 23 (ANKRD23), mRNA. (from RefSeq NM_144994)                                                                           | NM_144994    |
| uc064mjf.1 | 3.22E-04 | DOWN       | 1.3409983 | 1.3409983 | 0.4233074  | -1.183571            | -1.6068784    | AP3M2        | Homo sapiens adaptor-related protein complex 3, mu 2 subunit (AP3M2), transcript variant 2, mRNA. (from RefSeq NM_006803)                                |              |
| uc001mdb.4 | 1.54E-04 | DOWN       | 1.3240794 | 1.3240794 | 0.40498963 | -0.7239344           | -1.128924     | APBB1        | Homo sapiens amyloid beta (A4) precursor protein-binding, family B, member 1 (Fe65) (APBB1), transcript variant 1, mRNA. (from RefSeq NM_001164)         |              |
| uc001mdc.3 | 1.14E-04 | DOWN       | 1.3491114 | 1.3491114 | 0.43200952 | -0.5606896           | -0.9926991    | APBB1        | Homo sapiens amyloid beta (A4) precursor protein-binding, family B, member 1 (Fe65) (APBB1), transcript variant 1, mRNA. (from RefSeq NM_145689)         |              |
| uc001mdd.6 | 4.39E-04 | DOWN       | 1.3442086 | 1.3442086 | 0.42675704 | -1.2639574           | -1.6907145    | APBB1        | Homo sapiens amyloid beta (A4) precursor protein-binding, family B, member 1 (Fe65) (APBB1), transcript variant 1, mRNA. (from RefSeq NM_001257323)      |              |
| uc057yjt.1 | 5.44E-04 | DOWN       | 1.3164849 | 1.3164849 | 0.396691   | -1.6357287           | -2.0324197    | APBB1        | Homo sapiens amyloid beta (A4) precursor protein-binding, family B, member 1 (Fe65) (APBB1), transcript variant 1, mRNA. (from RefSeq NM_001257321)      |              |
| uc057yiv.1 | 6.77E-05 | DOWN       | 1.3608962 | 1.3608962 | 0.44455707 | -0.5966111           | -1.0411681    | APBB1        | Homo sapiens amyloid beta (A4) precursor protein-binding, family B, member 1 (Fe65) (APBB1), transcript variant 1, mRNA. (from RefSeq NM_001164)         |              |
| uc057yjj.1 | 1.95E-04 | DOWN       | 1.3163289 | 1.3163289 | 0.39652    | -0.7434836           | -1.1400036    | APBB1        | Homo sapiens amyloid beta (A4) precursor protein-binding, family B, member 1 (Fe65) (APBB1), transcript variant 1, mRNA. (from RefSeq NM_001164)         |              |
| uc057yka.1 | 3.43E-04 | DOWN       | 1.3295468 | 1.3295468 | 0.41093457 | -0.5385923           | -0.9495268    | APBB1        | Homo sapiens amyloid beta (A4) precursor protein-binding, family B, member 1 (Fe65) (APBB1), transcript variant 1, mRNA. (from RefSeq NM_001164)         |              |
| uc057ykb.1 | 4.13E-04 | DOWN       | 1.3299803 | 1.3299803 | 0.41140482 | -1.632174            | -2.0435789    | APBB1        | Homo sapiens amyloid beta (A4) precursor protein-binding, family B, member 1 (Fe65) (APBB1), transcript variant 1, mRNA. (from RefSeq NM_001257321)      |              |
| uc057ykd.1 | 5.06E-05 | DOWN       | 1.4381772 | 1.4381772 | 0.52424145 | -1.1580667           | -1.6823082    | APBB1        | Homo sapiens amyloid beta (A4) precursor protein-binding, family B, member 1 (Fe65) (APBB1), transcript variant 1, mRNA. (from RefSeq NM_001257320)      |              |
| uc061yli.1 | 8.04E-04 | DOWN       | 1.5089302 | 1.5089302 | 0.59352607 | -0.3083625           | -0.9018886    | ARFGAP1      | Homo sapiens ADP-ribosylation factor GTPase activating protein 1 (ARFGAP1), transcript variant 1, mRNA. (from RefSeq NM_018209)                          |              |
| uc065ahz.1 | 1.71E-04 | DOWN       | 1.4031242 | 1.4031242 | 0.48864272 | -0.0871896           | -0.5758323    | ARMCX6       | Homo sapiens armadillo repeat containing, X-linked 6 (ARMCX6), transcript variant 3, mRNA. (from RefSeq NM_001184768)                                    |              |
| uc003cgd.4 | 5.36E-04 | DOWN       | 4.2413015 | 4.2413015 | 2.084507   | -4.205631            | -6.290138     | ARPP21       | Homo sapiens cAMP-regulated phosphoprotein, 21kDa (ARPP21), transcript variant 7, mRNA. (from RefSeq NM_001267618)                                       |              |
| uc059zrw.1 | 2.96E-04 | DOWN       | 1.3435875 | 1.3435875 | 0.4260903  | 1.8983804            | 1.47229       | ATP2A3       | Homo sapiens ATPase, Ca++ transporting, ubiquitous (ATP2A3), transcript variant 7, mRNA. (from RefSeq NM_174958)                                         |              |
| uc002jfh.4 | 3.81E-04 | DOWN       | 1.4512465 | 1.4512465 | 0.5372926  | -0.6264079           | -1.1637005    | AXIN2        | Homo sapiens axin 2 (AXIN2), mRNA. (from RefSeq NM_004655)                                                                                               | NM_004655    |
| uc001ynh.3 | 8.47E-04 | DOWN       | 1.3201435 | 1.3201435 | 0.4006947  | 1.1346888            | 0.73399335    | BAG5         | Homo sapiens BCL2-associated athanogene 5 (BAG5), transcript variant 1, mRNA. (from RefSeq NM_001015049)                                                 |              |
| uc059ulu.1 | 2.64E-04 | DOWN       | 1.9204495 | 1.9204495 | 0.94144404 | -0.0587493           | -1.0001934    | BBS2         | Homo sapiens Bardet-Biedl syndrome 2 (BBS2), mRNA. (from RefSeq NM_031885)                                                                               | NM_031885    |
| uc061wwa.1 | 1.26E-04 | DOWN       | 1.4126246 | 1.4126246 | 0.49837813 | 0.24412708           | -0.2542511    | BLCAP        | Homo sapiens bladder cancer associated protein (BLCAP), transcript variant 2, mRNA. (from RefSeq NM_001167820)                                           |              |
| uc061wwb.1 | 8.95E-04 | DOWN       | 1.3646924 | 1.3646924 | 0.44857585 | 0.1648186            | -0.2837572    | BLCAP        | Homo sapiens bladder cancer associated protein (BLCAP), transcript variant 2, mRNA. (from RefSeq NM_001167820)                                           |              |
| uc064kgd.1 | 7.42E-04 | DOWN       | 1.3937876 | 1.3937876 | 0.47901073 | 0.83950424           | 0.36049345    | BLK          | Homo sapiens BLK proto-oncogene, Src family tyrosine kinase (BLK), mRNA. (from RefSeq NM_001715)                                                         |              |
| uc063hjk.1 | 9.02E-04 | DOWN       | 1.332296  | 1.332296  | 0.41391465 | -0.6734464           | -1.087361     | BRD8         | Homo sapiens bromodomain containing 8 (BRD8), transcript variant 6, mRNA. (from RefSeq NM_001300962)                                                     |              |
| uc003dzb.5 | 4.12E-04 | DOWN       | 1.7705259 | 1.7705259 | 0.824178   | 0.9693076            | 0.14512964    | BTLA         | Homo sapiens B and T lymphocyte associated (BTLA), transcript variant 2, mRNA. (from RefSeq NM_001085357)                                                |              |
| uc058bon.1 | 2.60E-04 | DOWN       | 1.3815451 | 1.3815451 | 0.4662826  | 1.6815842            | 1.2153016     | C11orf31     | Homo sapiens chromosome 11 open reading frame 31 (C11orf31), mRNA. (from RefSeq NM_17074)                                                                | NM_17074     |
| uc058usc.1 | 9.80E-04 | DOWN       | 1.4553193 | 1.4553193 | 0.5413357  | -0.7864534           | -1.3277892    | C12orf65     | Homo sapiens chromosome 12 open reading frame 65 (C12orf65), transcript variant 1, mRNA. (from RefSeq NM_152269)                                         |              |
| uc059tos.1 | 3.95E-04 | DOWN       | 1.3457203 | 1.3457203 | 0.42837858 | -0.768739            | -1.1971176    | C16orf58     | Homo sapiens chromosome 16 open reading frame 58 (C16orf58), mRNA. (from RefSeq NM_02274)                                                                | NM_02274     |
| uc021tna.1 | 3.01E-04 | DOWN       | 1.3925934 | 1.3925934 | 0.47777405 | 0.6382703            | 0.16049625    | C17orf97     | Homo sapiens chromosome 17 open reading frame 97 (C17orf97), mRNA. (from RefSeq NM_0010101)                                                              | NM_0010101   |
| uc002rjt.4 | 8.56E-04 | DOWN       | 1.2446817 | 1.2446817 | 0.31577685 | 0.35971102           | 0.04393421    | CAD          | Homo sapiens carbamoyl-phosphate synthetase 2, aspartate transcarbamylase, and dihydroorotase (CAD), transcript variant 1, mRNA. (from RefSeq NM_004341) |              |
| uc063fyf.1 | 6.94E-04 | DOWN       | 1.3283268 | 1.3283268 | 0.40961015 | 0.848183             | 0.4385728     | CAMK4        | Homo sapiens calcium/calmodulin-dependent protein kinase IV (CAMK4), mRNA. (from RefSeq NM_001744)                                                       |              |
| uc010nbg.4 | 8.59E-04 | DOWN       | 1.1643348 | 1.1643348 | 0.21950592 | 0.099172             | -0.1203339    | CAMSAP1      | Homo sapiens calmodulin regulated spectrin-associated protein 1 (CAMSAP1), mRNA. (from RefSeq NM_015447)                                                 |              |
| uc064rtg.1 | 4.80E-04 | DOWN       | 1.9413694 | 1.9413694 | 0.95707464 | -3.2309866           | -4.188061     | CBWD1        | Homo sapiens COB domain containing 1 (CBWD1), transcript variant 1, mRNA. (from RefSeq NM_0018491)                                                       |              |
| uc021wxn.3 | 6.08E-04 | DOWN       | 1.3152108 | 1.3152108 | 0.39529407 | -0.3335028           | -0.7287969    | CCDC51       | Homo sapiens coiled-coil domain containing 51 (CCDC51), transcript variant 3, mRNA. (from RefSeq NM_001256965)                                           |              |
| uc010atx.4 | 4.81E-04 | DOWN       | 1.3128444 | 1.3128444 | 0.39269593 | 2.970372             | 2.577676      | CCDC88C      | Homo sapiens coiled-coil domain containing 88C (CCDC88C), mRNA. (from RefSeq NM_001080414)                                                               |              |
| uc058mhe.1 | 9.03E-04 | DOWN       | 1.414445  | 1.414445  | 0.5002361  | 1.3163532            | 0.8161171     | CCDC91       | Homo sapiens coiled-coil domain containing 91 (CCDC91), mRNA. (from RefSeq NM_018318)                                                                    | NM_018318    |
| uc063myg.1 | 4.14E-04 | DOWN       | 2.0276597 | 2.0276597 | 1.0198154  | -5.231518            | -6.251333     | CCHCR1       | Homo sapiens coiled-coil alpha-helical rod protein 1 (CCHCR1), transcript variant 3, mRNA. (from RefSeq NM_019052)                                       |              |
| uc060xci.1 | 5.68E-04 | DOWN       | 1.5151955 | 1.5151955 | 0.59950393 | -0.6206064           | -1.2201103    | CD22         | Homo sapiens CD22 molecule (CD22), transcript variant 5, mRNA. (from RefSeq NM_001278417)                                                                | NM_001278417 |



|            |          |      |           |            |            |            |            |           |                                                                                                                                  |
|------------|----------|------|-----------|------------|------------|------------|------------|-----------|----------------------------------------------------------------------------------------------------------------------------------|
| uc064bww.1 | 7.87E-04 | DOWN | 1.4893333 | 1.4893333  | 0.5746666  | -0.4312408 | -1.0059074 | CDCA7L    | Homo sapiens cell division cycle associated 7-like (CDCA7L), transcript variant 3, mRNA. (from RefSeq NM_001127371)              |
| uc064bwy.1 | 1.07E-04 | DOWN | 1.5699714 | 1.5699714  | 0.6507383  | -0.3568905 | -1.0076288 | CDCA7L    | Homo sapiens cell division cycle associated 7-like (CDCA7L), transcript variant 2, mRNA. (from RefSeq NM_001127370)              |
| uc059xrx.1 | 1.26E-04 | DOWN | 5.5537534 | 5.5537534  | 2.473463   | -1.2926244 | -3.7660873 | CDH13     | Homo sapiens cadherin 13 (CDH13), transcript variant 5, mRNA. (from RefSeq NM_001220491)                                         |
| uc060awd.1 | 8.00E-04 | DOWN | 1.6806908 | 1.6806908  | 0.7490543  | 2.506842   | 1.7577876  | CHD3      | Homo sapiens chromodomain helicase DNA binding protein 3 (CHD3), transcript variant 2, mRNA. (from RefSeq NM_005852)             |
| uc064ldx.1 | 7.20E-04 | DOWN | 1.3877572 | 1.3877572  | 0.47275516 | 0.6397034  | 0.16694826 | CHMP7     | Homo sapiens charged multivesicular body protein 7 (CHMP7), mRNA. (from RefSeq NM_152272)                                        |
| uc059ljk.1 | 5.54E-04 | DOWN | 1.3671507 | 1.3671507  | 0.45117223 | 0.8071874  | 0.35601518 | CLK3      | Homo sapiens CDC-like kinase 3 (CLK3), transcript variant 2, mRNA. (from RefSeq NM_003992)                                       |
| uc064kms.1 | 7.10E-04 | DOWN | 1.3634907 | 1.3634907  | 0.44730484 | 1.4489573  | 1.0016525  | CNOT7     | Homo sapiens CCR4-NOT transcription complex, subunit 7 (CNOT7), transcript variant 2, mRNA. (from RefSeq NM_054026)              |
| uc063jat.1 | 2.72E-04 | DOWN | 1.5294986 | 1.5294986  | 0.61305875 | 0.32510754 | -0.2879512 | CNOT8     | Homo sapiens CCR4-NOT transcription complex, subunit 8 (CNOT8), transcript variant 3, mRNA. (from RefSeq NM_001301074)           |
| uc057egb.1 | 5.95E-04 | DOWN | 5.4626527 | 5.4626527  | 2.4496017  | -1.4775615 | -3.9271631 | COL16A1   | Homo sapiens collagen, type XVI, alpha 1 (COL16A1), mRNA. (from RefSeq NM_001856)                                                |
| uc064rqz.1 | 1.73E-04 | DOWN | 1.5200763 | 1.5200763  | 0.60414374 | 0.6395183  | 0.03537459 | COMMD5    | Homo sapiens COMM domain containing 5 (COMMD5), transcript variant 3, mRNA. (from RefSeq NM_001081004)                           |
| uc064ofx.1 | 5.48E-04 | DOWN | 1.6919246 | 1.6919246  | 0.75866526 | 0.70704895 | -0.0516163 | CPNE3     | Homo sapiens copine III (CPNE3), mRNA. (from RefSeq NM_003909)                                                                   |
| uc062lwg.1 | 1.45E-04 | DOWN | 1.4263507 | 1.4263507  | 0.51232874 | 1.625692   | 1.1133633  | CPOX      | Homo sapiens coproporphyrinogen oxidase (CPOX), mRNA. (from RefSeq NM_000097)                                                    |
| uc009voy.2 | 6.80E-04 | DOWN | 1.4515594 | 1.4515594  | 0.5376036  | 2.3564265  | 1.8188229  | CROCC     | Homo sapiens ciliary rootlet coiled-coil, rootletin (CROCC), mRNA. (from RefSeq NM_014675)                                       |
| uc009ykw.4 | 3.53E-04 | DOWN | 1.2723478 | 1.2723478  | 0.30749308 | 1.02051815 | -0.226975  | CRY2      | Homo sapiens cryptochrome circadian clock 2 (CRY2), transcript variant 2, mRNA. (from RefSeq NM_001127457)                       |
| uc010rgn.2 | 1.46E-04 | DOWN | 1.19535   | 1.19535    | 0.25743315 | 0.8755804  | 0.6181472  | CRY2      | Homo sapiens cryptochrome circadian clock 2 (CRY2), transcript variant 1, mRNA. (from RefSeq NM_021117)                          |
| uc058ato.1 | 1.38E-04 | DOWN | 1.1960957 | 1.1960957  | 0.25833282 | 0.8766598  | 0.618327   | CRY2      | Homo sapiens cryptochrome circadian clock 2 (CRY2), transcript variant 1, mRNA. (from RefSeq NM_021117)                          |
| uc062ukk.1 | 8.32E-04 | DOWN | 1.3743054 | 1.3743054  | 0.4587026  | 0.43223295 | -0.0264697 | CTBP1     | Homo sapiens C-terminal binding protein 1 (CTBP1), transcript variant 2, mRNA. (from RefSeq NM_001012614)                        |
| uc059zqi.1 | 2.29E-04 | DOWN | 1.7476925 | 1.7476925  | 0.80545133 | -0.2479629 | -1.0534142 | CTNS      | Homo sapiens cystinosis, lysosomal cystine transporter (CTNS), transcript variant 2, mRNA. (from RefSeq NM_004937)               |
| uc057jkc.1 | 3.39E-04 | DOWN | 1.4018576 | 1.4018576  | 0.48733982 | -0.0166596 | -0.5039994 | CTTNBP2NL | Homo sapiens CTTNBP2 N-terminal like (CTTNBP2NL), mRNA. (from RefSeq NM_018704)                                                  |
| uc002leq.5 | 4.03E-04 | DOWN | 1.2371509 | 1.2371509  | 0.3070215  | 0.2981659  | -0.0088556 | CXCC1     | Homo sapiens CXXC finger protein 1 (CXCC1), transcript variant 2, mRNA. (from RefSeq NM_014593)                                  |
| uc063hsz.1 | 9.93E-04 | DOWN | 1.2923493 | 1.2923493  | 0.3699961  | -0.3193838 | -0.6893799 | CXXC5     | Homo sapiens CXXC finger protein 5 (CXXC5), mRNA. (from RefSeq NM_016463)                                                        |
| uc058ccb.1 | 3.72E-04 | DOWN | 1.5803254 | 1.5803254  | 0.66022164 | -0.0946591 | -0.7548807 | CYB561A3  | Homo sapiens cytochrome b561 family, member A3 (CYB561A3), transcript variant 4, mRNA. (from RefSeq NM_001300763)                |
| uc059zsi.1 | 7.55E-04 | DOWN | 1.3452644 | 1.3452644  | 0.4278898  | -0.7224397 | -1.1503295 | CYB5D2    | Homo sapiens cytochrome b5 domain containing 2 (CYB5D2), transcript variant 2, mRNA. (from RefSeq NM_001254755)                  |
| uc061otq.1 | 1.87E-05 | DOWN | 1.4315364 | 1.4315364  | 0.51756436 | 0.38363758 | -0.1339269 | CYTIIP    | Homo sapiens cytohesin 1 interacting protein (CYTIIP), mRNA. (from RefSeq NM_004288)                                             |
| uc060trt.1 | 6.73E-04 | DOWN | 1.6379657 | 1.6379657  | 0.7119051  | 2.3080022  | 1.5960971  | DAPK3     | Homo sapiens death-associated protein kinase 3 (DAPK3), mRNA. (from RefSeq NM_001348)                                            |
| uc002tux.2 | 8.79E-04 | DOWN | 1.2755452 | 1.2755452  | 0.35111406 | 3.121397   | 2.770283   | DARS      | Homo sapiens aspartyl-tRNA synthetase (DARS), transcript variant 1, mRNA. (from RefSeq NM_0011349)                               |
| uc058mlq.1 | 9.58E-04 | DOWN | 1.923227  | 1.923227   | 0.943529   | -1.1854318 | -2.1289608 | DDX11     | Homo sapiens DEAD/H (Asp-Glu-Ala-Asp/His) box helicase 11 (DDX11), transcript variant 5, mRNA. (from RefSeq NM_001257145)        |
| uc057jjs.1 | 7.91E-04 | DOWN | 1.3948647 | 1.3948647  | 0.48012516 | 0.2522162  | -0.227909  | DDX20     | Homo sapiens DEAD (Asp-Glu-Ala-Asp) box polypeptide 20 (DDX20), mRNA. (from RefSeq NM_007204)                                    |
| uc058utt.1 | 4.44E-04 | DOWN | 1.3347564 | 1.3347564  | 0.41657645 | -1.2244805 | -1.6410569 | DDX55     | Homo sapiens DEAD (Asp-Glu-Ala-Asp) box polypeptide 55 (DDX55), mRNA. (from RefSeq NM_020909)                                    |
| uc021wlp.2 | 1.54E-05 | DOWN | 1.4976513 | 1.4976513  | 0.5827018  | 0.42528155 | -0.1574202 | DGCR8     | Homo sapiens DGCR8 microprocessor complex subunit (DGCR8), transcript variant 2, mRNA. (from RefSeq NM_001190326)                |
| uc058pdr.1 | 8.60E-04 | DOWN | 1.8234607 | 1.8234607  | 0.8666791  | 0.07406825 | -0.7926108 | DGKA      | Homo sapiens diacylglycerol kinase, alpha 80kDa (DGKA), transcript variant 4, mRNA. (from RefSeq NM_201554)                      |
| uc058pdy.1 | 1.65E-04 | DOWN | 1.4035074 | 1.4035074  | 0.48903662 | 0.18466794 | -0.3043687 | DGKA      | Homo sapiens diacylglycerol kinase, alpha 80kDa (DGKA), transcript variant 4, mRNA. (from RefSeq NM_201554)                      |
| uc060uba.1 | 4.56E-04 | DOWN | 1.4090039 | 1.4090039  | 0.49467555 | 0.12977083 | -0.3649048 | DHPS      | Homo sapiens deoxyhypusine synthase (DHPS), transcript variant 1, mRNA. (from RefSeq NM_001930)                                  |
| uc062jfe.1 | 1.41E-04 | DOWN | 1.5565609 | 1.5565609  | 0.638362   | 0.33597872 | -0.3023833 | DHX30     | Homo sapiens DEAD/H (Asp-Glu-Ala-His) box helicase 30 (DHX30), transcript variant 1, mRNA. (from RefSeq NM_138615)               |
| uc058xkw.1 | 6.03E-04 | DOWN | 1.4960788 | 1.4960788  | 0.5811862  | 0.79466057 | 0.21347432 | DIS3      | Homo sapiens DIS3 exosome endoribonuclease and 3'-5' exoribonuclease (DIS3), transcript variant 1, mRNA. (from RefSeq NM_014953) |
| uc061cxr.1 | 4.42E-04 | DOWN | 3.4806626 | 3.4806626  | 1.799362   | -2.874132  | -4.673494  | DNAAF3    | Homo sapiens dynein, axonemal, assembly factor 3 (DNAAF3), transcript variant 1, mRNA. (from RefSeq NM_001256714)                |
| uc062eiv.1 | 2.90E-04 | DOWN | 1.9544363 | 1.9544363  | 0.9667525  | 0.49695006 | -0.4698025 | DNAL4     | Homo sapiens dynein, axonemal, light chain 4 (DNAL4), mRNA. (from RefSeq NM_005740)                                              |
| uc059zkr.1 | 2.37E-04 | DOWN | 1.7925972 | 1.7925972  | 0.8420513  | 1.6935285  | 0.8514772  | DPH1      | Homo sapiens diphthamide biosynthesis 1 (DPH1), mRNA. (from RefSeq NM_001383)                                                    |
| uc063iju.1 | 3.26E-04 | DOWN | 3.0620632 | 3.0620632  | 1.6145041  | -2.5977495 | -4.2122536 | DPYSL3    | Homo sapiens dihydropyrimidinase-like 3 (DPYSL3), transcript variant 2, mRNA. (from RefSeq NM_001387)                            |
| uc002kwk.5 | 4.97E-04 | UP   | 1.5694616 | -1.5694616 | -0.6502697 | 2.0402553  | 2.690525   | DSC2      | Homo sapiens desmocollin 2 (DSC2), transcript variant Dsc2b, mRNA. (from RefSeq NM_004949)                                       |
| uc059jbx.1 | 9.32E-04 | DOWN | 2.828315  | 2.828315   | 1.4999428  | -0.5355427 | -2.0354855 | DTWD1     | Homo sapiens DTW domain containing 1 (DTWD1), transcript variant 2, mRNA. (from RefSeq NM_001144955)                             |
| uc060sdo.1 | 9.03E-04 | DOWN | 1.3031578 | 1.3031578  | 0.3820118  | 0.08413836 | -0.2978735 | DUS3L     | Homo sapiens dihydrouridine synthase 3-like (S. cerevisiae) (DUS3L), transcript variant 1, mRNA. (from RefSeq NM_020175)         |
| uc060sds.1 | 2.85E-04 | DOWN | 1.4717858 | 1.4717858  | 0.5575677  | 0.5148777  | -0.0426907 | DUS3L     | Homo sapiens dihydrouridine synthase 3-like (S. cerevisiae) (DUS3L), transcript variant 1, mRNA. (from RefSeq NM_020175)         |
| uc010wnn.2 | 2.46E-04 | DOWN | 1.2284846 | 1.2284846  | 0.2968798  | 3.522628   | 3.2257483  | DYNLL2    | Homo sapiens dynein, light chain, LC8-type 2 (DYNLL2), mRNA. (from RefSeq NM_080677)                                             |
| uc060ttv.1 | 6.18E-04 | DOWN | 1.3899735 | 1.3899735  | 0.4750574  | 0.64705426 | 0.1719969  | ECSIT     | Homo sapiens ECSIT signalling integrator (ECSIT), transcript variant 3, mRNA. (from RefSeq NM_0011424265)                        |
| uc059fjp.1 | 7.23E-04 | DOWN | 1.3500446 | 1.3500446  | 0.43300706 | 0.6690862  | 0.23607916 | EIF5      | Homo sapiens eukaryotic translation initiation factor 5 (EIF5), transcript variant 1, mRNA. (from RefSeq NM_001969)              |
| uc064zht.1 | 6.55E-04 | DOWN | 3.4123712 | 3.4123712  | 1.7707746  | -2.9005659 | -4.6713405 | ELN       | Homo sapiens elastin (ELN), transcript variant 3, mRNA. (from RefSeq NM_001081753)                                               |
| uc057wfo.1 | 8.12E-04 | DOWN | 2.9038887 | 2.9038887  | 1.5379862  | -0.2584959 | -1.7964821 | EMX2OS    | Homo sapiens EMX2 opposite strand/antisense RNA (EMX2OS), long non-coding RNA. (from RefSeq NR_002791)                           |
| uc062xsy.1 | 9.11E-04 | DOWN | 1.4225762 | 1.4225762  | 0.50850594 | 1.066101   | 0.557595   | ENOPH1    | Homo sapiens enolase-phosphatase 1 (ENOPH1), transcript variant 1, mRNA. (from RefSeq NM_0212204)                                |
| uc062xsz.1 | 9.13E-04 | DOWN | 1.2292796 | 1.2292796  | 0.29781315 | 0.61124355 | 0.31343034 | ENOPH1    | Homo sapiens enolase-phosphatase 1 (ENOPH1), transcript variant 2, mRNA. (from RefSeq NM_001292017)                              |
| uc060mtq.1 | 5.20E-04 | DOWN | 1.3539106 | 1.3539106  | 0.43713245 | 0.26639283 | -0.1707396 | ENOSF1    | Homo sapiens enolase superfamily member 1 (ENOSF1), transcript variant 2, mRNA. (from RefSeq NM_001126123)                       |
| uc065bcs.1 | 4.02E-04 | DOWN | 1.4150074 | 1.4150074  | 0.50080955 | -0.0309631 | -0.5317727 | ENOX2     | Homo sapiens ecto-NOX disulfide-thiol exchanger 2 (ENOX2), transcript variant 1, mRNA. (from RefSeq NM_006375)                   |
| uc058vib.1 | 7.03E-04 | DOWN | 1.2665782 | 1.2665782  | 0.34093615 | 0.23307593 | -0.1078602 | EP400     | Homo sapiens E1A binding protein p400 (EP400), mRNA. (from RefSeq NM_015409)                                                     |

|            |          |      |           |           |            |            |            |         |                                                                                                                                       |
|------------|----------|------|-----------|-----------|------------|------------|------------|---------|---------------------------------------------------------------------------------------------------------------------------------------|
| uc063rjd.1 | 3.70E-04 | DOWN | 1.5517591 | 1.5517591 | 0.63390464 | -1.7924179 | -2.4263225 | EPB41L2 | Homo sapiens erythrocyte membrane protein band 4.1-like 2 (EPB41L2), transcript variant 2, mRNA. (from RefSeq NM_001135555)           |
| uc064iwe.1 | 3.28E-04 | DOWN | 1.3043476 | 1.3043476 | 0.3833284  | 0.30906773 | -0.0742608 | EPHA1   | Homo sapiens EPH receptor A1 (EPHA1), mRNA. (from RefSeq NM_005232)                                                                   |
| uc060uys.1 | 3.92E-04 | DOWN | 1.2193388 | 1.2193388 | 0.28609902 | 1.4997584  | 1.2136594  | EPS15L1 | Homo sapiens epidermal growth factor receptor pathway substrate 15-like 1 (EPS15L1), transcript v. NM_001258375                       |
| uc060vkb.1 | 1.79E-04 | DOWN | 1.4217726 | 1.4217726 | 0.5076907  | 0.02209011 | -0.4856006 | FAM129C | Homo sapiens family with sequence similarity 129, member C (FAM129C), transcript variant 2, mRNA. (from RefSeq NM_001098524)          |
| uc060vkc.1 | 4.39E-04 | DOWN | 1.3720957 | 1.3720957 | 0.4563811  | -0.1605814 | -0.6169626 | FAM129C | Homo sapiens family with sequence similarity 129, member C (FAM129C), transcript variant 2, mRNA. (from RefSeq NM_001098524)          |
| uc057bod.1 | 4.52E-05 | DOWN | 4.2857165 | 4.2857165 | 2.0995364  | -4.4922795 | -6.591816  | FAM213B | Homo sapiens family with sequence similarity 213, member B (FAM213B), transcript variant 2, mRNA. (from RefSeq NM_152371)             |
| uc061fvb.1 | 4.52E-05 | DOWN | 4.2857165 | 4.2857165 | 2.0995364  | -4.4922795 | -6.591816  | FAM213B | Homo sapiens family with sequence similarity 213, member B (FAM213B), transcript variant 2, mRNA. (from RefSeq NM_152371)             |
| uc064tfh.1 | 2.82E-04 | DOWN | 2.5153918 | 2.5153918 | 1.3307831  | -2.90459   | -4.235373  | FAM95B1 | Homo sapiens family with sequence similarity 95, member B1 (FAM95B1), long non-coding RNA. (from RefSeq NR_026759)                    |
| uc002rpa.2 | 8.82E-04 | DOWN | 1.2223758 | 1.2223758 | 0.2896878  | 0.0637974  | -0.2258904 | FAM98A  | Homo sapiens family with sequence similarity 98, member A (FAM98A), transcript variant 1, mRNA. (from RefSeq NM_015475)               |
| uc010jnv.2 | 9.66E-04 | DOWN | 1.2734643 | 1.2734643 | 0.34875855 | 0.6780751  | 0.32931653 | FARS2   | Homo sapiens phenylalanyl-tRNA synthetase 2, mitochondrial (FARS2), mRNA. (from RefSeq NM_00106567)                                   |
| uc060lwd.1 | 4.84E-04 | DOWN | 1.5184833 | 1.5184833 | 0.60263103 | 0.78219837 | 0.17956735 | FASN    | Homo sapiens fatty acid synthase (FASN), mRNA. (from RefSeq NM_004104)                                                                |
| uc060ynr.1 | 6.15E-04 | DOWN | 1.4972541 | 1.4972541 | 0.5823191  | 1.4468273  | 0.86450815 | FBL     | Homo sapiens fibrillarin (FBL), mRNA. (from RefSeq NM_001436)                                                                         |
| uc058ttr.1 | 4.78E-04 | DOWN | 1.3824271 | 1.3824271 | 0.4672034  | 0.706743   | 0.23953962 | FBXO21  | Homo sapiens F-box protein 21 (FBXO21), transcript variant 1, mRNA. (from RefSeq NM_033624)                                           |
| uc060suj.1 | 6.55E-04 | DOWN | 1.3777107 | 1.3777107 | 0.46227297 | 0.07015614 | -0.3921169 | FCER2   | Homo sapiens Fc fragment of IgE, low affinity II, receptor for (CD23) (FCER2), transcript variant 1, mRNA. (from RefSeq NM_002002)    |
| uc060sqm.1 | 5.48E-04 | DOWN | 1.4911617 | 1.4911617 | 0.5764367  | 0.11143559 | -0.4650012 | FCER2   | Homo sapiens Fc fragment of IgE, low affinity II, receptor for (CD23) (FCER2), transcript variant 1, mRNA. (from RefSeq NM_002002)    |
| uc058fep.1 | 1.75E-04 | DOWN | 1.4564477 | 1.4564477 | 0.5424539  | 0.4302286  | -0.1122253 | FCHSD2  | Homo sapiens FCH and double SH3 domains 2 (FCHSD2), mRNA. (from RefSeq NM_014824)                                                     |
| uc064glm.1 | 1.00E-04 | DOWN | 1.4015203 | 1.4015203 | 0.4869926  | 1.3968903  | 0.90989774 | FIS1    | Homo sapiens fission 1 (mitochondrial outer membrane) homolog (S. cerevisiae) (FIS1), mRNA. (from RefSeq NM_016068)                   |
| uc003djj.3 | 2.21E-04 | DOWN | 1.2875259 | 1.2875259 | 0.36760143 | -0.1843731 | -0.5489746 | FLNB    | Homo sapiens filamin B, beta (FLNB), transcript variant 2, mRNA. (from RefSeq NM_001457)                                              |
| uc003djk.3 | 2.56E-04 | DOWN | 1.2852204 | 1.2852204 | 0.36201575 | -0.181928  | -0.5439437 | FLNB    | Homo sapiens filamin B, beta (FLNB), transcript variant 3, mRNA. (from RefSeq NM_001164318)                                           |
| uc003djm.3 | 9.95E-04 | DOWN | 1.2445667 | 1.2445667 | 0.31564352 | -0.159998  | -0.4756416 | FLNB    | Homo sapiens filamin B, beta (FLNB), transcript variant 4, mRNA. (from RefSeq NM_001164319)                                           |
| uc010hne.3 | 5.21E-04 | DOWN | 1.3080819 | 1.3080819 | 0.38745284 | -0.1450327 | -0.5324855 | FLNB    | Homo sapiens filamin B, beta (FLNB), transcript variant 1, mRNA. (from RefSeq NM_001164317)                                           |
| uc010hnf.3 | 2.03E-04 | DOWN | 1.29133   | 1.29133   | 0.3688577  | -0.1743539 | -0.5432116 | FLNB    | Homo sapiens filamin B, beta (FLNB), transcript variant 4, mRNA. (from RefSeq NM_001164319)                                           |
| uc062kyo.1 | 5.42E-04 | DOWN | 1.1885079 | 1.1885079 | 0.24915151 | -0.0901803 | -0.3393317 | FLNB    | Homo sapiens filamin B, beta (FLNB), transcript variant 4, mRNA. (from RefSeq NM_001164319)                                           |
| uc059prq.1 | 8.53E-04 | DOWN | 1.2842814 | 1.2842814 | 0.36096132 | -0.7828972 | -1.1438586 | FLYWCH1 | Homo sapiens FLYWCH-type zinc finger 1 (FLYWCH1), transcript variant 1, mRNA. (from RefSeq NM_0032296)                                |
| uc064muv.1 | 7.62E-04 | DOWN | 1.3168805 | 1.3168805 | 0.39712438 | 0.43809152 | 0.0409671  | FNTA    | Homo sapiens farnesyltransferase, CAAX box, alpha (FNTA), transcript variant 1, mRNA. (from RefSeq NM_002027)                         |
| uc064vxp.1 | 8.95E-04 | DOWN | 1.3649472 | 1.3649472 | 0.44884515 | -0.9141061 | -1.3629512 | FPGS    | Homo sapiens folylpolyglutamate synthase (FPGS), transcript variant 1, mRNA. (from RefSeq NM_0004957)                                 |
| uc064vyr.1 | 2.34E-04 | DOWN | 1.4879673 | 1.4879673 | 0.57334274 | -0.9706222 | -1.543965  | FPGS    | Homo sapiens folylpolyglutamate synthase (FPGS), transcript variant 1, mRNA. (from RefSeq NM_0004957)                                 |
| uc058djl.1 | 6.44E-04 | DOWN | 1.4106445 | 1.4106445 | 0.4963545  | 0.21383233 | -0.2825221 | FRMD8   | Homo sapiens FERM domain containing 8 (FRMD8), transcript variant 1, mRNA. (from RefSeq NM_0031904)                                   |
| uc058djm.1 | 3.80E-04 | DOWN | 1.4113189 | 1.4113189 | 0.497044   | 0.4372523  | -0.0597917 | FRMD8   | Homo sapiens FERM domain containing 8 (FRMD8), transcript variant 2, mRNA. (from RefSeq NM_00103300832)                               |
| uc060atq.1 | 1.75E-04 | DOWN | 1.3747438 | 1.3747438 | 0.4591628  | 2.0954998  | 1.6363369  | FXR2    | Homo sapiens fragile X mental retardation, autosomal homolog 2 (FXR2), mRNA. (from RefSeq NM_004860)                                  |
| uc062daw.1 | 6.98E-04 | DOWN | 1.2820716 | 1.2820716 | 0.35847682 | -1.822708  | -2.1811848 | GATSL3  | Homo sapiens GATS protein-like 3 (GATSL3), mRNA. (from RefSeq NM_001037666)                                                           |
| uc062dbe.1 | 8.67E-04 | DOWN | 2.6110659 | 2.6110659 | 1.3846388  | -0.7264488 | -1.2110876 | GATSL3  | Homo sapiens GATS protein-like 3 (GATSL3), mRNA. (from RefSeq NM_001037666)                                                           |
| uc058tzd.1 | 5.97E-04 | DOWN | 1.3484395 | 1.3484395 | 0.43129075 | 0.9592147  | 0.5279239  | GCN1L1  | Homo sapiens GCN1 general control of amino-acid synthesis 1-like 1 (yeast) (GCN1L1), mRNA. (from RefSeq NM_006836)                    |
| uc063ymk.1 | 9.71E-04 | DOWN | 1.2795461 | 1.2795461 | 0.35563216 | -1.1937543 | -1.5493865 | GNL1    | Homo sapiens guanine nucleotide binding protein-like 1 (GNL1), mRNA. (from RefSeq NM_005275)                                          |
| uc002whp.2 | 9.74E-04 | DOWN | 3.1071494 | 3.1071494 | 1.6355916  | -1.011351  | -2.6469426 | GNRH2   | Homo sapiens gonadotropin-releasing hormone 2 (GNRH2), transcript variant 3, mRNA. (from RefSeq NM_178331)                            |
| uc057dtw.1 | 1.33E-04 | DOWN | 1.5824472 | 1.5824472 | 0.66215736 | -0.1753319 | -0.8374892 | GPATCH3 | Homo sapiens G patch domain containing 3 (GPATCH3), mRNA. (from RefSeq NM_022078)                                                     |
| uc063ixf.1 | 3.28E-04 | DOWN | 2.7667317 | 2.7667317 | 1.4681828  | -3.18731   | -4.655493  | GRIA1   | Homo sapiens glutamate receptor, ionotropic, AMPA 1 (GRIA1), transcript variant 7, mRNA. (from RefSeq NM_001258023)                   |
| uc057idf.1 | 7.14E-04 | DOWN | 1.5648838 | 1.5648838 | 0.6460556  | 0.6933504  | 0.04729484 | GTF2B   | Homo sapiens general transcription factor IIB (GTF2B), mRNA. (from RefSeq NM_001514)                                                  |
| uc058waz.1 | 9.32E-04 | DOWN | 1.4175823 | 1.4175823 | 0.50343245 | 1.590342   | 1.0869095  | GTF3A   | Homo sapiens general transcription factor IIIA (GTF3A), mRNA. (from RefSeq NM_002097)                                                 |
| uc064wsm.1 | 5.19E-04 | DOWN | 1.3935853 | 1.3935853 | 0.47880134 | 0.7353887  | 0.25658733 | GTF3C4  | Homo sapiens general transcription factor IIIC, polypeptide 4, 90kDa (GTF3C4), mRNA. (from RefSeq NM_012204)                          |
| uc004cci.5 | 7.15E-04 | DOWN | 1.2272269 | 1.2272269 | 0.29540196 | 0.06520756 | -0.2301944 | GTF3C5  | Homo sapiens general transcription factor IIIC, polypeptide 5, 63kDa (GTF3C5), transcript variant 2, mRNA. (from RefSeq NM_012087)    |
| uc033dju.2 | 4.19E-04 | DOWN | 1.2532845 | 1.2532845 | 0.3257139  | -0.0266291 | -0.352343  | GTF3C5  | Homo sapiens general transcription factor IIIC, polypeptide 5, 63kDa (GTF3C5), transcript variant 3, mRNA. (from RefSeq NM_001286709) |
| uc057reu.1 | 8.73E-04 | DOWN | 1.4814469 | 1.4814469 | 0.5670069  | 1.2631001  | 0.69609326 | GTPBP4  | Homo sapiens GTP binding protein 4 (GTPBP4), mRNA. (from RefSeq NM_012341)                                                            |
| uc062kga.1 | 5.79E-04 | DOWN | 1.3277055 | 1.3277055 | 0.40893516 | -1.03673   | -1.4456652 | HEMK1   | Homo sapiens HemK methyltransferase family member 1 (HEMK1), mRNA. (from RefSeq NM_0161173)                                           |
| uc061aff.1 | 4.05E-04 | DOWN | 5.606754  | 5.606754  | 2.4871657  | -2.5747898 | -5.0619555 | HIF3A   | Homo sapiens hypoxia inducible factor 3, alpha subunit (HIF3A), transcript variant 4, mRNA. (from RefSeq NM_152796)                   |
| uc001udj.2 | 3.14E-04 | DOWN | 1.3390192 | 1.3390192 | 0.4211766  | 1.4725891  | 1.0514125  | HIP1R   | Homo sapiens huntingtin interacting protein 1 related (HIP1R), transcript variant 1, mRNA. (from RefSeq NM_003959)                    |
| uc058uor.1 | 1.81E-04 | DOWN | 1.3555408 | 1.3555408 | 0.4388685  | 0.32607898 | -0.1127895 | HIP1R   | Homo sapiens huntingtin interacting protein 1 related (HIP1R), transcript variant 1, mRNA. (from RefSeq NM_003959)                    |
| uc058uot.1 | 8.22E-04 | DOWN | 1.376099  | 1.376099  | 0.46058425 | 0.25862607 | -0.2019582 | HIP1R   | Homo sapiens huntingtin interacting protein 1 related (HIP1R), transcript variant 1, mRNA. (from RefSeq NM_003959)                    |
| uc057zqa.1 | 7.13E-04 | DOWN | 1.2905959 | 1.2905959 | 0.36803734 | -0.5494239 | -0.9174612 | HP55    | Homo sapiens Hermansky-Pudlak syndrome 5 (HP55), transcript variant 3, mRNA. (from RefSeq NM_181508)                                  |
| uc063gye.1 | 6.47E-04 | DOWN | 1.553354  | 1.553354  | 0.63538665 | 1.3144798  | 0.6790931  | HSPA4   | Homo sapiens heat shock 70kDa protein 4 (HSPA4), mRNA. (from RefSeq NM_002154)                                                        |
| uc057uwb.1 | 7.47E-04 | DOWN | 1.2488009 | 1.2488009 | 0.32054344 | 0.2864841  | -0.0340594 | IDE     | Homo sapiens insulin-degrading enzyme (IDE), transcript variant 2, mRNA. (from RefSeq NM_00116165946)                                 |
| uc064sma.1 | 8.58E-04 | DOWN | 1.7223176 | 1.7223176 | 0.78435117 | -0.1169544 | -0.9013056 | IFT74   | Homo sapiens intraflagellar transport 74 (IFT74), transcript variant 4, mRNA. (from RefSeq NM_001001099224)                           |
| uc058pgk.1 | 1.65E-04 | DOWN | 3.3863482 | 3.3863482 | 1.7597303  | -2.6947336 | -4.454464  | IKZF4   | Homo sapiens IKAROS family zinc finger 4 (Eos) (IKZF4), mRNA. (from RefSeq NM_022465)                                                 |

|            |          |      |           |           |            |            |            |           |                                                                                                                 |              |
|------------|----------|------|-----------|-----------|------------|------------|------------|-----------|-----------------------------------------------------------------------------------------------------------------|--------------|
| uc060tla.1 | 6.58E-04 | DOWN | 1.2897521 | 1.2897521 | 0.36709383 | 0.50788546 | 0.14079161 | ILF3      | Homo sapiens interleukin enhancer binding factor 3, 90kDa (ILF3), transcript variant 4, mRNA. (from NM_017620   |              |
| uc060urt.1 | 2.12E-04 | DOWN | 1.5014273 | 1.5014273 | 0.5863346  | -1.6479577 | -2.2342923 | ILVBL     | Homo sapiens ilvB (bacterial acetolactate synthase)-like (ILVBL), mRNA. (from RefSeq NM_006844)                 | NM_006844    |
| uc057wqx.1 | 8.12E-04 | DOWN | 1.4821254 | 1.4821254 | 0.5676675  | 0.66837925 | 0.10071168 | INPP5A    | Homo sapiens inositol polyphosphate-5-phosphatase, 40kDa (INPP5A), mRNA. (from RefSeq NM_00                     | NM_005539    |
| uc065cai.1 | 9.36E-04 | DOWN | 1.3765228 | 1.3765228 | 0.4610285  | 0.7418396  | 0.28081113 | IRAK1     | Homo sapiens interleukin-1 receptor-associated kinase 1 (IRAK1), transcript variant 2, mRNA. (from NM_001025242 |              |
| uc057sqo.1 | 8.11E-04 | DOWN | 1.2761558 | 1.2761558 | 0.3518045  | 0.99496365 | 0.64315915 | ITGB1     | Homo sapiens integrin, beta 1 (fibronectin receptor, beta polypeptide, antigen CD29 includes MDF2,              | NM_033668    |
| uc061nqc.1 | 2.18E-04 | DOWN | 1.3883929 | 1.3883929 | 0.4734159  | 0.34611484 | -0.1273011 | IWS1      | Homo sapiens IWS1 homolog (S. cerevisiae) (IWS1), mRNA. (from RefSeq NM_017969)                                 | NM_017969    |
| uc063hbu.1 | 3.33E-04 | DOWN | 1.3825978 | 1.3825978 | 0.46738154 | 1.1864761  | 0.7190946  | JADE2     | Homo sapiens jade family PHD finger 2 (JADE2), transcript variant 3, mRNA. (from RefSeq NM_015                  | NM_015288    |
| uc063hbu.1 | 9.85E-05 | DOWN | 1.6018566 | 1.6018566 | 0.67974496 | 0.4113808  | -0.2683642 | JADE2     | Homo sapiens jade family PHD finger 2 (JADE2), transcript variant 3, mRNA. (from RefSeq NM_015                  | NM_015288    |
| uc061lwd.1 | 4.05E-04 | DOWN | 1.5455755 | 1.5455755 | 0.62814415 | -0.2712648 | -0.8994089 | KANSL3    | Homo sapiens KAT8 regulatory NSL complex subunit 3 (KANSL3), transcript variant 7, non-coding RN                | NR_047658    |
| uc058dom.1 | 7.30E-04 | DOWN | 1.2990743 | 1.2990743 | 0.37748393 | -0.4537181 | -0.831202  | KAT5      | Homo sapiens K(llysine) acetyltransferase 5 (KAT5), transcript variant 2, mRNA. (from RefSeq NM_0               | NM_006388    |
| uc060jxt.1 | 5.19E-04 | DOWN | 1.8570356 | 1.8570356 | 0.8930015  | -0.7108379 | -1.6038394 | KIAA0195  | Homo sapiens KIAA0195 (KIAA0195), mRNA. (from RefSeq NM_014738)                                                 | NM_014738    |
| uc059auf.1 | 5.86E-04 | DOWN | 1.333917  | 1.333917  | 0.4156689  | -0.4526337 | -0.8683025 | KIAA0391  | Homo sapiens KIAA0391 (KIAA0391), transcript variant 2, mRNA. (from RefSeq NM_001256678)                        | NM_001256678 |
| uc059bik.1 | 5.09E-04 | DOWN | 1.456567  | 1.456567  | 0.5425721  | -1.3735608 | -1.9161329 | L2HGDH    | Homo sapiens L-2-hydroxyglutarate dehydrogenase (L2HGDH), mRNA. (from RefSeq NM_024884)                         | NM_024884    |
| uc011cfk.3 | 3.76E-04 | DOWN | 1.3542188 | 1.3542188 | 0.4374609  | 1.3142334  | 0.87677246 | LEF1      | Homo sapiens lymphoid enhancer-binding factor 1 (LEF1), transcript variant 4, mRNA. (from RefSeq NM_0011666119  |              |
| uc057otb.1 | 7.08E-04 | DOWN | 2.4232428 | 2.4232428 | 1.2769389  | -1.8144094 | -3.0913484 | LEMD1     | Homo sapiens LEM domain containing 1 (LEMD1), transcript variant 4, mRNA. (from RefSeq NM_00                    | NM_001199052 |
| uc057otc.1 | 9.06E-04 | DOWN | 2.3645246 | 2.3645246 | 1.2415501  | -1.8387089 | -3.080259  | LEMD1     | Homo sapiens LEM domain containing 1 (LEMD1), transcript variant 4, mRNA. (from RefSeq NM_00                    | NM_001199052 |
| uc058ujc.1 | 8.13E-04 | DOWN | 1.5301507 | 1.5301507 | 0.6136737  | 0.20963831 | -0.4040354 | LINC01089 | Homo sapiens long intergenic non-protein coding RNA 1089 (LINC01089), long non-coding RNA. (fro                 | NR_002809    |
| uc057lwf.1 | 7.53E-04 | DOWN | 1.3924829 | 1.3924829 | 0.47765958 | -0.5281399 | -1.0052795 | LMNA      | Homo sapiens lamin A/C (LMNA), transcript variant 3, mRNA. (from RefSeq NM_170708)                              | NM_170708    |
| uc058bpn.1 | 8.80E-04 | DOWN | 1.465787  | 1.465787  | 0.5516755  | 2.4074094  | 1.8557339  | LPXN      | Homo sapiens leupaxin (LPXN), transcript variant 2, mRNA. (from RefSeq NM_004811)                               | NM_004811    |
| uc063ady.1 | 2.43E-04 | DOWN | 1.4906352 | 1.4906352 | 0.5759272  | 0.6129604  | 0.03703318 | LRBA      | Homo sapiens LPS-responsive vesicle trafficking, beach and anchor containing (LRBA), transcript vari            | NM_006726    |
| uc058kne.1 | 6.80E-04 | DOWN | 2.0665438 | 2.0665438 | 1.04722    | -1.6357126 | -2.6829326 | LRRC23    | Homo sapiens leucine rich repeat containing 23 (LRRC23), transcript variant 2, mRNA. (from RefSeq NM_006992     |              |
| uc001akx.2 | 5.95E-04 | DOWN | 1.1888478 | 1.1888478 | 0.249564   | 2.672828   | 2.423264   | LRRC47    | Homo sapiens leucine rich repeat containing 47 (LRRC47), mRNA. (from RefSeq NM_020710)                          | NM_020710    |
| uc064cq.1  | 7.30E-04 | DOWN | 1.5036224 | 1.5036224 | 0.5884423  | -0.5690464 | -1.1574887 | LSMS5     | Homo sapiens LSM5 homolog, U6 small nuclear RNA associated (S. cerevisiae) (LSMS5), transcript va               | NM_012322    |
| uc057vlt.1 | 5.84E-04 | DOWN | 1.4735569 | 1.4735569 | 0.55930275 | -0.6038199 | -1.1631227 | LZTS2     | Homo sapiens leucine zipper, putative tumor suppressor 2 (LZTS2), mRNA. (from RefSeq NM_03242                   | NM_032422    |
| uc059ian.1 | 4.97E-04 | DOWN | 1.4599111 | 1.4599111 | 0.5458805  | -0.4585696 | -1.0044502 | MAPKBP1   | Homo sapiens mitogen-activated protein kinase binding protein 1 (MAPKBP1), transcript variant 3, n              | NM_001265611 |
| uc003fle.4 | 4.63E-04 | DOWN | 1.2460678 | 1.2460678 | 0.3173825  | -1.1091388 | -1.4265214 | MCCC1     | Homo sapiens methylcrotonoyl-CoA carboxylase 1 (alpha) (MCCC1), transcript variant 1, mRNA. (fro                | NM_020166    |
| uc062qnd.1 | 5.07E-04 | DOWN | 1.2288607 | 1.2288607 | 0.2973214  | -1.1339347 | -1.4312562 | MCCC1     | Homo sapiens methylcrotonoyl-CoA carboxylase 1 (alpha) (MCCC1), transcript variant 1, mRNA. (fro                | NM_020166    |
| uc062qne.1 | 3.54E-04 | DOWN | 1.240623  | 1.240623  | 0.31106478 | -1.1042471 | -1.4153118 | MCCC1     | Homo sapiens methylcrotonoyl-CoA carboxylase 1 (alpha) (MCCC1), transcript variant 1, mRNA. (fro                | NM_020166    |
| uc003pnn.2 | 7.47E-04 | DOWN | 1.2560745 | 1.2560745 | 0.3289221  | 1.6296577  | 1.3007356  | MDN1      | Homo sapiens MDN1, midasin homolog (yeast) (MDN1), mRNA. (from RefSeq NM_014611)                                | NM_014611    |
| uc063qcd.1 | 9.47E-04 | DOWN | 1.3042611 | 1.3042611 | 0.38323268 | 1.5583802  | 1.1751475  | MDN1      | Homo sapiens MDN1, midasin homolog (yeast) (MDN1), mRNA. (from RefSeq NM_014611)                                | NM_014611    |
| uc062pue.1 | 1.81E-04 | DOWN | 4.079837  | 4.079837  | 2.0285115  | -4.594736  | -6.6232476 | MECOM     | Homo sapiens MDS1 and EVI1 complex locus (MECOM), transcript variant 3, mRNA. (from RefSeq N                    | NM_001105078 |
| uc064ged.1 | 2.79E-04 | DOWN | 1.4110893 | 1.4110893 | 0.49680927 | 0.7099866  | 0.21317732 | MEPCE     | Homo sapiens methylphosphate capping enzyme (MEPCE), transcript variant 4, mRNA. (from RefSe                    | NM_001194992 |
| uc059znk.1 | 6.16E-04 | DOWN | 1.3454988 | 1.3454988 | 0.4281411  | -0.032758  | -0.4608991 | METTL16   | Homo sapiens methyltransferase like 16 (METTL16), mRNA. (from RefSeq NM_024086)                                 | NM_024086    |
| uc060ccx.1 | 8.12E-04 | DOWN | 1.4379041 | 1.4379041 | 0.52396744 | -1.4459757 | -1.9699432 | MIEF2     | Homo sapiens mitochondrial elongation factor 2 (MIEF2), transcript variant 1, mRNA. (from RefSeq                | NM_139162    |
| uc064bkt.1 | 3.14E-04 | DOWN | 1.4664329 | 1.4664329 | 0.55231106 | 0.43986157 | -0.1124495 | MIOS      | Homo sapiens missing oocyte, meiosis regulator, homolog (Drosophila) (MIOS), mRNA. (from RefSe                  | NM_019005    |
| uc058vgw.1 | 3.97E-05 | DOWN | 1.7731789 | 1.7731789 | 0.8263381  | -1.2798477 | -2.106186  | MMP17     | Homo sapiens matrix metalloproteinase 17 (membrane-inserted) (MMP17), mRNA. (from RefSeq NI                     | NM_016155    |
| uc057vfm.1 | 6.57E-04 | DOWN | 1.3661103 | 1.3661103 | 0.450074   | 0.26967993 | -0.180394  | MMS19     | Homo sapiens MMS19 nucleotide excision repair homolog (S. cerevisiae) (MMS19), transcript variar                | NM_001289403 |
| uc059lni.1 | 5.86E-04 | DOWN | 1.6071565 | 1.6071565 | 0.6845104  | -0.0592606 | -0.7437711 | MPI       | Homo sapiens mannose phosphate isomerase (MPI), transcript variant 2, mRNA. (from RefSeq NM_                    | NM_001289155 |
| uc060fve.1 | 7.30E-04 | DOWN | 4.313879  | 4.313879  | 2.1089857  | -3.324458  | -5.4334435 | MPP2      | Homo sapiens membrane protein, palmitoylated 2 (MAGUK p55 subfamily member 2) (MPP2), tran                      | NM_001278381 |
| uc059mwq.1 | 3.05E-04 | DOWN | 1.7236552 | 1.7236552 | 0.7854712  | -1.5743408 | -2.359812  | MRPL46    | Homo sapiens mitochondrial ribosomal protein L46 (MRPL46), mRNA. (from RefSeq NM_022163)                        | NM_022163    |
| uc001yqy.4 | 4.37E-04 | DOWN | 1.2514856 | 1.2514856 | 0.32364166 | -0.9097973 | -1.233439  | MTA1      | Homo sapiens metastasis associated 1 (MTA1), transcript variant 2, mRNA. (from RefSeq NM_0012                   | NM_001203258 |
| uc061ipp.1 | 9.01E-04 | DOWN | 2.817037  | 2.817037  | 1.4941785  | -2.2645373 | -3.7587159 | MTA3      | Homo sapiens metastasis associated 1 family, member 3 (MTA3), transcript variant 3, mRNA. (from                 | NM_020744    |
| uc057dns.1 | 9.79E-04 | DOWN | 1.446597  | 1.446597  | 0.53266305 | -0.863583  | -1.3962461 | MTFR1L    | Homo sapiens mitochondrial fission regulator 1-like (MTFR1L), transcript variant 1, mRNA. (from                 | Re NM_019557 |
| uc063sgp.1 | 7.58E-04 | DOWN | 4.284698  | 4.284698  | 2.0991936  | -1.3402783 | -3.439472  | MTHFD1L   | Homo sapiens methylenetetrahydrofolate dehydrogenase (NADP+ dependent) 1-like (MTHFD1L), tra                    | NM_001242768 |
| uc058xpe.1 | 8.43E-04 | DOWN | 1.3325596 | 1.3325596 | 0.41420004 | 4.2407594  | 3.8265593  | MYCBP2    | Homo sapiens MYC binding protein 2, E3 ubiquitin protein ligase (MYCBP2), mRNA. (from RefSeq NI                 | NM_015057    |
| uc001udy.2 | 4.55E-04 | DOWN | 1.3060995 | 1.3060995 | 0.38526484 | -2.370269  | -2.755534  | n/a       | n/a                                                                                                             | NM_001304835 |
| uc002gnz.5 | 2.10E-04 | DOWN | 1.3026936 | 1.3026936 | 0.3814978  | -0.1807804 | -0.5622781 | n/a       | n/a                                                                                                             | NM_018127    |
| uc002iii.2 | 1.67E-04 | DOWN | 1.4330951 | 1.4330951 | 0.51913434 | -0.6375163 | -1.1566507 | n/a       | n/a                                                                                                             | NM_001303442 |
| uc003zjz.4 | 5.30E-04 | DOWN | 1.2690427 | 1.2690427 | 0.34374064 | 0.7658224  | 0.4220818  | n/a       | n/a                                                                                                             | NR_046386    |
| uc010dzm.2 | 8.73E-04 | DOWN | 1.3376595 | 1.3376595 | 0.4197109  | -0.3204994 | -0.7402104 | n/a       | n/a                                                                                                             | NR_046366    |
| uc010lyy.3 | 9.18E-04 | DOWN | 1.3024448 | 1.3024448 | 0.38122225 | 0.2236887  | -0.1575335 | n/a       | n/a                                                                                                             | NM_001271287 |
| uc032qsv.2 | 6.25E-04 | DOWN | 1.2440816 | 1.2440816 | 0.31508112 | -2.0031366 | -2.3182178 | n/a       | n/a                                                                                                             | NR_034118    |
| uc032qyp.2 | 4.80E-04 | DOWN | 1.248422  | 1.248422  | 0.3201057  | -1.9956144 | -2.31572   | n/a       | n/a                                                                                                             | NR_034118    |

|            |          |      |           |           |            |            |            |         |                                                                                                                                               |              |
|------------|----------|------|-----------|-----------|------------|------------|------------|---------|-----------------------------------------------------------------------------------------------------------------------------------------------|--------------|
| uc032tgw.1 | 3.46E-04 | DOWN | 1.3213444 | 1.3213444 | 0.4020065  | -0.0667328 | -0.4687394 | n/a     | n/a                                                                                                                                           | NM_001278363 |
| uc057hsg.1 | 2.08E-04 | DOWN | 1.3992146 | 1.3992146 | 0.48461726 | -0.562811  | -1.0474283 | n/a     | n/a                                                                                                                                           | NR_073562    |
| uc057oir.1 | 6.77E-04 | DOWN | 1.4009339 | 1.4009339 | 0.48638883 | -0.2627614 | -0.7491502 | n/a     | n/a                                                                                                                                           | NM_001193570 |
| uc058tuf.1 | 2.47E-04 | DOWN | 1.5127581 | 1.5127581 | 0.5971813  | -0.8257096 | -1.422891  | n/a     | n/a                                                                                                                                           | NM_001206801 |
| uc058uon.1 | 9.24E-04 | DOWN | 1.3786023 | 1.3786023 | 0.4632063  | 0.87075204 | 0.4075457  | n/a     | n/a                                                                                                                                           | NM_001303097 |
| uc058upr.1 | 8.84E-04 | DOWN | 1.3141855 | 1.3141855 | 0.3941689  | -1.99234   | -2.386509  | n/a     | n/a                                                                                                                                           | NM_001304834 |
| uc059aun.1 | 6.11E-04 | DOWN | 1.5369658 | 1.5369658 | 0.6200851  | 0.47703028 | -0.1430549 | n/a     | n/a                                                                                                                                           | NR_104110    |
| uc059otm.1 | 6.89E-04 | DOWN | 2.245546  | 2.245546  | 1.1670663  | -0.8134839 | -1.9805502 | n/a     | n/a                                                                                                                                           | NR_033645    |
| uc060fvx.1 | 5.82E-04 | DOWN | 1.5452799 | 1.5452799 | 0.6278681  | -1.2433196 | -1.8711878 | n/a     | n/a                                                                                                                                           | NM_001304814 |
| uc060hxx.1 | 8.55E-04 | DOWN | 1.382876  | 1.382876  | 0.46767184 | 0.21683846 | -0.2508334 | n/a     | n/a                                                                                                                                           | NR_038416    |
| uc060myc.1 | 2.53E-04 | DOWN | 1.4927839 | 1.4927839 | 0.5780053  | -1.0690707 | -1.647076  | n/a     | n/a                                                                                                                                           | NM_001278684 |
| uc060nfo.1 | 7.90E-04 | DOWN | 1.5328991 | 1.5328991 | 0.6162628  | 1.4752246  | 0.8589618  | n/a     | n/a                                                                                                                                           | NM_001083625 |
| uc061irb.1 | 1.25E-05 | DOWN | 1.848503  | 1.848503  | 0.88635737 | -0.1049546 | -0.991312  | n/a     | n/a                                                                                                                                           | NR_073394    |
| uc061sne.1 | 9.73E-04 | DOWN | 2.2861962 | 2.2861962 | 1.1929492  | -1.8364338 | -3.029383  | n/a     | n/a                                                                                                                                           | NM_001079866 |
| uc061xwg.1 | 5.98E-04 | DOWN | 1.3093083 | 1.3093083 | 0.38880482 | -0.2577944 | -0.6465992 | n/a     | n/a                                                                                                                                           | NM_198433    |
| uc061xwh.1 | 2.95E-04 | DOWN | 1.3791691 | 1.3791691 | 0.46379936 | 0.08060125 | -0.3831982 | n/a     | n/a                                                                                                                                           | NM_198433    |
| uc061yty.1 | 3.04E-05 | DOWN | 1.5428617 | 1.5428617 | 0.62560874 | -1.9878901 | -2.613499  | n/a     | n/a                                                                                                                                           | NM_001283052 |
| uc062evq.1 | 2.26E-05 | DOWN | 1.2992173 | 1.2992173 | 0.37764278 | -0.3089729 | -0.6866157 | n/a     | n/a                                                                                                                                           | NR_104110    |
| uc062evt.1 | 1.31E-04 | DOWN | 1.3366652 | 1.3366652 | 0.4186381  | -0.4444166 | -0.8630547 | n/a     | n/a                                                                                                                                           | NR_104300    |
| uc062hvi.1 | 1.28E-04 | DOWN | 1.2769156 | 1.2769156 | 0.3526631  | 0.32500753 | -0.0276556 | n/a     | n/a                                                                                                                                           | NR_046352    |
| uc062jao.1 | 5.59E-04 | DOWN | 1.3062011 | 1.3062011 | 0.38537702 | -1.5060563 | -1.8914334 | n/a     | n/a                                                                                                                                           | NR_033815    |
| uc062jaq.1 | 8.53E-04 | DOWN | 1.245694  | 1.245694  | 0.31694975 | -0.8807747 | -1.1977245 | n/a     | n/a                                                                                                                                           | NR_033815    |
| uc062jar.1 | 9.22E-05 | DOWN | 1.3510718 | 1.3510718 | 0.43410438 | -1.4584565 | -1.892561  | n/a     | n/a                                                                                                                                           | NR_033815    |
| uc062lut.1 | 8.45E-04 | DOWN | 1.5484262 | 1.5484262 | 0.6308026  | -0.1032705 | -0.7340731 | n/a     | n/a                                                                                                                                           | NM_001261829 |
| uc062qnh.1 | 5.26E-04 | DOWN | 1.2573651 | 1.2573651 | 0.33040363 | -1.2823358 | -1.6127394 | n/a     | n/a                                                                                                                                           | NR_102639    |
| uc062xlo.1 | 8.12E-04 | DOWN | 1.3678064 | 1.3678064 | 0.45186406 | 1.3719277  | 0.9200637  | n/a     | n/a                                                                                                                                           | NR_103781    |
| uc062xlr.1 | 2.60E-04 | DOWN | 1.3787224 | 1.3787224 | 0.46333203 | 0.09416642 | -0.3691656 | n/a     | n/a                                                                                                                                           | NR_103782    |
| uc063exq.1 | 1.13E-04 | DOWN | 1.4738429 | 1.4738429 | 0.5595827  | 1.7643167  | 1.204734   | n/a     | n/a                                                                                                                                           | NM_001174071 |
| uc063ljh.1 | 1.93E-04 | DOWN | 1.6148275 | 1.6148275 | 0.6913801  | 0.365051   | -0.326329  | n/a     | n/a                                                                                                                                           | NM_001195286 |
| uc063msm.1 | 1.83E-04 | UP   | 1.290776  | -1.290776 | -0.3682387 | -0.5414801 | -0.1732414 | n/a     | n/a                                                                                                                                           | NR_072994    |
| uc063twf.1 | 1.83E-04 | UP   | 1.290776  | -1.290776 | -0.3682387 | -0.5414801 | -0.1732414 | n/a     | n/a                                                                                                                                           | NR_072994    |
| uc063vcd.1 | 1.83E-04 | UP   | 1.290776  | -1.290776 | -0.3682387 | -0.5414801 | -0.1732414 | n/a     | n/a                                                                                                                                           | NR_072994    |
| uc063whs.1 | 1.83E-04 | UP   | 1.290776  | -1.290776 | -0.3682387 | -0.5414801 | -0.1732414 | n/a     | n/a                                                                                                                                           | NR_072994    |
| uc063xhb.1 | 1.83E-04 | UP   | 1.290776  | -1.290776 | -0.3682387 | -0.5414801 | -0.1732414 | n/a     | n/a                                                                                                                                           | NR_072994    |
| uc063ymx.1 | 2.12E-04 | UP   | 1.296198  | -1.296198 | -0.3742861 | -0.6125109 | -0.2382247 | n/a     | n/a                                                                                                                                           | NR_072994    |
| uc063zss.1 | 1.83E-04 | UP   | 1.290776  | -1.290776 | -0.3682387 | -0.5414801 | -0.1732414 | n/a     | n/a                                                                                                                                           | NR_072994    |
| uc064dvi.1 | 9.93E-04 | DOWN | 2.9565728 | 2.9565728 | 1.5639257  | -2.0152664 | -3.5791922 | n/a     | n/a                                                                                                                                           | NR_047689    |
| uc064efz.1 | 4.38E-04 | DOWN | 1.5643185 | 1.5643185 | 0.6455343  | -0.9788129 | -1.6243472 | n/a     | n/a                                                                                                                                           | NR_045512    |
| uc064pgy.1 | 4.83E-04 | DOWN | 2.1829476 | 2.1829476 | 1.1262776  | -0.5619285 | -1.6882058 | n/a     | n/a                                                                                                                                           | NR_126339    |
| uc064rdj.1 | 3.14E-04 | DOWN | 2.5641959 | 2.5641959 | 1.3585064  | -3.039708  | -4.3982143 | n/a     | n/a                                                                                                                                           | NR_110193    |
| uc064voi.1 | 9.36E-04 | DOWN | 1.5573264 | 1.5573264 | 0.6390714  | -0.0684742 | -0.7075455 | n/a     | n/a                                                                                                                                           | NR_033234    |
| uc059bwu.1 | 8.27E-04 | DOWN | 1.4354949 | 1.4354949 | 0.5215482  | 1.0612817  | 0.5397335  | NAA30   | Homo sapiens N(alpha)-acetyltransferase 30, NatC catalytic subunit (NAA30), mRNA. (from RefSeq NM_001011713                                   |              |
| uc059qle.1 | 8.63E-04 | DOWN | 1.5101768 | 1.5101768 | 0.59471744 | -0.675169  | -1.2698864 | NAGPA   | Homo sapiens N-acetylglucosamine-1-phosphodiester alpha-N-acetylglucosaminidase (NAGPA), mRNA NM_016256                                       |              |
| uc064kqr.1 | 5.70E-04 | DOWN | 3.8234951 | 3.8234951 | 1.934892   | -1.4622906 | -3.3971827 | NAT1    | Homo sapiens N-acetyltransferase 1 (arylamine N-acetyltransferase) (NAT1), transcript variant 4, mRNA NM_001160173                            |              |
| uc057jyz.1 | 1.78E-04 | DOWN | 1.4817319 | 1.4817319 | 0.5672844  | 0.01036535 | -0.556919  | NBPF15  | Homo sapiens neuroblastoma breakpoint family, member 15 (NBPF15), transcript variant 2, mRNA. NM_173638                                       |              |
| uc057jza.1 | 7.35E-05 | DOWN | 1.5859307 | 1.5859307 | 0.66532975 | 0.4592986  | -0.2060311 | NBPF15  | Homo sapiens neuroblastoma breakpoint family, member 15 (NBPF15), transcript variant 2, mRNA. NM_173638                                       |              |
| uc062jqk.1 | 5.92E-04 | DOWN | 1.3335292 | 1.3335292 | 0.41524944 | -0.0118366 | -0.427086  | NCKIPSD | Homo sapiens NCK interacting protein with SH3 domain (NCKIPSD), transcript variant 2, mRNA. (from RefSeq NM_184231                            |              |
| uc064ipg.1 | 8.92E-04 | DOWN | 1.445949  | 1.445949  | 0.53201663 | 0.47285008 | -0.0591665 | NDUFB2  | Homo sapiens NADH dehydrogenase (ubiquinone) 1 beta subcomplex, 2, 8kDa (NDUFB2), mRNA. (from RefSeq NM_004546                                |              |
| uc057mpx.1 | 3.84E-04 | DOWN | 1.3569298 | 1.3569298 | 0.44034606 | -0.0668979 | -0.5072439 | NDUFS2  | Homo sapiens NADH dehydrogenase (ubiquinone) Fe-S protein 2, 49kDa (NADH-coenzyme Q reductase) (NDUFS2), mRNA. (from RefSeq NM_004550         |              |
| uc062yok.1 | 4.26E-04 | DOWN | 1.2873061 | 1.2873061 | 0.36435512 | 1.2260548  | 0.86169964 | NFKB1   | Homo sapiens nuclear factor of kappa light polypeptide gene enhancer in B-cells 1 (NFKB1), transcript variant 1, mRNA. (from RefSeq NM_003998 |              |
| uc061end.1 | 5.97E-05 | DOWN | 2.8327382 | 2.8327382 | 1.5021973  | -4.5717025 | -6.0738997 | NLRP2   | Homo sapiens NLR family, pyrin domain containing 2 (NLRP2), transcript variant 2, mRNA. (from RefSeq NM_001174081                             |              |
| uc061var.1 | 5.75E-05 | DOWN | 1.446402  | 1.446402  | 0.5324685  | 0.48531654 | -0.047152  | NOP56   | Homo sapiens NOP56 ribonucleoprotein (NOP56), transcript variant 1, mRNA. (from RefSeq NM_001006392                                           |              |
| uc032awd.2 | 7.10E-04 | DOWN | 1.2948493 | 1.2948493 | 0.37278417 | 1.1093647  | 0.7365806  | NOP9    | Homo sapiens NOP9 nucleolar protein (NOP9), transcript variant 2, mRNA. (from RefSeq NM_001286367                                             |              |

|            |          |      |           |           |            |            |            |          |                                                                                                                   |              |
|------------|----------|------|-----------|-----------|------------|------------|------------|----------|-------------------------------------------------------------------------------------------------------------------|--------------|
| uc021txo.2 | 1.75E-06 | DOWN | 1.6627548 | 1.6627548 | 0.7335754  | -1.3857993 | -2.1193748 | NT5C3B   | Homo sapiens 5'-nucleotidase, cytosolic IIIB (NT5C3B), transcript variant 1, mRNA. (from RefSeq NM_052935         |              |
| uc060fdr.1 | 1.71E-04 | DOWN | 1.4781127 | 1.4781127 | 0.5637563  | -1.2732315 | -1.8370777 | NT5C3B   | Homo sapiens 5'-nucleotidase, cytosolic IIIB (NT5C3B), transcript variant 1, mRNA. (from RefSeq NM_052935         |              |
| uc061aza.1 | 2.60E-04 | DOWN | 1.7418319 | 1.7418319 | 0.8006054  | 0.66143537 | -0.13917   | NTF4     | Homo sapiens neurotrophin 4 (NTF4), mRNA. (from RefSeq NM_006179)                                                 | NM_006179    |
| uc058qqv.1 | 5.41E-04 | DOWN | 1.4575303 | 1.4575303 | 0.5435258  | -0.3868452 | -0.930371  | NUP107   | Homo sapiens nucleoporin 107kDa (NUP107), mRNA. (from RefSeq NM_020401)                                           | NM_020401    |
| uc061bmx.1 | 1.57E-04 | DOWN | 1.4055872 | 1.4055872 | 0.49117294 | -0.087938  | -0.579111  | NUP62    | Homo sapiens nucleoporin 62kDa (NUP62), transcript variant 1, mRNA. (from RefSeq NM_153719)                       | NM_153719    |
| uc060jui.1 | 5.97E-04 | DOWN | 1.3628567 | 1.3628567 | 0.4466339  | -0.3735092 | -0.820143  | NUP85    | Homo sapiens nucleoporin 85kDa (NUP85), transcript variant 1, mRNA. (from RefSeq NM_024844)                       | NM_024844    |
| uc002gbo.3 | 3.72E-04 | DOWN | 1.237186  | 1.237186  | 0.30706236 | 0.6628111  | 0.3557488  | NUP88    | Homo sapiens nucleoporin 88kDa (NUP88), mRNA. (from RefSeq NM_002532)                                             | NM_002532    |
| uc057qeh.1 | 2.25E-04 | DOWN | 1.4150653 | 1.4150653 | 0.5008686  | -0.540885  | -1.0417535 | OBSCN    | Homo sapiens obscurin, cytoskeletal calmodulin and titin-interacting RhoGEF (OBSCN), transcript va                | NM_001271223 |
| uc011mbf.3 | 7.49E-04 | DOWN | 1.2250093 | 1.2250093 | 0.29279274 | -0.8481388 | -1.1409315 | ODF2     | Homo sapiens outer dense fiber of sperm tails 2 (ODF2), transcript variant 7, mRNA. (from RefSeq NM_153440        | NM_153440    |
| uc057fbq.1 | 8.30E-04 | DOWN | 1.3984331 | 1.3984331 | 0.48381123 | 0.2718339  | -0.2119774 | PABPC4   | Homo sapiens poly(A) binding protein, cytoplasmic 4 (inducible form) (PABPC4), transcript variant 3, NM_001135654 | NM_001135654 |
| uc003aks.4 | 7.61E-04 | DOWN | 1.2578754 | 1.2578754 | 0.33098906 | 0.7356434  | 0.40465438 | PATZ1    | Homo sapiens POZ (BTB) and AT hook containing zinc finger 1 (PATZ1), transcript variant 4, mRNA. NM_032051        | NM_032051    |
| uc010mls.3 | 5.64E-04 | DOWN | 1.4451263 | 1.4451263 | 0.5311956  | -1.0197122 | -1.5509171 | PAX5     | Homo sapiens paired box 5 (PAX5), transcript variant 5, mRNA. (from RefSeq NM_001280550)                          | NM_001280550 |
| uc064kpk.1 | 8.79E-04 | DOWN | 1.4384214 | 1.4384214 | 0.52448636 | 1.3690842  | 0.8445979  | PCM1     | Homo sapiens pericentriolar material 1 (PCM1), mRNA. (from RefSeq NM_006197)                                      | NM_006197    |
| uc062mbe.1 | 8.46E-04 | DOWN | 1.3801694 | 1.3801694 | 0.46484533 | 1.777595   | 1.3127497  | PCNP     | Homo sapiens PEST proteolytic signal containing nuclear protein (PCNP), mRNA. (from RefSeq NM_1020357             | NM_1020357   |
| uc060wvu.1 | 9.69E-04 | DOWN | 1.4061683 | 1.4061683 | 0.4917693  | -0.0943106 | -0.5860799 | PDCD2L   | Homo sapiens programmed cell death 2-like (PDCD2L), mRNA. (from RefSeq NM_032346)                                 | NM_032346    |
| uc001emh.3 | 6.42E-04 | DOWN | 1.2513936 | 1.2513936 | 0.32353556 | 0.80455637 | 0.48102078 | PDE4DIP  | Homo sapiens phosphodiesterase 4D interacting protein (PDE4DIP), transcript variant 5, mRNA. (fro                 | NM_001002811 |
| uc062alz.1 | 9.24E-04 | DOWN | 2.8799474 | 2.8799474 | 1.5260425  | -4.1637044 | -5.689747  | PDE9A    | Homo sapiens phosphodiesterase 9A (PDE9A), transcript variant 2, mRNA. (from RefSeq NM_00100                      | NM_001001567 |
| uc060baa.1 | 5.24E-04 | DOWN | 1.3054589 | 1.3054589 | 0.38455704 | -0.1416681 | -0.5262252 | PFAS     | Homo sapiens phosphoribosylformylglycinamide synthase (PFAS), mRNA. (from RefSeq NM_0123                          | NM_012393    |
| uc057jvt.1 | 1.61E-04 | DOWN | 1.6271101 | 1.6271101 | 0.7023119  | -0.5270156 | -1.2293276 | PHGDH    | Homo sapiens phosphoglycerate dehydrogenase (PHGDH), mRNA. (from RefSeq NM_006623)                                | NM_006623    |
| uc003try.3 | 4.05E-04 | DOWN | 1.296422  | 1.296422  | 0.3745354  | -0.0550644 | -0.4295999 | PHKG1    | Homo sapiens phosphorylase kinase, gamma 1 (muscle) (PHKG1), transcript variant 2, mRNA. (from                    | NM_006213    |
| uc021lyz.2 | 3.78E-04 | DOWN | 1.2906355 | 1.2906355 | 0.36808157 | 0.19874375 | -0.1693379 | PI16     | Homo sapiens peptidase inhibitor 16 (PI16), transcript variant 2, mRNA. (from RefSeq NM_0011991                   | NM_001199159 |
| uc057xni.1 | 5.85E-04 | DOWN | 3.3347383 | 3.3347383 | 1.7375735  | -1.7080282 | -3.4456017 | PIDD1    | Homo sapiens p53-induced death domain protein 1 (PIDD1), transcript variant 3, mRNA. (from RefS                   | NM_145887    |
| uc057xnk.1 | 8.87E-04 | DOWN | 1.6087366 | 1.6087366 | 0.68592817 | -0.6246703 | -1.3105985 | PIDD1    | Homo sapiens p53-induced death domain protein 1 (PIDD1), transcript variant 3, mRNA. (from RefS                   | NM_145887    |
| uc059php.1 | 3.39E-04 | DOWN | 1.2870557 | 1.2870557 | 0.36407453 | -0.428887  | -0.7929616 | PKD1     | Homo sapiens polycystic kidney disease 1 (autosomal dominant) (PKD1), transcript variant 2, mRNA                  | NM_000296    |
| uc059phr.1 | 3.64E-05 | DOWN | 1.7017137 | 1.7017137 | 0.76698834 | -0.359971  | -1.1269593 | PKD1     | Homo sapiens polycystic kidney disease 1 (autosomal dominant) (PKD1), transcript variant 2, mRNA                  | NM_000296    |
| uc059rhn.1 | 4.55E-04 | DOWN | 1.6877521 | 1.6877521 | 0.75510305 | 2.3829587  | 1.6278557  | PLA2G10  | Homo sapiens phospholipase A2, group X (PLA2G10), mRNA. (from RefSeq NM_003561),                                  | NM_003561    |
| uc009ypi.4 | 3.34E-04 | DOWN | 1.4851621 | 1.4851621 | 0.5706204  | 0.7913184  | 0.22069792 | PLCB3    | Homo sapiens phospholipase C, beta 3 (phosphatidylinositol-specific) (PLCB3), transcript variant 1, n             | NM_000932    |
| uc062iet.1 | 2.54E-04 | DOWN | 1.521547  | 1.521547  | 0.60553885 | -0.1730668 | -0.7786057 | PLCD1    | Homo sapiens phospholipase C, delta 1 (PLCD1), transcript variant 2, mRNA. (from RefSeq NM_006                    | NM_006225    |
| uc061xae.1 | 1.07E-04 | DOWN | 1.7400681 | 1.7400681 | 0.79914373 | 0.25267655 | -0.5464672 | PLCG1    | Homo sapiens phospholipase C, gamma 1 (PLCG1), transcript variant 2, mRNA. (from RefSeq NM_1                      | NM_182811    |
| uc059vsr.1 | 2.18E-04 | DOWN | 1.3588929 | 1.3588929 | 0.44243178 | -1.5788502 | -2.021282  | PLEKHG4  | Homo sapiens pleckstrin homology domain containing, family G (with RhoGef domain) member 4 (f                     | NM_001129729 |
| uc062erg.1 | 5.67E-04 | DOWN | 1.6051593 | 1.6051593 | 0.6827164  | -0.4386688 | -1.1213852 | PMM1     | Homo sapiens phosphomannomutase 1 (PMM1), mRNA. (from RefSeq NM_002676)                                           | NM_002676    |
| uc064bfu.1 | 7.43E-04 | DOWN | 1.297185  | 1.297185  | 0.37538418 | 0.449991   | 0.07460678 | PMS2     | Homo sapiens PMS2 postmeiotic segregation increased 2 (S. cerevisiae) (PMS2), transcript variant 1                | NM_000535    |
| uc062avx.1 | 5.29E-04 | DOWN | 1.4505265 | 1.4505265 | 0.5365766  | -1.348824  | -1.8854007 | POFUT2   | Homo sapiens protein O-fucosyltransferase 2 (POFUT2), transcript variant 3, mRNA. (from RefSeq                    | NM_133635    |
| uc062uom.1 | 3.79E-04 | DOWN | 2.7521698 | 2.7521698 | 1.4605695  | -1.5645882 | -3.0251577 | POLN     | Homo sapiens polymerase (DNA directed) nu (POLN), mRNA. (from RefSeq NM_181808)                                   | NM_181808    |
| uc057kca.1 | 7.84E-04 | DOWN | 1.3388258 | 1.3388258 | 0.42096826 | 1.2649206  | 0.84395236 | POLR3GL  | Homo sapiens polymerase (RNA) III (DNA directed) polypeptide G (32kD)-like (POLR3GL), mRNA. (fr                   | NM_032305    |
| uc003baf.5 | 7.24E-04 | DOWN | 1.1986835 | 1.1986835 | 0.26145077 | 0.3619145  | 0.10046375 | POLR3H   | Homo sapiens polymerase (RNA) III (DNA directed) polypeptide H (22.9kD) (POLR3H), transcript vari                 | NM_138338    |
| uc062eqw.1 | 3.06E-04 | DOWN | 1.3954544 | 1.3954544 | 0.48073497 | -0.283875  | -0.76461   | POLR3H   | Homo sapiens polymerase (RNA) III (DNA directed) polypeptide H (22.9kD) (POLR3H), transcript vari                 | NM_001018050 |
| uc064emi.1 | 2.27E-04 | DOWN | 1.4989387 | 1.4989387 | 0.58394134 | 1.5621787  | 0.97823733 | POM121C  | Homo sapiens POM121 transmembrane nucleoporin C (POM121C), mRNA. (from RefSeq NM_00105                            | NM_001099415 |
| uc061isf.1 | 5.45E-04 | DOWN | 1.2608339 | 1.2608339 | 0.33437818 | 0.6451784  | 0.31080022 | PPM1B    | Homo sapiens protein phosphatase, Mg2+/Mn2+ dependent, 1B (PPM1B), transcript variant 1, mRN                      | NM_002706    |
| uc058tfv.1 | 9.85E-04 | DOWN | 1.451177  | 1.451177  | 0.5372235  | 1.7413245  | 1.2041011  | PPP1CC   | Homo sapiens protein phosphatase 1, catalytic subunit, gamma isozyme (PPP1CC), transcript variant                 | NM_002710    |
| uc058enj.1 | 9.40E-04 | DOWN | 1.4143714 | 1.4143714 | 0.500161   | 0.5976357  | 0.09747469 | PPP6R3   | Homo sapiens protein phosphatase 6, regulatory subunit 3 (PPP6R3), transcript variant 3, mRNA. (fr                | NM_001164164 |
| uc058enm.1 | 9.88E-04 | DOWN | 1.4273974 | 1.4273974 | 0.513387   | 0.3181437  | -0.1952433 | PPP6R3   | Homo sapiens protein phosphatase 6, regulatory subunit 3 (PPP6R3), transcript variant 3, mRNA. (fr                | NM_001164164 |
| uc064yij.1 | 9.54E-04 | DOWN | 1.3761176 | 1.3761176 | 0.46060374 | 0.3719382  | -0.0886656 | PRDX4    | Homo sapiens peroxiredoxin 4 (PRDX4), mRNA. (from RefSeq NM_006406)                                               | NM_006406    |
| uc010smd.3 | 5.58E-04 | DOWN | 1.3640354 | 1.3640354 | 0.44788104 | 0.21469362 | -0.2331875 | PRKAG1   | Homo sapiens protein kinase, AMP-activated, gamma 1 non-catalytic subunit (PRKAG1), transcript v                  | NM_001206710 |
| uc010vlg.3 | 1.05E-04 | DOWN | 1.3053896 | 1.3053896 | 0.3844805  | -1.2878727 | -1.6723531 | PRMT7    | Homo sapiens protein arginine methyltransferase 7 (PRMT7), transcript variant 2, mRNA. (from Ref                  | NM_001184824 |
| uc059wfw.1 | 8.99E-04 | DOWN | 1.275288  | 1.275288  | 0.35082307 | -1.3989285 | -1.7497516 | PRMT7    | Homo sapiens protein arginine methyltransferase 7 (PRMT7), transcript variant 1, mRNA. (from Ref                  | NM_019023    |
| uc057knz.1 | 5.59E-04 | DOWN | 1.3038893 | 1.3038893 | 0.38282135 | 2.0640752  | 1.6812539  | PRPF3    | Homo sapiens pre-mRNA processing factor 3 (PRPF3), mRNA. (from RefSeq NM_004698)                                  | NM_004698    |
| uc059zhu.1 | 9.42E-04 | DOWN | 1.4483182 | 1.4483182 | 0.53437865 | 1.2172068  | 0.68282825 | PRPF8    | Homo sapiens pre-mRNA processing factor 8 (PRPF8), mRNA. (from RefSeq NM_006445),                                 | NM_006445    |
| uc064wqp.1 | 2.85E-04 | DOWN | 1.5161586 | 1.5161586 | 0.60042065 | 1.8911299  | 1.2907091  | PRRC2B   | Homo sapiens proline-rich coiled-coil 2B (PRRC2B), mRNA. (from RefSeq NM_013318)                                  | NM_013318    |
| uc060irr.1 | 4.01E-04 | DOWN | 1.2625949 | 1.2625949 | 0.33639187 | 0.5422088  | 0.20581692 | PSMCS    | Homo sapiens proteasome (prosome, macropain) 26S subunit, ATPase, 5 (PSMCS), transcript varian                    | NM_002805    |
| uc063mxz.1 | 7.17E-05 | DOWN | 4.6986156 | 4.6986156 | 2.2322357  | -1.4356651 | -3.6679008 | PSORS1C1 | Homo sapiens psoriasis susceptibility 1 candidate 1 (PSORS1C1), mRNA. (from RefSeq NM_014068)                     | NM_014068    |
| uc060qrc.1 | 2.06E-04 | DOWN | 1.292369  | 1.292369  | 0.37001806 | 0.46050623 | 0.09048816 | PTBP1    | Homo sapiens polypyrimidine tract binding protein 1 (PTBP1), transcript variant 2, mRNA. (from Ref                | NM_031990    |
| uc060qrh.1 | 2.20E-04 | DOWN | 1.3203248 | 1.3203248 | 0.40089285 | 0.04292854 | -0.3579643 | PTBP1    | Homo sapiens polypyrimidine tract binding protein 1 (PTBP1), transcript variant 1, mRNA. (from Ref                | NM_002819    |

|            |          |      |           |           |            |            |            |          |                                                                                                                                                             |              |
|------------|----------|------|-----------|-----------|------------|------------|------------|----------|-------------------------------------------------------------------------------------------------------------------------------------------------------------|--------------|
| uc064umt.1 | 8.19E-04 | DOWN | 2.0232575 | 2.0232575 | 1.0166799  | -2.7186441 | -3.7353241 | PTCH1    | Homo sapiens patched 1 (PTCH1), transcript variant 1d, mRNA. (from RefSeq NM_001083606)                                                                     | NM_001083606 |
| uc064unb.1 | 3.59E-04 | DOWN | 3.1931295 | 3.1931295 | 1.6749711  | -3.068345  | -4.743316  | PTCH1    | Homo sapiens patched 1 (PTCH1), transcript variant 1c', mRNA. (from RefSeq NM_001083605)                                                                    | NM_001083605 |
| uc057ofm.1 | 4.21E-04 | DOWN | 1.3871766 | 1.3871766 | 0.4721515  | -0.8639333 | -1.3360848 | PTPN7    | Homo sapiens protein tyrosine phosphatase, non-receptor type 7 (PTPN7), transcript variant 1, mRNA. (from RefSeq NM_002832)                                 | NM_002832    |
| uc058mvt.1 | 7.78E-05 | DOWN | 1.4958481 | 1.4958481 | 0.5809636  | -0.5292943 | -1.110258  | PUS7L    | Homo sapiens pseudouridylate synthase 7 homolog (S. cerevisiae)-like (PUS7L), transcript variant 2, NM_001098614                                            | NM_001098614 |
| uc062aqk.1 | 9.50E-04 | DOWN | 1.5196857 | 1.5196857 | 0.603773   | 1.3084248  | 0.70465183 | PWP2     | Homo sapiens PWP2 periodic tryptophan protein homolog (yeast) (PWP2), mRNA. (from RefSeq NM_005049)                                                         | NM_005049    |
| uc058fzr.1 | 7.95E-04 | DOWN | 1.594856  | 1.594856  | 0.67342615 | -1.209675  | -1.8831011 | RAB30    | Homo sapiens RAB30, member RAS oncogene family (RAB30), transcript variant 2, mRNA. (from RefSeq NM_014488)                                                 | NM_014488    |
| uc060uuc.1 | 3.13E-04 | DOWN | 1.4480727 | 1.4480727 | 0.534134   | 0.85487753 | 0.32074356 | RASAL3   | Homo sapiens RAS protein activator like 3 (RASAL3), mRNA. (from RefSeq NM_022904)                                                                           | NM_022904    |
| uc004dhf.4 | 5.01E-04 | DOWN | 1.2375112 | 1.2375112 | 0.30744153 | 1.3686744  | 1.0612328  | RBM10    | Homo sapiens RNA binding motif protein 10 (RBM10), transcript variant 1, mRNA. (from RefSeq NM_005676)                                                      | NM_005676    |
| uc004dhi.4 | 5.18E-04 | DOWN | 1.2458704 | 1.2458704 | 0.31715393 | 1.4672886  | 1.1501347  | RBM10    | Homo sapiens RNA binding motif protein 10 (RBM10), transcript variant 5, mRNA. (from RefSeq NM_001204468)                                                   | NM_001204468 |
| uc001tvm.5 | 3.05E-04 | DOWN | 1.2246418 | 1.2246418 | 0.29235983 | 0.42723038 | 0.149944   | RBM19    | Homo sapiens RNA binding motif protein 19 (RBM19), transcript variant 3, mRNA. (from RefSeq NM_001146698)                                                   | NM_001146698 |
| uc057kbj.1 | 2.70E-04 | DOWN | 1.3268416 | 1.3268416 | 0.40799615 | 1.4242088  | 1.0162126  | RBM8A    | Homo sapiens RNA binding motif protein 8A (RBM8A), mRNA. (from RefSeq NM_005105)                                                                            | NM_005105    |
| uc058acp.1 | 6.77E-04 | DOWN | 1.4084407 | 1.4084407 | 0.4940988  | -0.7304082 | -1.224507  | RCN1     | Homo sapiens reticulocalbin 1, EF-hand calcium binding domain (RCN1), mRNA. (from RefSeq NM_002901)                                                         | NM_002901    |
| uc062vzw.1 | 7.82E-04 | DOWN | 1.3807817 | 1.3807817 | 0.4654852  | 0.57894766 | 0.11346246 | RFC1     | Homo sapiens replication factor C (activator 1) 1, 145kDa (RFC1), transcript variant 1, mRNA. (from RefSeq NM_002913)                                       | NM_002913    |
| uc059xnc.1 | 2.30E-04 | DOWN | 1.5203614 | 1.5203614 | 0.60441434 | -0.0619525 | -0.6663668 | RFWD3    | Homo sapiens ring finger and WD repeat domain 3 (RFWD3), mRNA. (from RefSeq NM_018124)                                                                      | NM_018124    |
| uc032tgs.1 | 2.09E-04 | DOWN | 1.3263673 | 1.3263673 | 0.4074803  | -0.1065364 | -0.5140167 | RHOH     | Homo sapiens ras homolog family member H (RHOH), transcript variant 4, mRNA. (from RefSeq NM_001278362)                                                     | NM_001278362 |
| uc032tgt.1 | 2.67E-04 | DOWN | 1.315562  | 1.315562  | 0.39567924 | -0.0874111 | -0.4830904 | RHOH     | Homo sapiens ras homolog family member H (RHOH), transcript variant 1, mRNA. (from RefSeq NM_001278359)                                                     | NM_001278359 |
| uc032tgu.1 | 6.28E-04 | DOWN | 1.2880341 | 1.2880341 | 0.36517078 | -0.1437313 | -0.508902  | RHOH     | Homo sapiens ras homolog family member H (RHOH), transcript variant 3, mRNA. (from RefSeq NM_001278361)                                                     | NM_001278361 |
| uc032tgv.1 | 3.47E-04 | DOWN | 1.3125197 | 1.3125197 | 0.39233905 | -0.047764  | -0.440103  | RHOH     | Homo sapiens ras homolog family member H (RHOH), transcript variant 2, mRNA. (from RefSeq NM_001278360)                                                     | NM_001278360 |
| uc002jys.5 | 3.68E-04 | DOWN | 1.3271444 | 1.3271444 | 0.4083253  | 0.15025906 | -0.2580662 | RPTOR    | Homo sapiens regulatory associated protein of MTOR, complex 1 (RPTOR), transcript variant 2, mRNA. (from RefSeq NM_001163034)                               | NM_001163034 |
| uc010wuf.2 | 9.99E-04 | DOWN | 1.3079842 | 1.3079842 | 0.38734514 | 0.27418116 | -0.113164  | RPTOR    | Homo sapiens regulatory associated protein of MTOR, complex 1 (RPTOR), transcript variant 2, mRNA. (from RefSeq NM_001163034)                               | NM_001163034 |
| uc003znj.4 | 4.50E-04 | DOWN | 1.2600447 | 1.2600447 | 0.3334749  | 2.897482   | 2.564007   | RRAGA    | Homo sapiens Ras-related GTP binding A (RRAGA), mRNA. (from RefSeq NM_006570)                                                                               | NM_006570    |
| uc001mf.5  | 4.41E-04 | DOWN | 1.411432  | 1.411432  | 0.49715966 | 0.8156739  | 0.3185142  | RRAS2    | Homo sapiens related RAS viral (r-ras) oncogene homolog 2 (RRAS2), transcript variant 1, mRNA. (from RefSeq NM_012250)                                      | NM_012250    |
| uc060hiq.1 | 7.17E-04 | DOWN | 1.3859949 | 1.3859949 | 0.47092196 | 0.01118546 | -0.4597365 | RSAD1    | Homo sapiens radical S-adenosyl methionine domain containing 1 (RSAD1), transcript variant 1, mRNA. (from RefSeq NM_018346)                                 | NM_018346    |
| uc062oaq.1 | 1.48E-04 | DOWN | 1.4572004 | 1.4572004 | 0.5431993  | 0.11373038 | -0.4294689 | RYK      | Homo sapiens receptor-like tyrosine kinase (RYK), transcript variant 2, mRNA. (from RefSeq NM_002958)                                                       | NM_002958    |
| uc061akp.1 | 9.04E-04 | DOWN | 1.2700317 | 1.2700317 | 0.3448645  | 0.53511864 | 0.19025409 | SAE1     | Homo sapiens SUMO1 activating enzyme subunit 1 (SAE1), transcript variant 1, mRNA. (from RefSeq NM_005500)                                                  | NM_005500    |
| uc010swx.2 | 3.49E-04 | DOWN | 1.2962941 | 1.2962941 | 0.37439305 | 0.9367518  | 0.5623587  | SART3    | Homo sapiens squamous cell carcinoma antigen recognized by T cells 3 (SART3), mRNA. (from RefSeq NM_014706)                                                 | NM_014706    |
| uc058suo.1 | 4.11E-04 | DOWN | 1.2769626 | 1.2769626 | 0.3527163  | 0.61272655 | 0.2645602  | SART3    | Homo sapiens squamous cell carcinoma antigen recognized by T cells 3 (SART3), mRNA. (from RefSeq NM_014706)                                                 | NM_014706    |
| uc062xkn.1 | 9.64E-04 | DOWN | 1.4737791 | 1.4737791 | 0.5595203  | 1.5154352  | 0.9559149  | SDAD1    | Homo sapiens SDA1 domain containing 1 (SDAD1), transcript variant 1, mRNA. (from RefSeq NM_018115)                                                          | NM_018115    |
| uc059ahe.1 | 8.49E-04 | DOWN | 1.2069174 | 1.2069174 | 0.27132696 | -0.8409004 | -1.1122273 | SDR39U1  | Homo sapiens short chain dehydrogenase/reductase family 39U, member 1 (SDR39U1), transcript variant 1, mRNA. (from RefSeq NM_020195)                        | NM_020195    |
| uc062bvk.1 | 1.94E-04 | DOWN | 1.4599779 | 1.4599779 | 0.5459465  | -0.1899279 | -0.7358744 | SERPIND1 | Homo sapiens serpin peptidase inhibitor, clade D (heparin cofactor), member 1 (SERPIND1), mRNA. (from RefSeq NM_000185)                                     | NM_000185    |
| uc058fon.1 | 9.08E-04 | DOWN | 1.6135396 | 1.6135396 | 0.69022894 | -0.5334949 | -1.2237239 | SERPINH1 | Homo sapiens serpin peptidase inhibitor, clade H (heat shock protein 47), member 1, (collagen binding) (SERPINH1), mRNA. (from RefSeq NM_001207014)         | NM_001207014 |
| uc058zcs.1 | 7.69E-04 | DOWN | 1.4519949 | 1.4519949 | 0.53803635 | 0.74744505 | 0.20940872 | SF1      | Homo sapiens splicing factor 1 (SF1), transcript variant 5, mRNA. (from RefSeq NM_001178031)                                                                | NM_001178031 |
| uc003alf.5 | 2.22E-04 | DOWN | 1.2294629 | 1.2294629 | 0.29802814 | -0.3474678 | -0.645496  | SF11     | Homo sapiens Sfi1 homolog, spindle assembly associated (yeast) (SF11), transcript variant 2, mRNA. (from RefSeq NM_014775)                                  | NM_014775    |
| uc062djn.1 | 2.90E-04 | DOWN | 1.238267  | 1.238267  | 0.30832237 | -0.373285  | -0.6816074 | SF11     | Homo sapiens Sfi1 homolog, spindle assembly associated (yeast) (SF11), transcript variant 1, mRNA. (from RefSeq NM_001007467)                               | NM_001007467 |
| uc062djs.1 | 8.84E-05 | DOWN | 1.338568  | 1.338568  | 0.4206904  | -0.2944833 | -0.7151737 | SF11     | Homo sapiens Sfi1 homolog, spindle assembly associated (yeast) (SF11), transcript variant 2, mRNA. (from RefSeq NM_014775)                                  | NM_014775    |
| uc061kon.1 | 2.51E-04 | DOWN | 1.350485  | 1.350485  | 0.43347758 | -1.6922766 | -2.125754  | SFXN5    | Homo sapiens sideroflexin 5 (SFXN5), mRNA. (from RefSeq NM_144579)                                                                                          | NM_144579    |
| uc058hsd.1 | 9.84E-04 | DOWN | 1.4435725 | 1.4435725 | 0.5296436  | -0.0018167 | -0.5314603 | SIDT2    | Homo sapiens SID1 transmembrane family, member 2 (SIDT2), mRNA. (from RefSeq NM_00104045)                                                                   | NM_00104045  |
| uc059wbp.1 | 9.20E-04 | DOWN | 1.3850757 | 1.3850757 | 0.4699648  | -0.9814606 | -1.4514254 | SLC12A4  | Homo sapiens solute carrier family 12 (potassium/chloride transporter), member 4 (SLC12A4), transcript variant 1, mRNA. (from RefSeq NM_001145964)          | NM_001145964 |
| uc064wao.1 | 8.04E-05 | DOWN | 1.7162374 | 1.7162374 | 0.77924913 | -0.233956  | -1.0132052 | SLC25A25 | Homo sapiens solute carrier family 25 (mitochondrial carrier; phosphate carrier), member 25 (SLC25A25), transcript variant 1, mRNA. (from RefSeq NM_052901) | NM_052901    |
| uc002gku.1 | 6.72E-04 | DOWN | 1.2737942 | 1.2737942 | 0.34913218 | -0.1626447 | -0.5117768 | SLC25A35 | Homo sapiens solute carrier family 25, member 35 (SLC25A35), mRNA. (from RefSeq NM_201520)                                                                  | NM_201520    |
| uc003etr.3 | 9.13E-04 | DOWN | 1.2488834 | 1.2488834 | 0.32063875 | -0.4139556 | -0.7345943 | SLC25A36 | Homo sapiens solute carrier family 25 (pyrimidine nucleotide carrier), member 36 (SLC25A36), transcript variant 1, mRNA. (from RefSeq NM_001104647)         | NM_001104647 |
| uc062okh.1 | 5.48E-04 | DOWN | 1.5024016 | 1.5024016 | 0.5872705  | -0.638229  | -1.2254995 | SLC25A36 | Homo sapiens solute carrier family 25 (pyrimidine nucleotide carrier), member 36 (SLC25A36), transcript variant 2, mRNA. (from RefSeq NM_018155)            | NM_018155    |
| uc062kbt.1 | 4.06E-04 | DOWN | 3.7354627 | 3.7354627 | 1.9301287  | -1.2004913 | -3.1017783 | SLC38A3  | Homo sapiens solute carrier family 38, member 3 (SLC38A3), mRNA. (from RefSeq NM_006841)                                                                    | NM_006841    |
| uc002gur.3 | 2.37E-04 | DOWN | 1.2505794 | 1.2505794 | 0.3225966  | 0.63603765 | 0.313441   | SLC5A10  | Homo sapiens solute carrier family 5 (sodium/sugar cotransporter), member 10 (SLC5A10), transcript variant 1, mRNA. (from RefSeq NM_001282417)              | NM_001282417 |
| uc033eer.2 | 6.09E-04 | DOWN | 1.4189857 | 1.4189857 | 0.50486004 | 0.7264187  | 0.22155859 | SMC1A    | Homo sapiens structural maintenance of chromosomes 1A (SMC1A), transcript variant 1, mRNA. (from RefSeq NM_006306)                                          | NM_006306    |
| uc061ver.1 | 1.67E-04 | DOWN | 1.4434175 | 1.4434175 | 0.5294887  | 1.5320424  | 1.0025537  | SMOX     | Homo sapiens spermine oxidase (SMOX), transcript variant 2, mRNA. (from RefSeq NM_175840)                                                                   | NM_175840    |
| uc001sff.3 | 2.94E-04 | DOWN | 1.298578  | 1.298578  | 0.37693268 | -1.2101015 | -1.5870342 | SMUG1    | Homo sapiens single-strand-selective monofunctional uracil-DNA glycosylase 1 (SMUG1), transcript variant 1, mRNA. (from RefSeq NM_014311)                   | NM_014311    |
| uc058ouu.1 | 8.45E-04 | DOWN | 1.2666962 | 1.2666962 | 0.34107056 | -1.1676779 | -1.5087484 | SMUG1    | Homo sapiens single-strand-selective monofunctional uracil-DNA glycosylase 1 (SMUG1), transcript variant 2, mRNA. (from RefSeq NM_014311)                   | NM_014311    |
| uc064hsz.1 | 5.23E-04 | DOWN | 1.3600539 | 1.3600539 | 0.4436638  | 1.671265   | 1.2276012  | SND1     | Homo sapiens staphylococcal nuclease and tudor domain containing 1 (SND1), mRNA. (from RefSeq NM_014390)                                                    | NM_014390    |
| uc002dby.6 | 3.75E-04 | DOWN | 1.2043747 | 1.2043747 | 0.26828426 | 2.2939608  | 2.0256765  | SNX29    | Homo sapiens sorting nexin 29 (SNX29), mRNA. (from RefSeq NM_032167)                                                                                        | NM_032167    |
| uc064pbh.1 | 8.48E-04 | DOWN | 1.5363804 | 1.5363804 | 0.61953545 | -0.249683  | -0.8692184 | SNX31    | Homo sapiens sorting nexin 31 (SNX31), mRNA. (from RefSeq NM_152628)                                                                                        | NM_152628    |
| uc064kzy.1 | 9.63E-04 | DOWN | 1.5874264 | 1.5874264 | 0.6666897  | -0.9390299 | -1.6057196 | SORBS3   | Homo sapiens sorbin and SH3 domain containing 3 (SORBS3), transcript variant 1, mRNA. (from RefSeq NM_005775)                                               | NM_005775    |
| uc064szm.1 | 7.92E-04 | DOWN | 1.5565406 | 1.5565406 | 0.6383432  | -1.0379893 | -1.6763325 | SPAG8    | Homo sapiens sperm associated antigen 8 (SPAG8), transcript variant 1, mRNA. (from RefSeq NM_001039592)                                                     | NM_001039592 |

|            |          |      |           |           |            |            |            |           |                                                                                                                                                                         |              |
|------------|----------|------|-----------|-----------|------------|------------|------------|-----------|-------------------------------------------------------------------------------------------------------------------------------------------------------------------------|--------------|
| uc064tit.1 | 1.96E-04 | DOWN | 4.9173074 | 4.9173074 | 2.2978685  | -2.7281444 | -5.026013  | SPATA31A7 | Homo sapiens SPATA31 subfamily A, member 7 (SPATA31A7), mRNA. (from RefSeq NM_015667)                                                                                   | NM_015667    |
| uc001qrl.4 | 5.75E-04 | DOWN | 1.3101797 | 1.3101797 | 0.3897647  | 0.44171762 | 0.05195296 | SPSB2     | Homo sapiens spla/ryanodine receptor domain and SOCS box containing 2 (SPSB2), transcript variant 1 (SPSB2), transcript variant 1 (SPSB2), transcript variant 1 (SPSB2) | NM_001146316 |
| uc001qrm.4 | 3.64E-04 | DOWN | 1.3169955 | 1.3169955 | 0.3972504  | 0.4247893  | 0.0275389  | SPSB2     | Homo sapiens spla/ryanodine receptor domain and SOCS box containing 2 (SPSB2), transcript variant 1 (SPSB2), transcript variant 1 (SPSB2), transcript variant 1 (SPSB2) | NM_032641    |
| uc063eby.1 | 3.09E-04 | DOWN | 1.4520903 | 1.4520903 | 0.5381311  | 0.7738885  | 0.23575735 | SREK1     | Homo sapiens splicing regulatory glutamine/lysine-rich protein 1 (SREK1), transcript variant 4, mRNA. (from RefSeq NM_001270493)                                        | NM_001270493 |
| uc059cww.1 | 4.53E-04 | DOWN | 1.6296676 | 1.6296676 | 0.70457774 | 1.7157656  | 1.0111878  | SRSF5     | Homo sapiens serine/arginine-rich splicing factor 5 (SRSF5), transcript variant 2, mRNA. (from RefSeq NM_006925)                                                        | NM_006925    |
| uc002kvn.4 | 8.22E-04 | DOWN | 1.3419981 | 1.3419981 | 0.42438263 | 0.2535786  | -0.1708041 | SS18      | Homo sapiens synovial sarcoma translocation, chromosome 18 (SS18), transcript variant 2, mRNA. (from RefSeq NM_005637)                                                  | NM_005637    |
| uc058mcg.1 | 5.83E-04 | DOWN | 2.3022642 | 2.3022642 | 1.2030534  | -0.5542331 | -1.7572865 | SSPN      | Homo sapiens sarcospan (SSPN), transcript variant 2, mRNA. (from RefSeq NM_001135823)                                                                                   | NM_001135823 |
| uc064qlp.1 | 7.84E-04 | DOWN | 1.3147906 | 1.3147906 | 0.39483306 | 1.9079814  | 1.5131483  | ST3GAL1   | Homo sapiens ST3 beta-galactoside alpha-2,3-sialyltransferase 1 (ST3GAL1), transcript variant 2, mRNA. (from RefSeq NM_173344)                                          | NM_173344    |
| uc010rmb.2 | 2.05E-04 | DOWN | 1.3715278 | 1.3715278 | 0.45578384 | 1.8385347  | 1.3827509  | STIP1     | Homo sapiens stress-induced phosphoprotein 1 (STIP1), transcript variant 3, mRNA. (from RefSeq NM_001282653)                                                            | NM_001282653 |
| uc003nyo.4 | 5.77E-04 | DOWN | 2.892846  | 2.892846  | 1.5324895  | -3.682356  | -5.2148457 | STK19     | Homo sapiens serine/threonine kinase 19 (STK19), transcript variant 3, non-coding RNA. (from RefSeq NR_026717)                                                          | NM_026717    |
| uc061uro.1 | 4.79E-04 | DOWN | 1.4358821 | 1.4358821 | 0.52193725 | -0.4958884 | -1.0178257 | STK25     | Homo sapiens serine/threonine kinase 25 (STK25), transcript variant 4, mRNA. (from RefSeq NM_001066374)                                                                 | NM_001066374 |
| uc057jcy.1 | 1.87E-04 | DOWN | 1.4310664 | 1.4310664 | 0.5170906  | 0.70703584 | 0.18994522 | STRIP1    | Homo sapiens striatin interacting protein 1 (STRIP1), transcript variant 2, mRNA. (from RefSeq NM_001270768)                                                            | NM_001270768 |
| uc060vzi.1 | 4.07E-04 | DOWN | 1.3941176 | 1.3941176 | 0.47935227 | -0.6710272 | -1.1503794 | SUGP1     | Homo sapiens SURP and G patch domain containing 1 (SUGP1), mRNA. (from RefSeq NM_172231)                                                                                | NM_172231    |
| uc060vzm.1 | 3.18E-04 | DOWN | 1.4322947 | 1.4322947 | 0.51832837 | -0.7515937 | -1.269922  | SUGP1     | Homo sapiens SURP and G patch domain containing 1 (SUGP1), mRNA. (from RefSeq NM_172231)                                                                                | NM_172231    |
| uc057yyi.1 | 3.18E-04 | DOWN | 1.4614923 | 1.4614923 | 0.5474422  | 0.6499431  | 0.10250086 | SWAP70    | Homo sapiens SWAP switching B-cell complex 70kDa subunit (SWAP70), transcript variant 1, mRNA. (from RefSeq NM_015055)                                                  | NM_015055    |
| uc059cwr.1 | 2.10E-04 | DOWN | 1.4609756 | 1.4609756 | 0.5469321  | 0.7396915  | 0.19275932 | SYNJ2BP   | Homo sapiens synaptojanin 2 binding protein (SYNJ2BP), mRNA. (from RefSeq NM_018373)                                                                                    | NM_018373    |
| uc002kvt.5 | 3.64E-04 | DOWN | 1.2995728 | 1.2995728 | 0.37803748 | -0.21532   | -0.5933575 | TAF4B     | Homo sapiens TAF4b RNA polymerase II, TATA box binding protein (TBP)-associated factor, 105kDa (TAF4B), transcript variant 5, mRNA. (from RefSeq NM_001293725)          | NM_001293725 |
| uc062vjo.1 | 5.50E-04 | DOWN | 1.3021791 | 1.3021791 | 0.3809279  | 0.78185314 | 0.40092528 | TAPT1     | Homo sapiens transmembrane anterior posterior transformation 1 (TAPT1), mRNA. (from RefSeq NM_153365)                                                                   | NM_153365    |
| uc062dbn.1 | 5.92E-04 | DOWN | 1.47967   | 1.47967   | 0.5652755  | 0.32357368 | -0.2417019 | TBC1D10A  | Homo sapiens TBC1 domain family, member 10A (TBC1D10A), transcript variant 2, mRNA. (from RefSeq NM_031937)                                                             | NM_031937    |
| uc059pdz.1 | 6.61E-04 | DOWN | 1.3326174 | 1.3326174 | 0.41426262 | -0.5980837 | -1.0123463 | TBL3      | Homo sapiens transducin (beta)-like 3 (TBL3), mRNA. (from RefSeq NM_006453)                                                                                             | NM_006453    |
| uc060rek.1 | 1.03E-04 | DOWN | 1.3305947 | 1.3305947 | 0.41207114 | 0.13917707 | -0.2728941 | TCF3      | Homo sapiens transcription factor 3 (TCF3), transcript variant 1, mRNA. (from RefSeq NM_003200)                                                                         | NM_003200    |
| uc061znt.1 | 7.03E-04 | DOWN | 1.4835258 | 1.4835258 | 0.56903    | -1.0095584 | -1.5785884 | TCP10L    | Homo sapiens t-complex 10-like (TCP10L), mRNA. (from RefSeq NM_144659)                                                                                                  | NM_144659    |
| uc009wnb.2 | 4.04E-04 | DOWN | 1.2925551 | 1.2925551 | 0.37022576 | -1.1198666 | -1.4900924 | TDRKH     | Homo sapiens tudor and KH domain containing (TDRKH), transcript variant 3, mRNA. (from RefSeq NM_0006862)                                                               | NM_0006862   |
| uc057kyy.1 | 1.87E-04 | DOWN | 1.2944707 | 1.2944707 | 0.37236226 | -1.8051876 | -2.1775498 | TDRKH     | Homo sapiens tudor and KH domain containing (TDRKH), transcript variant 2, mRNA. (from RefSeq NM_001083963)                                                             | NM_001083963 |
| uc060upn.1 | 1.44E-04 | DOWN | 1.7235485 | 1.7235485 | 0.7853819  | -0.249048  | -1.0344299 | TECR      | Homo sapiens trans-2,3-enoyl-CoA reductase (TECR), transcript variant 1, mRNA. (from RefSeq NM_138501)                                                                  | NM_138501    |
| uc057lnm.1 | 7.68E-04 | DOWN | 2.6156912 | 2.6156912 | 1.3871922  | -0.9821219 | -2.3693142 | THBS3     | Homo sapiens thrombospondin 3 (THBS3), transcript variant 3, mRNA. (from RefSeq NM_00125260)                                                                            | NM_00125260  |
| uc061kij.1 | 1.82E-04 | DOWN | 1.5086564 | 1.5086564 | 0.5932642  | 0.92305785 | 0.3297936  | TIA1      | Homo sapiens TIA1 cytotoxic granule-associated RNA binding protein (TIA1), transcript variant 2, mRNA. (from RefSeq NM_022173)                                          | NM_022173    |
| uc060vxx.1 | 9.17E-06 | DOWN | 6.3920336 | 6.3920336 | 2.676275   | -0.8566036 | -3.5328786 | TMEM161A  | Homo sapiens transmembrane protein 161A (TMEM161A), transcript variant 2, mRNA. (from RefSeq NM_001256766)                                                              | NM_001256766 |
| uc002ocx.3 | 7.29E-04 | DOWN | 1.3421794 | 1.3421794 | 0.42457753 | 1.0684067  | 0.64382917 | TMEM186   | Homo sapiens transmembrane protein 186 (TMEM186), mRNA. (from RefSeq NM_015421)                                                                                         | NM_015421    |
| uc058qzc.1 | 4.84E-04 | DOWN | 1.4507658 | 1.4507658 | 0.5368147  | 0.22629212 | -0.3105226 | TMEM19    | Homo sapiens transmembrane protein 19 (TMEM19), mRNA. (from RefSeq NM_018279)                                                                                           | NM_018279    |
| uc062bjc.1 | 9.17E-04 | DOWN | 3.3256276 | 3.3256276 | 1.7336266  | -2.2503574 | -3.983984  | TMEM191B  | Homo sapiens transmembrane protein 191B (TMEM191B), mRNA. (from RefSeq NM_001242313)                                                                                    | NM_001242313 |
| uc058ssh.1 | 3.91E-06 | DOWN | 1.5409752 | 1.5409752 | 0.62384367 | 0.46464792 | -0.1591958 | TMEM263   | Homo sapiens transmembrane protein 263 (TMEM263), mRNA. (from RefSeq NM_152261)                                                                                         | NM_152261    |
| uc057pch.1 | 8.78E-04 | DOWN | 1.4623923 | 1.4623923 | 0.5483304  | 1.9409966  | 1.3926662  | TRAF3IP3  | Homo sapiens TRAF3 interacting protein 3 (TRAF3IP3), transcript variant 2, mRNA. (from RefSeq NM_001287754)                                                             | NM_001287754 |
| uc060dem.1 | 9.16E-04 | DOWN | 1.3961633 | 1.3961633 | 0.48146772 | -0.4331847 | -0.9146524 | TRAF4     | Homo sapiens TNF receptor-associated factor 4 (TRAF4), mRNA. (from RefSeq NM_004295)                                                                                    | NM_004295    |
| uc011ekt.3 | 6.76E-04 | DOWN | 1.8590623 | 1.8590623 | 0.8945751  | -5.1601963 | -6.0547714 | TRIM26    | Homo sapiens tripartite motif containing 26 (TRIM26), transcript variant 1, mRNA. (from RefSeq NM_003449)                                                               | NM_003449    |
| uc011exk.3 | 7.58E-04 | DOWN | 1.5816913 | 1.5816913 | 0.661468   | -4.2868767 | -4.9483447 | TRIM26    | Homo sapiens tripartite motif containing 26 (TRIM26), transcript variant 1, mRNA. (from RefSeq NM_003449)                                                               | NM_003449    |
| uc011fvx.3 | 6.76E-04 | DOWN | 1.8590623 | 1.8590623 | 0.8945751  | -5.1601963 | -6.0547714 | TRIM26    | Homo sapiens tripartite motif containing 26 (TRIM26), transcript variant 1, mRNA. (from RefSeq NM_003449)                                                               | NM_003449    |
| uc011ihz.3 | 6.76E-04 | DOWN | 1.8590623 | 1.8590623 | 0.8945751  | -5.1601963 | -6.0547714 | TRIM26    | Homo sapiens tripartite motif containing 26 (TRIM26), transcript variant 1, mRNA. (from RefSeq NM_003449)                                                               | NM_003449    |
| uc061dud.1 | 5.87E-04 | DOWN | 1.3993151 | 1.3993151 | 0.4847209  | 1.599368   | 1.114647   | TRIM28    | Homo sapiens tripartite motif containing 28 (TRIM28), mRNA. (from RefSeq NM_005762)                                                                                     | NM_005762    |
| uc061dud.1 | 1.33E-04 | DOWN | 1.4319136 | 1.4319136 | 0.51794446 | 1.4607326  | 0.9427881  | TRIM28    | Homo sapiens tripartite motif containing 28 (TRIM28), mRNA. (from RefSeq NM_005762)                                                                                     | NM_005762    |
| uc059pfx.1 | 4.33E-04 | DOWN | 1.3908731 | 1.3908731 | 0.47599077 | -0.7714217 | -1.2474126 | TSC2      | Homo sapiens tuberous sclerosis 2 (TSC2), transcript variant 4, mRNA. (from RefSeq NM_00107718)                                                                         | NM_00107718  |
| uc058qdh.1 | 3.68E-04 | DOWN | 1.457643  | 1.457643  | 0.54363745 | -0.9739726 | -1.5176101 | TSFM      | Homo sapiens Ts translation elongation factor, mitochondrial (TSFM), transcript variant 2, mRNA. (from RefSeq NM_005726)                                                | NM_005726    |
| uc064ebm.1 | 2.61E-04 | DOWN | 1.3691713 | 1.3691713 | 0.45330292 | -0.3239483 | -0.772512  | TYW1      | Homo sapiens tRNA-yW synthesizing protein 1 homolog (S. cerevisiae) (TYW1), mRNA. (from RefSeq NM_018264)                                                               | NM_018264    |
| uc010gpe.4 | 6.41E-04 | DOWN | 1.2603626 | 1.2603626 | 0.33383888 | 0.6372262  | 0.3033874  | UBASH3A   | Homo sapiens ubiquitin associated and SH3 domain containing A (UBASH3A), transcript variant 3, mRNA. (from RefSeq NM_001243467)                                         | NM_001243467 |
| uc062atf.1 | 1.78E-04 | DOWN | 1.3657991 | 1.3657991 | 0.44974524 | 0.73383886 | 0.28409365 | UBE2G2    | Homo sapiens ubiquitin-conjugating enzyme E2G 2 (UBE2G2), transcript variant 1, mRNA. (from RefSeq NM_003343)                                                           | NM_003343    |
| uc060kwg.1 | 2.83E-04 | DOWN | 1.2708144 | 1.2708144 | 0.34575337 | -0.2679234 | -0.6136767 | USP36     | Homo sapiens ubiquitin specific peptidase 36 (USP36), mRNA. (from RefSeq NM_025090)                                                                                     | NM_025090    |
| uc061lir.1 | 8.90E-04 | DOWN | 1.2361414 | 1.2361414 | 0.30584383 | 0.01851674 | -0.287327  | USP39     | Homo sapiens ubiquitin specific peptidase 39 (USP39), transcript variant 2, mRNA. (from RefSeq NM_001256725)                                                            | NM_001256725 |
| uc001xss.4 | 4.40E-04 | DOWN | 1.3755202 | 1.3755202 | 0.45997736 | 0.10258385 | -0.3573935 | VASH1     | Homo sapiens vasohibin 1 (VASH1), mRNA. (from RefSeq NM_014909)                                                                                                         | NM_014909    |
| uc001ucd.4 | 8.90E-04 | DOWN | 1.2559216 | 1.2559216 | 0.3287464  | 2.1484215  | 1.8196751  | VPS33A    | Homo sapiens vacuolar protein sorting 33 homolog A (S. cerevisiae) (VPS33A), mRNA. (from RefSeq NM_002916)                                                              | NM_002916    |
| uc058deo.1 | 8.74E-04 | DOWN | 1.3332107 | 1.3332107 | 0.4149048  | 1.3796762  | 0.96477145 | VPS51     | Homo sapiens vacuolar protein sorting 51 homolog (S. cerevisiae) (VPS51), transcript variant 1, mRNA. (from RefSeq NM_013265)                                           | NM_013265    |
| uc058dep.1 | 1.26E-04 | DOWN | 1.4589694 | 1.4589694 | 0.5449496  | 1.801518   | 1.2565684  | VPS51     | Homo sapiens vacuolar protein sorting 51 homolog (S. cerevisiae) (VPS51), transcript variant 1, mRNA. (from RefSeq NM_013265)                                           | NM_013265    |
| uc058des.1 | 3.86E-04 | DOWN | 1.4673897 | 1.4673897 | 0.55325204 | 2.1826818  | 1.6294297  | VPS51     | Homo sapiens vacuolar protein sorting 51 homolog (S. cerevisiae) (VPS51), transcript variant 1, mRNA. (from RefSeq NM_013265)                                           | NM_013265    |
| uc057ixb.1 | 3.09E-04 | DOWN | 1.4779993 | 1.4779993 | 0.5636456  | 0.5589262  | -0.0047194 | WDR47     | Homo sapiens WD repeat domain 47 (WDR47), transcript variant 3, mRNA. (from RefSeq NM_001142551)                                                                        | NM_001142551 |

|            |          |      |           |           |            |            |            |         |                                                                                                                          |              |
|------------|----------|------|-----------|-----------|------------|------------|------------|---------|--------------------------------------------------------------------------------------------------------------------------|--------------|
| uc060plz.1 | 8.10E-04 | DOWN | 1.4390806 | 1.4390806 | 0.5251474  | 0.4197742  | -0.1053732 | WDR7    | Homo sapiens WD repeat domain 7 (WDR7), transcript variant 2, mRNA. (from RefSeq NM_052834)                              | NM_052834    |
| uc062unn.1 | 5.56E-04 | DOWN | 2.5743792 | 2.5743792 | 1.3642246  | -1.6938831 | -3.0581076 | WHSC1   | Homo sapiens Wolf-Hirschhorn syndrome candidate 1 (WHSC1), transcript variant 3, mRNA. (from RNM_133335)                 | NM_133335    |
| uc059qwg.1 | 7.51E-04 | DOWN | 1.4578638 | 1.4578638 | 0.54385597 | 0.18383855 | -0.3600174 | ZC3H7A  | Homo sapiens zinc finger CCHC-type containing 7A (ZC3H7A), mRNA. (from RefSeq NM_014153)                                 | NM_014153    |
| uc060pua.1 | 2.15E-04 | DOWN | 1.431236  | 1.431236  | 0.5172616  | 1.455643   | 0.93838143 | ZCCHC2  | Homo sapiens zinc finger, CCHC domain containing 2 (ZCCHC2), transcript variant 1, mRNA. (from RefSeq NM_017742)         | NM_017742    |
| uc001knl.5 | 1.98E-04 | DOWN | 1.2404679 | 1.2404679 | 0.31088442 | -1.4266387 | -1.7375231 | ZDHHC16 | Homo sapiens zinc finger, DHHC-type containing 16 (ZDHHC16), transcript variant 2, mRNA. (from RefSeq NM_198043)         | NM_198043    |
| uc001knn.5 | 2.20E-04 | DOWN | 1.2567183 | 1.2567183 | 0.32966128 | -1.4043833 | -1.7340446 | ZDHHC16 | Homo sapiens zinc finger, DHHC-type containing 16 (ZDHHC16), transcript variant 4, mRNA. (from RefSeq NM_198045)         | NM_198045    |
| uc001knn.5 | 2.96E-04 | DOWN | 1.2478478 | 1.2478478 | 0.31944197 | -1.4134797 | -1.7329217 | ZDHHC16 | Homo sapiens zinc finger, DHHC-type containing 16 (ZDHHC16), transcript variant 3, mRNA. (from RefSeq NM_198044)         | NM_198044    |
| uc057vfd.1 | 6.44E-05 | DOWN | 1.6282582 | 1.6282582 | 0.7033295  | -0.3471101 | -1.0504397 | ZDHHC16 | Homo sapiens zinc finger, DHHC-type containing 16 (ZDHHC16), transcript variant 7, mRNA. (from RefSeq NM_001287804)      | NM_001287804 |
| uc059ygx.1 | 3.41E-04 | DOWN | 1.5172886 | 1.5172886 | 0.6014955  | -0.2331409 | -0.8346365 | ZFPM1   | Homo sapiens zinc finger protein, FOG family member 1 (ZFPM1), mRNA. (from RefSeq NM_15381)                              | NM_15381     |
| uc010qpb.3 | 7.77E-04 | DOWN | 1.2197018 | 1.2197018 | 0.28652844 | -0.3717222 | -0.6582506 | ZFYVE27 | Homo sapiens zinc finger, FYVE domain containing 27 (ZFYVE27), transcript variant 6, mRNA. (from RefSeq NM_001174121)    | NM_001174121 |
| uc061you.1 | 3.34E-05 | DOWN | 1.538955  | 1.538955  | 0.621951   | -0.3797532 | -1.0017042 | ZGPAT   | Homo sapiens zinc finger, CCCH-type with G patch domain (ZGPAT), transcript variant 3, mRNA. (from RefSeq NM_181485)     | NM_181485    |
| uc004aum.2 | 2.64E-04 | DOWN | 1.3094375 | 1.3094375 | 0.38894722 | -0.0145963 | -0.4035435 | ZNF169  | Homo sapiens zinc finger protein 169 (ZNF169), transcript variant 2, mRNA. (from RefSeq NM_1943)                         | NM_1943      |
| uc010tbw.3 | 2.49E-04 | DOWN | 1.4636956 | 1.4636956 | 0.54961556 | -2.0871649 | -2.6367805 | ZNF268  | Homo sapiens zinc finger protein 268 (ZNF268), transcript variant 5, mRNA. (from RefSeq NM_0011)                         | NM_0011      |
| uc064fyo.1 | 6.80E-04 | DOWN | 1.4893813 | 1.4893813 | 0.5747132  | -1.0091217 | -1.5838348 | ZNF3    | Homo sapiens zinc finger protein 3 (ZNF3), transcript variant 1, mRNA. (from RefSeq NM_017715)                           | NM_017715    |
| uc002nvr.3 | 9.95E-04 | DOWN | 1.2547241 | 1.2547241 | 0.32737023 | -0.7882028 | -1.1155729 | ZNF302  | Homo sapiens zinc finger protein 302 (ZNF302), transcript variant 3, mRNA. (from RefSeq NM_0012)                         | NM_0012      |
| uc060xsx.1 | 3.28E-04 | DOWN | 1.3566679 | 1.3566679 | 0.44006756 | -0.0882812 | -0.5283487 | ZNF383  | Homo sapiens zinc finger protein 383 (ZNF383), mRNA. (from RefSeq NM_152604)                                             | NM_152604    |
| uc001ico.4 | 1.86E-04 | DOWN | 1.2566826 | 1.2566826 | 0.32962036 | -0.2125391 | -0.5421595 | ZNF496  | Homo sapiens zinc finger protein 496 (ZNF496), mRNA. (from RefSeq NM_032752)                                             | NM_032752    |
| uc002mtq.3 | 1.41E-04 | DOWN | 1.4632297 | 1.4632297 | 0.5491562  | -0.7157932 | -1.2649494 | ZNF563  | Homo sapiens zinc finger protein 563 (ZNF563), mRNA. (from RefSeq NM_145276)                                             | NM_145276    |
| uc060zmo.1 | 9.09E-05 | DOWN | 1.7175585 | 1.7175585 | 0.7803592  | 0.4081181  | -0.3722412 | ZNF576  | Homo sapiens zinc finger protein 576 (ZNF576), transcript variant 2, mRNA. (from RefSeq NM_0011)                         | NM_0011      |
| uc061dnb.1 | 5.18E-04 | DOWN | 1.5809321 | 1.5809321 | 0.6607754  | 0.41471407 | -0.2460613 | ZNF586  | Homo sapiens zinc finger protein 586 (ZNF586), transcript variant 2, mRNA. (from RefSeq NM_001)                          | NM_001       |
| uc061dnf.1 | 9.71E-04 | DOWN | 1.51933   | 1.51933   | 0.6034353  | -0.3240847 | -0.92752   | ZNF587  | Homo sapiens zinc finger protein 587 (ZNF587), transcript variant 1, mRNA. (from RefSeq NM_0328)                         | NM_0328      |
| uc061dng.1 | 9.64E-04 | DOWN | 1.7451968 | 1.7451968 | 0.8033897  | -0.2446956 | -1.0480853 | ZNF587  | Homo sapiens zinc finger protein 587 (ZNF587), transcript variant 2, mRNA. (from RefSeq NM_0012)                         | NM_0012      |
| uc061dnh.1 | 5.39E-04 | DOWN | 1.4637096 | 1.4637096 | 0.54962933 | -0.3309494 | -0.8805787 | ZNF587  | Homo sapiens zinc finger protein 587 (ZNF587), transcript variant 2, mRNA. (from RefSeq NM_0012)                         | NM_0012      |
| uc061dni.1 | 4.60E-04 | DOWN | 1.4697145 | 1.4697145 | 0.555536   | -0.5591287 | -1.1146647 | ZNF587  | Homo sapiens zinc finger protein 587 (ZNF587), transcript variant 2, mRNA. (from RefSeq NM_0012)                         | NM_0012      |
| uc060weu.1 | 2.74E-04 | DOWN | 1.75261   | 1.75261   | 0.809505   | 0.68229747 | -0.1272075 | ZNF626  | Homo sapiens zinc finger protein 626 (ZNF626), transcript variant 2, mRNA. (from RefSeq NM_1452)                         | NM_1452      |
| uc059tkg.1 | 7.93E-04 | DOWN | 2.61518   | 2.61518   | 1.3869102  | -1.3806344 | -2.7675447 | ZNF668  | Homo sapiens zinc finger protein 668 (ZNF668), transcript variant 2, mRNA. (from RefSeq NM_0247)                         | NM_0247      |
| uc057fla.1 | 5.33E-04 | DOWN | 1.3146166 | 1.3146166 | 0.39464206 | -1.5912694 | -1.9859115 | ZNF691  | Homo sapiens zinc finger protein 691 (ZNF691), transcript variant 1, mRNA. (from RefSeq NM_0012)                         | NM_0012      |
| uc011kuo.3 | 5.63E-04 | DOWN | 1.1895795 | 1.1895795 | 0.25045168 | 1.8345261  | 1.5840744  | ZNF783  | Homo sapiens zinc finger family member 783 (ZNF783), mRNA. (from RefSeq NM_001195220)                                    | NM_001195220 |
| uc060tys.1 | 8.33E-04 | DOWN | 1.734782  | 1.734782  | 0.7947543  | 0.78073627 | -0.0140181 | ZNF799  | Homo sapiens zinc finger protein 799 (ZNF799), mRNA. (from RefSeq NM_001080821)                                          | NM_001080821 |
| uc010ygn.3 | 5.09E-04 | DOWN | 1.2656769 | 1.2656769 | 0.3399091  | 1.6741399  | 1.3342308  | ZNF835  | Homo sapiens zinc finger protein 835 (ZNF835), mRNA. (from RefSeq NM_001005850)                                          | NM_001005850 |
| uc061cbj.1 | 3.95E-04 | DOWN | 1.4309256 | 1.4309256 | 0.51694864 | 0.8439073  | 0.32695857 | ZNF841  | Homo sapiens zinc finger protein 841 (ZNF841), mRNA. (from RefSeq NM_001136499)                                          | NM_001136499 |
| uc062iuy.1 | 4.36E-04 | DOWN | 1.3225425 | 1.3225425 | 0.40331414 | -0.3897847 | -0.7930989 | ZNF852  | Homo sapiens zinc finger protein 852 (ZNF852), mRNA. (from RefSeq NM_001287349)                                          | NM_001287349 |
| uc062iuz.1 | 2.11E-05 | DOWN | 1.3880543 | 1.3880543 | 0.47306395 | -0.2150409 | -0.6881048 | ZNF852  | Homo sapiens zinc finger protein 852 (ZNF852), mRNA. (from RefSeq NM_001287349)                                          | NM_001287349 |
| uc002bkr.4 | 3.45E-05 | DOWN | 1.346895  | 1.346895  | 0.42963737 | -1.5751795 | -2.0048168 | ZSCAN2  | Homo sapiens zinc finger and SCAN domain containing 2 (ZSCAN2), transcript variant 1, mRNA. (from RefSeq NM_181877)      | NM_181877    |
| uc059mrx.1 | 3.03E-05 | DOWN | 1.3308383 | 1.3308383 | 0.4123353  | -1.501401  | -1.9137362 | ZSCAN2  | Homo sapiens zinc finger and SCAN domain containing 2 (ZSCAN2), transcript variant 1, mRNA. (from RefSeq NM_181877)      | NM_181877    |
| uc059mry.1 | 2.32E-04 | DOWN | 1.4622391 | 1.4622391 | 0.54817927 | -0.5980268 | -1.146206  | ZSCAN2  | Homo sapiens zinc finger and SCAN domain containing 2 (ZSCAN2), transcript variant 1, mRNA. (from RefSeq NM_181877)      | NM_181877    |
| uc059msa.1 | 1.76E-04 | DOWN | 1.2959998 | 1.2959998 | 0.37406546 | -1.1061901 | -1.4802556 | ZSCAN2  | Homo sapiens zinc finger and SCAN domain containing 2 (ZSCAN2), transcript variant 1, mRNA. (from RefSeq NM_181877)      | NM_181877    |
| uc032wpp.2 | 6.69E-04 | DOWN | 1.255474  | 1.255474  | 0.3282321  | -0.3200883 | -0.6483204 | ZSCAN26 | Homo sapiens zinc finger and SCAN domain containing 26 (ZSCAN26), transcript variant d, mRNA. (from RefSeq NM_001287421) | NM_001287421 |
| uc059pye.1 | 7.08E-04 | DOWN | 1.2240224 | 1.2240224 | 0.29162994 | -1.0684617 | -1.3600916 | ZSCAN32 | Homo sapiens zinc finger and SCAN domain containing 32 (ZSCAN32), transcript variant 3, mRNA. (from RefSeq NM_001284528) | NM_001284528 |



**Supplementary Table 4. Summary of published manuscripts linking progenitor cell changes to atherosclerosis.**

| First         | Last       | Journal           | Year | Source | Method                                            | Endnote                                                                 | DOI/PMID                                      |                              |
|---------------|------------|-------------------|------|--------|---------------------------------------------------|-------------------------------------------------------------------------|-----------------------------------------------|------------------------------|
| Vasa et al    | Dimmeler   | Circ Res          | 2001 | blood  | EPC isolated by adhesion                          | KDR+/CD34+ by flow                                                      | EPC reduced in CAD, - correlation w risks     | 10.1161/hh1301.093953        |
| D'Ippolito    | Schiller   | J. Cell Science   | 2004 | marrow | MIAMI, marrow isolated adult multilineage indi    | adhesion                                                                | CD81 positive, CD34 neg!                      | 10.1242/jcs.01103            |
| Damani        | Topol      | Sci. Trans Med    | 2012 | blood  | 3 channel microscopy                              | Circ Endo Cells                                                         | multinuclear predict acute MI                 | 10.1126/scitranslmed.3003451 |
| Bielak        | Peysers    | Clinical Medicine | 2009 | blood  | flow                                              | CD34+ cell count                                                        | correlates with Ca score                      |                              |
| Hill          | Finkel     | NEJM              | 2003 | blood  | colony forming units from 45 men                  | EPC, vascular function, cv risk (-0.47) and vasodilation (0.            | 25966                                         | 10.1056/NEJMoa022287         |
| Schmidt-Lucke | Dimmeler   | Circulation       | 2005 | blood  | flow for CD34+/KDR+                               | reduced EPC associated with higher events, 43 con vs 44 with stable cad |                                               |                              |
| Schmidt-Lucke | Dimmeler   | Atherosclerosis   | 2010 | blood  | flow for CD34+/KDR+ and apop EPC                  | statins, not ezetimibe reduced EPC apop                                 |                                               |                              |
| Hristov       | Weber      | Atherosclerosis   | 2007 | blood  | flow for CD34+/KDR+                               | statins reduced EPC numbers                                             |                                               |                              |
| Schmidt-Lucke | Dimmeler   | PLOS One          | 2010 | blood  | ISHAGE gating on flow for CD45(dim)/CD34+/Kt      | confirm reduced EPC in CAD and statin effect                            | 25967                                         | 10.1371/journal.pone.0013790 |
| Werner        | Nickenig   | NEJM              | 2005 | blood  | flow for CD34+/KDR+                               | high EPC had lower event rate, but not predictive of MI                 |                                               |                              |
| Chen          | Chang      | Int Heart J       | 2006 | blood  | flow CD34+/KDR+ and CD62E or CD31                 | no age related change in healthy subjects 20-61                         | 16479045                                      |                              |
| Laufs         |            | Circulation       | 2004 | blood  |                                                   | physical training increases EPC numbers                                 |                                               |                              |
| Heiss         |            | JACC              | 2005 | blood  |                                                   | EPC in age related dysfunction                                          |                                               |                              |
| Kunz          |            | Am Ht Journal     | 2006 | blood  |                                                   | EPC predict CAD severity                                                |                                               |                              |
| Fadini        |            | Stroke            | 2006 | blood  | flow CD34+/KDR+                                   | EPC predicts subclinical atherosclerosis                                |                                               |                              |
| Rauscher      |            | Circulation       | 2003 | blood  | BM EPC treatment prevents athero in Apo E mice    |                                                                         | 10.1161/01.CIR.0000082924.75945.48            |                              |
| Fadini        | Werner     | PLOS One          | 2010 | blood  | meta-analysis of 1,057 patients                   | CPC helped predict MACE in high risk patients                           | 10.1371/journal.pone.0011488                  |                              |
| Pirro         | Mannarino  | Atherosclerosis   | 2008 | blood  | flow CD34+/KDR+                                   | EPC, and EPC microparticles reduced with high risk                      |                                               |                              |
| Bonello       | Sabatier   | J Thromb Haem     | 2012 | blood  | flow CD34+/KDR+                                   | EPC changes, not level, predict restenosis after BMS                    | 10.1111/j.1538-7836.2012.04854.x              |                              |
| Chen          | Zhu        | Clinical Science  | 2004 | blood  | adhesion to FN                                    | EPC levels lower in hypercholesterolemia                                |                                               |                              |
| Muller-Ehmsen | Flesch     | Eur Heart Jour    | 2008 | blood  | CD34 and KDR, and AC133                           | CPC lower in obesity                                                    | 10.1093/eurheartj/ehn213                      |                              |
| Boos          | Lip        | J Thromb Haem     | 2008 | blood  | immunobeads, vWF, sEel, sFas, sFasL Elisa         | CEC associated with MACE and CV death                                   | 10.1111/j.1538-7836.2008.03148.x              |                              |
| <b>Arrays</b> |            |                   |      |        |                                                   |                                                                         |                                               |                              |
| Liu et al     |            | Physiol Gen       | 2011 |        | CD34+ immunomagnetic, Isolex300i                  | CD34+ differentiated with cytokines                                     | 10.1152/physiolgenomics.00099.2011            |                              |
| Ahrens        | Agrotis    | PLOS One          | 2011 |        | EPC isolation improved by culture method          | Cord blood elevated II-37, PDK4, A2M                                    | 10.1371/journal.pone.0023210                  |                              |
| Cheng         | Lee        | BMC Medical Ger   | 2012 |        | leukocyt divided by high risk, ie FH, vs low risk | found 56 biomarkers of risk                                             | http://www.biomedcentral.com/1755-8794/5/2    |                              |
| Huang CC      | MESA       | Physiol Genomics  | 2011 | PBL    | females divided by Ca score, about 300            | 409 transcripts found race associate genes also                         | 10.1152/physiolgenomics.00243.2010            |                              |
| Colombo       | Marina Cam | Thr. Res          | 2011 |        | platelets stable angina vs non ST coronary        | 45 transcripts found GP1BB                                              | 10.1016/j.thromres.2011.02.012                |                              |
| Brinch        | Kolvraa    | Prenatal Diagnosi | 2012 |        | materna magnetic sorting, microarray              | 28 transcripts mmp14, mcam, kcnq4, cldn6, F3                            |                                               |                              |
| Kraan         | Horrevoets | BMC Genomics      | 2010 | blood  | magnetic beads for CD34, CD14, CD4, 60 ml         | Illumina BeadChip retinoic acid signature                               | http://www.biomedcentral.com/1471-2164/11/388 |                              |



Supplementary Table 6. Correlations of TRACs with known Treg markers.

| Gene Symbol          | FOXP3  | PSORS  | AHRR   | DLG1   | IL12A  | ICOSLG | PDCD1  | CD88   | TRIM28 | TCF3   | CD68   | IKZF4  | DGKA   | CD27   | B3GAT1 | SMYD3  | B3GAT1 | ICOS  | PTPRC  | RUNX1 | ICOS  | CD8A  | CD4   | CD27  | IL2RA |        |          |
|----------------------|--------|--------|--------|--------|--------|--------|--------|--------|--------|--------|--------|--------|--------|--------|--------|--------|--------|-------|--------|-------|-------|-------|-------|-------|-------|--------|----------|
| IL2RA                | 0.220  | 0.135  | 0.035  | 0.166  | -0.240 | 0.179  | -0.011 | 0.160  | 0.085  | 0.130  | 0.211  | 0.080  | 0.294  | 0.368  | -0.111 | 0.111  | 0.061  | 0.596 | 0.100  | 0.413 | 0.619 | 0.177 | 0.184 | 0.285 | 1     | IL2RA  |          |
| CD27                 | 0.083  | -0.106 | 0.006  | -0.099 | -0.081 | 0.255  | 0.272  | 0.115  | 0.163  | 0.133  | 0.349  | -0.269 | 0.072  | 0.594  | 0.300  | -0.129 | 0.240  | 0.233 | -0.345 | 0.214 | 0.189 | 0.214 | 0.504 | 1.000 |       | CD27   |          |
| CD4                  | -0.073 | -0.237 | -0.202 | -0.128 | -0.229 | 0.066  | 0.109  | 0.092  | 0.198  | -0.150 | 0.606  | -0.176 | 0.078  | 0.363  | 0.065  | -0.087 | -0.103 | 0.311 | -0.158 | 0.167 | 0.273 | 0.093 | 1.000 |       |       | CD4    |          |
| CD8A                 | 0.534  | 0.056  | 0.380  | 0.245  | 0.009  | 0.299  | 0.390  | 0.517  | 0.430  | 0.031  | 0.266  | 0.042  | 0.114  | 0.462  | 0.065  | 0.062  | 0.224  | 0.150 | -0.212 | 0.358 | 0.075 | 1.000 |       |       |       | CD8A   |          |
| ICOS                 | 0.115  | 0.167  | 0.024  | 0.272  | -0.263 | 0.024  | -0.090 | 0.473  | 0.156  | 0.006  | 0.187  | 0.039  | 0.468  | 0.261  | -0.128 | 0.091  | -0.097 | 0.874 | 0.223  | 0.171 | 1.000 |       |       |       |       | ICOS   |          |
| RUNX1                | 0.363  | -0.029 | 0.084  | 0.044  | -0.057 | 0.189  | 0.113  | 0.012  | -0.037 | -0.311 | 0.499  | -0.078 | -0.142 | 0.099  | 0.105  | 0.129  | 0.484  | 0.247 | -0.185 | 1.000 |       |       |       |       |       | RUNX1  |          |
| PTPRC                | -0.309 | 0.035  | -0.188 | 0.235  | -0.191 | -0.214 | -0.459 | 0.095  | -0.042 | -0.015 | -0.086 | 0.228  | 0.227  | -0.028 | -0.476 | 0.113  | -0.449 | 0.050 | 1.000  |       |       |       |       |       |       | PTPRC  |          |
| ICOS                 | 0.231  | 0.179  | 0.059  | 0.266  | -0.214 | 0.041  | 0.066  | 0.412  | 0.134  | -0.057 | 0.203  | 0.011  | 0.351  | 0.280  | 0.031  | 0.054  | 0.053  | 1.000 |        |       |       |       |       |       |       | ICOS   |          |
| B3GAT1               | 0.353  | 0.107  | 0.299  | -0.136 | 0.042  | 0.069  | 0.349  | -0.181 | -0.107 | -0.118 | 0.176  | -0.129 | -0.241 | -0.149 | 0.638  | 0.017  | 1.000  |       |        |       |       |       |       |       |       | B3GAT1 |          |
| SMYD3                | 0.082  | 0.263  | 0.030  | 0.196  | -0.086 | -0.065 | -0.091 | 0.123  | -0.015 | 0.004  | -0.079 | 0.002  | 0.042  | -0.044 | -0.034 | 1.000  |        |       |        |       |       |       |       |       |       | SMYD3  |          |
| B3GAT1               | 0.165  | 0.098  | 0.244  | -0.209 | 0.083  | 0.105  | 0.589  | -0.091 | -0.119 | -0.106 | 0.003  | -0.147 | -0.253 | -0.166 | 1.000  |        |        |       |        |       |       |       |       |       |       | B3GAT1 |          |
| CD27                 | 0.187  | -0.031 | 0.090  | 0.212  | -0.186 | 0.268  | 0.052  | 0.416  | 0.518  | 0.216  | 0.305  | -0.011 | 0.387  | 1.000  |        |        |        |       |        |       |       |       |       |       |       | CD27   |          |
| DGKA                 | 0.178  | 0.042  | 0.341  | 0.288  | -0.311 | 0.330  | -0.034 | 0.382  | 0.346  | 0.197  | -0.073 | 0.214  | 1.000  |        |        |        |        |       |        |       |       |       |       |       |       | DGKA   |          |
| IKZF4                | 0.130  | 0.254  | 0.197  | 0.182  | -0.003 | 0.039  | -0.022 | 0.028  | 0.291  | 0.218  | -0.189 | 1.000  |        |        |        |        |        |       |        |       |       |       |       |       |       | IKZF4  |          |
| CD68                 | 0.075  | -0.093 | -0.140 | -0.118 | -0.163 | 0.020  | 0.081  | 0.141  | 0.169  | -0.163 | 1.000  |        |        |        |        |        |        |       |        |       |       |       |       |       |       |        | CD68     |
| TCF3                 | 0.061  | 0.189  | 0.163  | 0.176  | -0.127 | 0.121  | 0.096  | 0.108  | 0.308  | 1.000  |        |        |        |        |        |        |        |       |        |       |       |       |       |       |       |        | TCF3     |
| TRIM28               | 0.213  | 0.010  | 0.208  | 0.085  | -0.171 | 0.207  | 0.180  | 0.394  | 1.000  |        |        |        |        |        |        |        |        |       |        |       |       |       |       |       |       |        | TRIM28   |
| CD88                 | 0.203  | 0.186  | 0.224  | 0.412  | -0.176 | 0.076  | 0.075  | 1.000  |        |        |        |        |        |        |        |        |        |       |        |       |       |       |       |       |       |        | CD88     |
| PDCD1                | 0.480  | 0.186  | 0.444  | 0.086  | 0.135  | 0.288  | 1.000  |        |        |        |        |        |        |        |        |        |        |       |        |       |       |       |       |       |       |        | PDCD1    |
| ICOSLG               | 0.407  | 0.010  | 0.387  | 0.088  | 0.000  | 1.000  |        |        |        |        |        |        |        |        |        |        |        |       |        |       |       |       |       |       |       |        | ICOSLG   |
| IL12A                | 0.151  | 0.080  | 0.164  | -0.058 | 1.000  |        |        |        |        |        |        |        |        |        |        |        |        |       |        |       |       |       |       |       |       |        | IL12A    |
| DLG1                 | 0.315  | 0.283  | 0.279  | 1.000  |        |        |        |        |        |        |        |        |        |        |        |        |        |       |        |       |       |       |       |       |       |        | DLG1     |
| AHRR                 | 0.722  | 0.480  | 1.000  |        |        |        |        |        |        |        |        |        |        |        |        |        |        |       |        |       |       |       |       |       |       |        | AHRR     |
| PSORS1C1             | 0.352  | 1.000  |        |        |        |        |        |        |        |        |        |        |        |        |        |        |        |       |        |       |       |       |       |       |       |        | PSORS1C1 |
| FOXP3                | 1.000  |        |        |        |        |        |        |        |        |        |        |        |        |        |        |        |        |       |        |       |       |       |       |       |       |        | FOXP3    |
| correlation w. FOXP3 |        | PSORS  | AHRR   | DLG1   | IL12A  | ICOSLG | PDCD1  | CD88   | TRIM28 | TCF3   | CD68   | IKZF4  | DGKA   | CD27   | B3GAT1 | SMYD3  | B3GAT1 | ICOS  | PTPRC  | RUNX1 | ICOS  | CD8A  | CD4   | CD27  | IL2RA |        |          |

Supplementary Table 7. DEG common to Discovery and Validation Cohorts.

| UCSC ID    | p ([CAD] Vs [Regulation ( FC (abs) ([CA FC ([CAD] Vs Log FC ([CAD [CAD](raw) [LOW](raw) start of trans Description | chr       | SeqLL TRACIT3 INOVA HG38 SeqLL | mat STRESS | SeqLL TRACIT1 GWU HG38 SeqLL | SeqLL TRACIT1 GWU HG19 Seqll |           |                                                            |  |  |  |
|------------|--------------------------------------------------------------------------------------------------------------------|-----------|--------------------------------|------------|------------------------------|------------------------------|-----------|------------------------------------------------------------|--|--|--|
| UCSC ID    | p ([CAD] Vs [Regulation ( FC (abs) ([CA FC ([CAD] Vs Log FC ([CAD [CAD](raw) [LOW](raw) start of trans Description | chr       | Gene Name                      | mat STRESS | CathDx 599 list              | CathDx                       |           |                                                            |  |  |  |
| uc061hhh.1 | 0.00466694 up                                                                                                      | 3.1491892 | 3.1491892                      | 1.6549804  | 0.08496023                   | 0.02697844                   | 26308175  | Adhesion G Protein-Coupled Receptor F3. (from Un chr2      |  |  |  |
| uc063gxp.1 | 0.00544914 down                                                                                                    | 1.2519302 | -1.2519302                     | -0.3241542 | 4.696951                     | 5.8802547                    | 132897203 | AF4/FMR2 family, member 4 (from HGNC AFF4) chr5            |  |  |  |
| uc061wik.1 | 0.00476174 down                                                                                                    | 1.4414719 | -1.4414719                     | -0.5275428 | 0.92420864                   | 1.3322208                    | 34291464  | adenosylhomocysteine (from HGNC AHCY) chr20                |  |  |  |
| uc062bv.1  | 8.58E-04 down                                                                                                      | 9.211627  | -9.211627                      | -3.203456  | 0.0066789                    | 0.06152349                   | 20965176  | apoptosis-inducing factor, mitochondrion-associate chr22   |  |  |  |
| uc062eav.1 | 1.45E-04 down                                                                                                      | 9.639785  | -9.639785                      | -3.269001  | 0.03060729                   | 0.29504773                   | 37833008  | Ankyrin Repeat Domain 54. (from UniProt C9JX82) chr22      |  |  |  |
| uc057shp.1 | 0.00793906 down                                                                                                    | 1.3702843 | -1.3702843                     | -0.4544753 | 0.50020045                   | 0.6854169                    | 24629013  | Rho GTPase activating protein 21 (from HGNC ARH chr10      |  |  |  |
| uc060lgs.1 | 0.00771698 down                                                                                                    | 4.540955  | -4.540955                      | -2.1829958 | 0.037111                     | 0.16851938                   | 81097578  | BAI1 Associated Protein 2. (from UniProt I3L0Y9) chr17     |  |  |  |
| uc059uld.1 | 0.00893112 down                                                                                                    | 1.2283325 | -1.2283325                     | -0.2967012 | 2.237617                     | 2.7485378                    | 56484344  | Bardet-Biedl syndrome 2 (from HGNC BBS2) chr16             |  |  |  |
| uc061hmb.1 | 0.00518361 down                                                                                                    | 4.071977  | -4.071977                      | -2.0257294 | 0.0617337                    | 0.2513782                    | 27241920  | Carbamoyl-Phosphate Synthetase 2, Aspartate, Bel chr2      |  |  |  |
| uc058qob.1 | 0.00997198 up                                                                                                      | 3.9418516 | 3.9418516                      | 1.9788735  | 0.45921156                   | 0.11649641                   | 67269717  | cullin-associated and neddylation-dissociated 1 (frc chr12 |  |  |  |
| uc058svy.1 | 0.00836163 down                                                                                                    | 1.2155546 | -1.2155546                     | -0.281647  | 3.5544074                    | 4.320576                     | 108658880 | Belongs to the WD repeat coronin family. (from Ur chr12    |  |  |  |
| uc058zud.1 | 0.00311815 down                                                                                                    | 3.6590462 | -3.6590462                     | -1.8714676 | 0.00556233                   | 0.02035282                   | 24071588  | copine VI (neuronal) (from HGNC CPNE6) chr14               |  |  |  |
| uc061oas.1 | 0.00893666 down                                                                                                    | 1.251643  | -1.251643                      | -0.3238231 | 2.9431279                    | 3.6837454                    | 135906823 | aspartyl-tRNA synthetase (from HGNC DARS) chr2             |  |  |  |
| uc062lxl.1 | 0.00727313 down                                                                                                    | 3.096001  | -3.096001                      | -1.6304059 | 0.01418335                   | 0.04391168                   | 98807910  | discoidin, CUB and LCCL domain containing 2 (from chr3     |  |  |  |
| uc063naw.1 | 0.00208251 down                                                                                                    | 1.2229795 | -1.2229795                     | -0.2904003 | 5.738689                     | 7.018299                     | 31530242  | DEAD (Asp-Glu-Ala-Asp) box polypeptide 39B (from chr6      |  |  |  |
| uc063hco.1 | 0.00609706 down                                                                                                    | 5.3292775 | -5.3292775                     | -2.41394   | 0.0663546                    | 0.35362202                   | 134773784 | DEAD (Asp-Glu-Ala-Asp) box polypeptide 46 (from chr5       |  |  |  |
| uc058viq.1 | 0.00960035 down                                                                                                    | 2.0436409 | -2.0436409                     | -1.0311416 | 0.44386658                   | 0.90710384                   | 132139112 | DEAD (Asp-Glu-Ala-Asp) box polypeptide 51 (from chr12      |  |  |  |
| uc058pcp.1 | 0.00954773 up                                                                                                      | 1.4104319 | 1.4104319                      | 0.49613696 | 4.2960267                    | 3.0458946                    |           | diacylglycerol kinase, alpha 80kDa (from HGNC DGI chr12    |  |  |  |
| uc002app.4 | 0.00721339 down                                                                                                    | 1.2387679 | -1.2387679                     | -0.3089059 | 1.1705571                    | 1.4500486                    | 66293216  | DIS3 like exosome 3'-5' exoribonuclease (DIS3L), tr. chr15 |  |  |  |
| uc064ljj.1 | 0.00664018 down                                                                                                    | 1.44623   | -1.44623                       | -0.5322971 | 1.3436074                    | 1.9431655                    | 26627214  | dihydropyrimidinase-like 2 (from HGNC DPYSL2) chr8         |  |  |  |
| uc063pfd.1 | 0.00451893 down                                                                                                    | 5.760368  | -5.760368                      | -2.526161  | 0.03775852                   | 0.21750295                   | 56617199  | Dystonin. (from UniProt H0YAT7) chr6                       |  |  |  |
| uc058pzo.1 | 7.35E-04 down                                                                                                      | 1.4873667 | -1.4873667                     | -0.5727603 | 0.60503316                   | 0.8999062                    | 57604638  | Deltex E3 Ubiquitin Ligase 3. (from UniProt F8VUZ) chr12   |  |  |  |
| uc059lkd.1 | 0.00922576 down                                                                                                    | 1.421449  | -1.421449                      | -0.5073623 | 0.8373783                    | 1.1902905                    | 74655793  | Enhancer Of MRNA Decapping 3. (from UniProt H3) chr15      |  |  |  |
| uc064lhm.1 | 0.00821887 down                                                                                                    | 1.253947  | -1.253947                      | -0.3264764 | 2.252565                     | 2.824597                     | 28118897  | elongator acetyltransferase complex subunit 3 (froi chr8   |  |  |  |
| uc058bhy.1 | 0.00430335 down                                                                                                    | 1.3011535 | -1.3011535                     | -0.3797912 | 4.9715977                    | 6.468812                     | 47732481  | formin binding protein 4 (from HGNC FNBP4) chr11           |  |  |  |
| uc062llr.1 | 0.00234395 down                                                                                                    | 1.2440604 | -1.2440604                     | -0.3150565 | 7.420352                     | 9.231366                     | 70968847  | forkhead box P1 (from HGNC FOXP1) chr3                     |  |  |  |
| uc002utu.4 | 0.00690295 down                                                                                                    | 1.2726772 | -1.2726772                     | -0.3478665 | 1.6410824                    | 2.0885682                    | 196780088 | general transcription factor IIIC subunit 3 (GTF3C3) chr2  |  |  |  |
| uc058igy.1 | 0.00498888 down                                                                                                    | 1.2429291 | -1.2429291                     | -0.3137444 | 0.8698461                    | 1.0811571                    | 119131438 | histone H4 transcription factor (from HGNC HINFP) chr11    |  |  |  |
| uc059vpb.1 | 0.00656629 down                                                                                                    | 5.5908747 | -5.5908747                     | -2.483074  | 0.01402885                   | 0.07843354                   | 67165524  | Heat Shock Transcription Factor 4. (from UniProt H chr16   |  |  |  |
| uc061qzm.1 | 0.00504353 down                                                                                                    | 1.420102  | -1.420102                      | -0.5059946 | 2.0935285                    | 2.9730241                    | 197496890 | Heat Shock Protein Family D (Hsp60) Member 1 (cf chr2      |  |  |  |
| uc059mbz.1 | 0.00979137 down                                                                                                    | 4.922826  | -4.922826                      | -2.2994866 | 0.04578593                   | 0.22539617                   | 78163715  | Isocitrate Dehydrogenase 3 (NAD(+)) Alpha. (from chr15     |  |  |  |
| uc001vnf.2 | 0.00700541 down                                                                                                    | 1.237847  | -1.237847                      | -0.307833  | 1.0729606                    | 1.328161                     | 97976631  | Importin 5                                                 |  |  |  |
| uc057sqt.1 | 0.0056646 down                                                                                                     | 1.2380247 | -1.2380247                     | -0.3084001 | 8.723372                     | 10.799751                    | 32929984  | Integrin Subunit Beta 1. (from UniProt C9JNE0) chr10       |  |  |  |
| uc058nxx.1 | 1.30E-04 down                                                                                                      | 1.5037236 | -1.5037236                     | -0.5885394 | 1.5619553                    | 2.3487492                    | 15048312  | LETM1 domain containing 1 (from HGNC LETMD1) chr12         |  |  |  |
| uc001fnf.3 | 0.00678139 down                                                                                                    | 1.2709522 | -1.2709522                     | -0.3459098 | 1.1653022                    | 1.4810433                    | 156082577 | lamin A/C (LMNA), transcript variant 2. mRNA. (frc chr1    |  |  |  |
| uc064sik.1 | 0.00679545 down                                                                                                    | 1.3376278 | -1.3376278                     | -0.4196767 | 2.030512                     | 2.7160695                    | 20346405  | MLLT3 Super Elongation Complex Subunit. (from U chr9       |  |  |  |
| uc002aze.3 | 0.0059149 down                                                                                                     | 1.316997  | -1.316997                      | -0.3972521 | 1.3843883                    | 1.8232353                    | 74890041  | mannose phosphate isomerase (MPI), transcript va chr15     |  |  |  |
| uc057skx.1 | 0.00291165 down                                                                                                    | 1.2832036 | -1.2832036                     | -0.3357501 | 3.3767724                    | 4.3030865                    | 28054142  | Membrane Palmitoylated Protein 7. (from UniProt chr10      |  |  |  |
| uc060bvl.1 | 0.00599846 down                                                                                                    | 1.3389245 | -1.3389245                     | -0.4210746 | 1.2934629                    | 1.7318492                    | 17179557  | Myosin Phosphatase Rho Interacting Protein. (from chr17    |  |  |  |
| uc057uah.1 | 0.00393548 down                                                                                                    | 1.2238083 | -1.2238083                     | -0.2913776 | 4.7361636                    | 5.796156                     | 73250740  | mitochondrial ribosomal protein S16 (from HGNC chr10       |  |  |  |
| uc061ipi.1 | 0.00567156 down                                                                                                    | 5.6448393 | -5.6448393                     | -2.4969325 | 0.03140524                   | 0.17727755                   | 42568167  | metastasis associated 1 family, member 3 (from H chr2      |  |  |  |
| uc059cjt.1 | 0.0030653 down                                                                                                     | 6.661544  | -6.661544                      | -2.7358565 | 0.02530567                   | 0.16857481                   | 64457996  | methylenetetrahydrofolate dehydrogenase (NADP+ chr14       |  |  |  |
| uc061jge.1 | 0.00261511 down                                                                                                    | 1.259208  | -1.259208                      | -0.3325166 | 1.658834                     | 2.088817                     | 55236620  | Mitochondrial Translational Initiation Factor 2 chr2       |  |  |  |
| uc003wxt.4 | 0.00769938 down                                                                                                    | 2.4843318 | -2.4843318                     | -1.3128579 | 0.05885801                   | 0.14622281                   | 17643803  | microtubule associated tumor suppressor 1 (MTUS chr8       |  |  |  |
| uc059zfb.1 | 0.00387835 down                                                                                                    | 5.238711  | -5.238711                      | -2.389212  | 0.0739109                    | 0.38719785                   | 1468222   | myosin IC (from HGNC MYO1C) chr17                          |  |  |  |
| uc061cul.1 | 0.0098469 down                                                                                                     | 4.928974  | -4.928974                      | -2.3012874 | 0.03456391                   | 0.1703646                    | 54973993  | NLR Family Pyrin Domain Containing 2. (from UniP chr19     |  |  |  |

| SeqLL TRACIT3 INOVA HG38 SeqLL | mat STRESS | SeqLL TRACIT1 GWU HG38 SeqLL | SeqLL TRACIT1 GWU HG19 Seqll |
|--------------------------------|------------|------------------------------|------------------------------|
| Gene Name                      | mat STRESS | CathDx 599 list              | CathDx                       |
| Gen80 664 list                 |            |                              |                              |
| ADGRF3                         | c          | ADGRG3                       |                              |
| AFF4                           | c          | AFF3                         |                              |
| AHCY                           | a          |                              | AHCYL2                       |
| AIFM3                          | a          |                              | AIFM3                        |
| ANKRD54                        | a          | ANKHD1                       | ANKRD54                      |
| ARHGAP21                       | a          |                              | ARHGAP22                     |
| BAIAP2                         | e          | BAIAP2                       | BAIAP3                       |
| BBS2                           | a          |                              | BBS2                         |
| CAD                            | a          |                              | CAD                          |
| CAND1                          | a          |                              | CAND2                        |
| CORO1C                         | a          | CORO1B                       | CORO6                        |
| CPNE6                          | a          |                              | CPNE3                        |
| DARS                           | a          | hypoxia                      | DARS                         |
| DCBLD2                         | c          | DCBLD1                       |                              |
| DDX39B                         | a          |                              | DDX39A                       |
| DDX46                          | c          | DDX47                        | DDX42                        |
| DDX51                          | a          | DDX50                        | DDX51                        |
| DGKA                           |            | DGKA                         | DGKA                         |
| DIS3L                          | e          | DIS3L2                       | DIS3                         |
| DPYSL2                         | a          | DPYSL2                       | DPYSL3                       |
| DST                            | o          | DST                          |                              |
| DTX3                           | c          | DTX3L                        | DTX1                         |
| EDC3                           | e          | EDC3                         | EDC3                         |
| ELP3                           | c          |                              | ELP2                         |
| FNBP4                          | e          | FNBP4                        |                              |
| FOXP1                          | e          | FOXP1                        | FOXP1, 1132                  |
| GTF3C3                         | a          | GTF2H4                       | GTF3C3                       |
| HINFP                          | e          | HINFP                        |                              |
| HSF4                           | a          | Heat Shock                   | HSF4                         |
| HSPD1                          | c          | HSPD1                        | HSPE1                        |
| IDH3A                          | a          |                              | IDH1                         |
| IPOS                           | c          |                              | IPO11                        |
| ITGB1                          | a          | ITGB1                        | ITGB1                        |
| LETMD1                         | a          |                              | LETMD1                       |
| LMNA                           | a          | LMNA                         | LMNA                         |
| MLLT3                          | a          |                              | MLLT3                        |
| MPI                            | a          |                              | MPI                          |
| MPP7                           | a          |                              | MPP2                         |
| MPRIP                          | a          | stress fibers                | MPRIIP                       |
| MRPS16                         | c          |                              | MRPS31                       |
| MTA3                           | a          |                              | MTA3                         |
| MTHFD1                         | e          | MTHFD1                       | MTHFD1L                      |
| MTIF2                          | a          | hypoxia down                 | 292270                       |
| MTUS1                          | a          |                              | MTUS2                        |
| MYO1C                          | e          | MYO6                         | MYO1E                        |
| NLRP2                          | a          | aging                        | NLRP2,                       |

|            |            |      |           |            |            |            |            |           |                                                      |           |       |
|------------|------------|------|-----------|------------|------------|------------|------------|-----------|------------------------------------------------------|-----------|-------|
| uc002rcy.4 | 0.00504953 | down | 1.4440056 | -1.4440056 | -0.5300763 | 0.27387014 | 0.39547002 | 18555544  | NT5C1B-RDH14 readthrough (NT5C1B-RDH14).             | trar      | chr2  |
| uc004bve.4 | 0.0090192  | down | 1.2714772 | -1.2714772 | -0.3465056 | 0.6369028  | 0.8098074  | 128456918 | outer dense fiber of sperm tails 2 (ODF2).           | transcrip | chr9  |
| uc058upy.1 | 0.00163712 | down | 1.3608307 | -1.3608307 | -0.4444875 | 0.9761837  | 1.3284208  | 122975241 | 2-oxoglutarate and iron-dependent oxygenase dom      |           | chr12 |
| uc062htp.1 | 2.85E-04   | down | 11.307217 | -11.307217 | -3.499172  | 0.02170722 | 0.24544828 | 31683968  | oxysterol binding protein-like 10 (from HGNC OSBP)   |           | chr3  |
| uc062axf.1 | 0.00935585 | down | 3.932247  | -3.932247  | -1.9753538 | 0.01675902 | 0.06590062 | 45849989  | Poly(RC) Binding Protein 3 Contains 3 KH domains     |           | chr21 |
| uc061apt.1 | 0.00386926 | down | 5.2680926 | -5.2680926 | -2.3972807 | 0.02025118 | 0.1066851  | 48097764  | phospholipase A2, group IVC (cytosolic, calcium-inc) |           | chr19 |
| uc002eso.5 | 0.00228795 | down | 1.5580505 | -1.5580505 | -0.639742  | 0.17257616 | 0.26888236 | 67277509  | pleckstrin homology and RhoGEF domain containin      |           | chr16 |
| uc060epe.1 | 0.00396322 | down | 6.754754  | -6.754754  | -2.7559032 | 0.01532278 | 0.1035016  | 39072013  | plexin domain containing 1 (from HGNC PLXDC1)        |           | chr17 |
| uc060qvd.1 | 0.00637629 | down | 1.200787  | -1.200787  | -0.2639802 | 5.5362716  | 6.6478825  | 1088147   | polymerase (RNA) II (DNA directed) polypeptide E.    |           | chr19 |
| uc060ihp.1 | 0.00965993 | down | 1.2412302 | -1.2412302 | -0.3117708 | 1.7525004  | 2.1752565  | 60600182  | Protein Phosphatase, Mg2+/Mn2+ Dependent 1D          |           | chr17 |
| uc062rrj.1 | 0.00865548 | down | 1.2024927 | -1.2024927 | -0.2660281 | 4.875126   | 5.8623033  | 195519160 | Protein Phosphatase 1 Regulatory Inhibitor Subunit   |           | chr3  |
| uc064zfq.1 | 0.00463741 | down | 1.4196897 | -1.4196897 | -0.5055756 | 0.43235695 | 0.6138127  | 49269842  | Glycogen-targeting subunit for protein phosphatase   |           | chrX  |
| uc057ubg.1 | 0.0052754  | down | 3.086338  | -3.086338  | -1.6258961 | 0.15896747 | 0.49062735 | 73496286  | PPP3CB antisense RNA 1 (head to head) (from HGNC)    |           | chr10 |
| uc058nma.1 | 0.00124233 | down | 1.2204394 | -1.2204394 | -0.2874007 | 2.856492   | 3.4861758  | 49003809  | Protein Kinase AMP-Activated Non-Catalytic Subunit   |           | chr12 |
| uc002dzb.2 | 0.00304907 | down | 1.2940506 | -1.2940506 | -0.371894  | 1.6394578  | 2.1215413  | 30654108  | proline rich 14 (from HGNC PRR14)                    |           | chr16 |
| uc064wqo.1 | 0.001422   | down | 1.3874075 | -1.3874075 | -0.4723916 | 4.342514   | 6.0248365  | 131473593 | Proline Rich Coiled-Coil 2B. (from UniProt Q5JSZ9)   |           | chr9  |
| uc057zit.1 | 0.00307177 | down | 1.4568127 | -1.4568127 | -0.5428155 | 1.6053652  | 2.3387163  | 14610853  | proteasome (prosome, macropain) subunit, alpha t     |           | chr11 |
| uc058zoc.1 | 0.00158443 | down | 1.4917963 | -1.4917963 | -0.5770505 | 1.4193069  | 2.1173165  | 23016542  | Belongs to the peptidase T1B family. (from UniProt)  |           | chr14 |
| uc060eva.1 | 0.00102343 | down | 1.2573454 | -1.2573454 | -0.3303811 | 3.3179946  | 4.171865   | 39986608  | proteasome (prosome, macropain) 26S subunit, no      |           | chr17 |
| uc062hhe.1 | 0.00257963 | down | 1.275671  | -1.275671  | -0.3512563 | 7.6515155  | 9.760817   | 18414948  | SATB homeobox 1 (from HGNC SATB1)                    |           | chr3  |
| uc002ubx.5 | 0.00848147 | down | 2.115307  | -2.115307  | -1.080867  | 0.1222189  | 0.25853053 | 161624425 | Solute carrier family 4 member 10 (SLC4A10).         | tran:     | chr2  |
| uc064ikc.1 | 0.00143057 | down | 1.2051876 | -1.2051876 | -0.2692577 | 1.2460814  | 1.5017617  | 138460548 | Tripartite Motif Containing 24. (from UniProt A0A0)  |           | chr7  |
| uc061qdv.1 | 0.00461844 | up   | 1.4030657 | 1.4030657  | 0.48858255 | 2.0478244  | 1.4595356  | 178528739 | TTN antisense RNA 1 (from HGNC TTN-AS1)              |           | chr2  |
| uc064yux.1 | 0.00753835 | down | 1.2729685 | -1.2729685 | -0.3481967 | 1.1967776  | 1.5234601  | 47232865  | ubiquitin specific peptidase 11 (USP11). mRNA. (fr   |           | chrX  |
| uc062unl.1 | 0.00353547 | down | 1.3544748 | -1.3544748 | -0.4377335 | 0.5120621  | 0.69357514 | 1939280   | Wolf-Hirschhorn syndrome candidate 1 (from HGNC)     |           | chr4  |
| uc059ftl.1 | 0.00441255 | down | 6.35512   | -6.35512   | -2.6679194 | 0.01124214 | 0.07144516 | 103702015 | X-ray repair complementing defective repair in Chi   |           | chr14 |

|              |   |             |           |
|--------------|---|-------------|-----------|
| NT5C1B-RDH14 | e | NT5C3A      | NT5C3B    |
| ODF2         | e | ODF2L       | ODF2      |
| OGFOD2       | e | OGFOD1      | OGFOD2    |
| OSBPL10      | e | OSBPL9      | OSBPL10   |
| PCBP3        | e | PCBP2, PCBP | PCBP1-AS1 |
| PLA2G4C      | o |             | PLA2G10,  |
| PLEKHG4      | a |             | PLEKHG4   |
| PLXDC1       | c | PLXNC1      | PLXND1    |
| POLR2E       | c | POLR2B      | POLR2D    |
| PPM1D        | a |             | PPM1B     |
| PPP1R2       | c | PPP1R8      | PPP1R13B  |
| PPP1R3F      | a |             | PPP1CC    |
| PPP3CB-AS1   | e |             | PPP3CB-AS |
| PRKAG1       | a | PRKCE       | PRKAG1    |
| PRR14        | c |             | PRR14L    |
| PRRC2B       | a | PRRC2B      | PRRC2B    |
| PSMA1        | c |             | PSMA3     |
| PSMB5        | a | PSMD2       | PSMC5     |
| PSMD3        | c | PSMD2       | PSMD6     |
| SATB1        | c | AGE1        | SATB2     |
| SLC4A10      | a |             | SLC5A10   |
| TRIM24       | c | TRIM21      | TRIM47    |
| TTN-AS1      | e |             | TTN       |
| USP11        | e | USP11       | USP11     |
| WHSC1        | a |             | WHSC1     |
| XRCC3        | a |             | XRRA1     |
|              |   |             | XRCC3     |

**Supplementary Table 8. 26 Transcript exemplars common to both studies  
and to known stress granule transcripts.**

| STRESS<br>GRANULE |  | Discovery<br>HG19 | Discovery<br>HG38 | Validation<br>HG38 | MATCH<br>STRESS |
|-------------------|--|-------------------|-------------------|--------------------|-----------------|
| ANKHD1            |  | ANKRD54           |                   | ANKRD54            | c               |
| CORO1B            |  | CORO6             |                   | CORO1C             | c               |
| DDX31             |  | DDX39A            |                   | DDX39B             | c               |
| DDX47             |  | DDX42             |                   | DDX46              | c               |
| DDX50             |  | DDX51             |                   | DDX51              | c               |
| DDX58             |  | DDX51             |                   | DDX54              | c               |
| DIS3L2            |  |                   | DIS3              | DIS3L              | e               |
| DPYSL2            |  |                   | DPYSL2            | DPYSL2             | e               |
| DST               |  | DST               |                   | DST                | e               |
| DTX3L             |  |                   | DTX1              | DTX3               | e               |
| EDC3              |  |                   | EDC3              | EDC3               | e               |
| HSF4              |  | HSF4              |                   | HSF4               | e               |
| HSPD1             |  | HSPB3             | HSPE1             | HSPD1              | e               |
| ITGB1             |  | ITGB1             |                   | ITGB1              | e               |
| LMNA              |  | LMNA              |                   | LMNA               | e               |
| MTHFD1            |  |                   | MTHFD1            | MTHFD1             | e               |
| OGFOD1            |  | OGFOD2            | OGFOD2            | OGFOD2             | e               |
| OSBPL9            |  |                   | OSBPL10           | OSBPL10            | c               |
| PCBP2, PCBP1      |  |                   | PCBP1-AS1         | PCBP3              | c               |
| POLR2B            |  | POLR3GL           | POLR2D            | POLR2E             | c               |
| PPP1R8            |  | PPP1R10           | PPP1R13B          | PPP1R2             | c               |
| PRRC2B            |  | PRRC2B            |                   | PRRC2B             | e               |
| PSMD2             |  |                   | PSMD6             | PSMD3              | c               |
| SATB1             |  |                   | SATB2             | SATB1              | e               |
| TRIM21            |  | TRIM28            | TRIM47            | TRIM24             | c               |
| USP11             |  |                   | USP11             | USP11              | e               |

Supplementary Table 9. Cilia and/or synapse/immune synapse related transcripts

| UCSC ID    | p ([CAD] Vs [Regulation (  FC (abs) ([CA FC ([CAD] Vs Log FC ([CAD [CAD](raw) [LOW](raw) start of trans Description | chr       | SeqLL      | SeqLL      | SeqLL      |            |           |                                                      |          |   |        |        |          |
|------------|---------------------------------------------------------------------------------------------------------------------|-----------|------------|------------|------------|------------|-----------|------------------------------------------------------|----------|---|--------|--------|----------|
|            |                                                                                                                     |           | TRACIT3    | TRACIT1    | TRACIT1    |            |           |                                                      |          |   |        |        |          |
|            |                                                                                                                     |           | INOVA      | GWU        | GWU        |            |           |                                                      |          |   |        |        |          |
|            |                                                                                                                     |           | HG38       | HG38       | HG19       |            |           |                                                      |          |   |        |        |          |
|            |                                                                                                                     |           | SeqLL      | SeqLL      | Seqll      |            |           |                                                      |          |   |        |        |          |
|            |                                                                                                                     |           | Gene Name  | CathDx     | CathDx     |            |           |                                                      |          |   |        |        |          |
| uc061hhh.1 | 0.00466694 up                                                                                                       | 3.1491892 | 3.1491892  | 1.6549804  | 0.08496023 | 0.02697844 | 26308175  | Adhesion G Protein-Coupled Receptor F3. (from chr2   | ADGRF3   | c |        | ADGRG3 |          |
| uc057shp.1 | 0.00793906 down                                                                                                     | 1.3702843 | -1.3702843 | -0.4544753 | 0.50020045 | 0.6854169  | 24629013  | Rho GTPase activating protein 21 (from HGNC chr10    | ARHGAP21 | a |        |        | ARHGAP22 |
| uc059uld.1 | 0.00893112 down                                                                                                     | 1.2283325 | -1.2283325 | -0.2967012 | 2.237617   | 2.7485378  | 56484344  | Bardet-Biedl syndrome 2 (from HGNC BBS2) chr16       | BBS2     | a |        |        | BBS2     |
| uc058zuz.1 | 0.00311815 down                                                                                                     | 3.6590462 | -3.6590462 | -1.8714676 | 0.00556233 | 0.02035282 | 24071588  | copine VI (neuronal) (from HGNC CPNE6) chr14         | CPNE6    | a |        |        | CPNE3    |
| uc062lxl.1 | 0.00727313 down                                                                                                     | 3.096001  | -3.096001  | -1.6304059 | 0.01418335 | 0.04391168 | 98807910  | discoidin, CUB and LCCL domain containing 2 (chr3    | DCBLD2   | c |        | DCBLD1 |          |
| uc064ljz.1 | 0.00664018 down                                                                                                     | 1.44623   | -1.44623   | -0.5322971 | 1.3436074  | 1.9431655  | 26627214  | dihydropyrimidinase-like 2 (from HGNC DPYSL chr8     | DPYSL2   | a | DPYSL2 |        | DPYSL3   |
| uc063pfd.1 | 0.00451893 down                                                                                                     | 5.760368  | -5.760368  | -2.526161  | 0.03775852 | 0.21750295 | 56617199  | Dystonin. (from UniProt HOYAT7) chr6                 | DST      | o | DST    | *      |          |
| uc003wxt.4 | 0.00769938 down                                                                                                     | 2.4843318 | -2.4843318 | -1.3128579 | 0.05885801 | 0.14622281 | 17643803  | microtubule associated tumor suppressor 1 (chr8      | MTUS1    | a |        |        | MTUS2    |
| uc059zfb.1 | 0.00387835 down                                                                                                     | 5.238711  | -5.238711  | -2.389212  | 0.0739109  | 0.38719785 | 1468222   | myosin IC (from HGNC MYO1C) chr17                    | MYO1C    | e | MYO6   | MYO1E  | MYO1D    |
| uc004bve.4 | 0.0090192 down                                                                                                      | 1.2714772 | -1.2714772 | -0.3465056 | 0.6369028  | 0.8098074  | 128456918 | outer dense fiber of sperm tails 2 (ODF2). trar chr9 | ODF2     | e |        | ODF2L  | ODF2     |
| uc064wqo.1 | 0.001422 down                                                                                                       | 1.3874075 | -1.3874075 | -0.4723916 | 4.342514   | 6.0248365  | 131473593 | Proline Rich Coiled-Coil 2B. (from UniProt Q5J) chr9 | PRRC2B   | a | PRRC2B |        | PRRC2B   |
| uc001bse.3 | 0.00488237 down                                                                                                     | 3.3408244 | -3.3408244 | -1.7402041 | 0.07455237 | 0.24906638 | 30873134  | Syndecan 3 (SDC3). mRNA. (from RefSeq NM_ chr1       | SDC3     | o |        |        |          |

**Supplementary Table 10.****The expression of CardioDx transcripts in the Discovery Cohort quantified by RNAseq.**

| GeneName              | Gene expression in log2 RPKM |             | Symbol    | Description                                                            | RefSeq       |
|-----------------------|------------------------------|-------------|-----------|------------------------------------------------------------------------|--------------|
|                       | [LOW]                        | [MID+]      |           |                                                                        |              |
| uc010ugx.2            | 4.17                         | 4.14        | AQP9      | aquaporin 9                                                            | NM_020980    |
| uc010rva.2            | 0.01                         | 0.24        | CASP5     | caspase 5, apoptosis-related cysteine peptidase                        | NM_004347    |
| uc001pss.2            | 4.23                         | 3.93        | CD3D      | CD3d molecule, delta                                                   | NM_000732    |
| uc001quo.2            | 3.19                         | 3.15        | CLEC4E    | C-type lectin domain family 4, member E                                | NM_014358    |
| uc061sid.1            | 2.39                         | 2.70        | CXCR2     | chemokine (C-X-C motif) receptor 2                                     | NM_001168298 |
| uc002tbx.4            | 2.13                         | 2.11        | IL18RAP   | interleukin 18 receptor accessory protein                              | NM_003853    |
| uc001ovc.4            | 3.89                         | 4.00        | KCNE3     | potassium channel, voltage gated subfamily E regulatory beta subunit 3 | NM_005472    |
| uc001qye.4            | 2.12                         | 2.06        | KLRC4     | killer cell lectin-like receptor subfamily C, member 4                 | NM_013431    |
| uc003apy.5            | 2.91                         | 3.03        | NCF4      | neutrophil cytosolic factor 4, 40kDa                                   | NM_000631    |
| uc002qkv.4            | 1.08                         | 0.96        | RPL28     | ribosomal protein L28                                                  | NM_000991    |
| uc001fbr.2            | 5.56                         | 5.86        | S100A12   | S100 calcium binding protein A12                                       | NM_005621    |
| uc001fbs.3            | 8.68                         | 8.78        | S100A8    | S100 calcium binding protein A8                                        | NM_002964    |
| uc001fwq.5            | 0.06                         | 0.22        | SLAMF7    | SLAM family member 7                                                   | NM_021181    |
| uc004bjz.5            | 4.04                         | 3.98        | TLR4      | toll-like receptor 4                                                   | NM_138554    |
| uc002jup.3            | 2.86                         | 2.74        | TMC8      | transmembrane channel-like 8                                           | NM_152468    |
| uc002txk.3            | 2.69                         | 2.88        | TNFAIP6   | tumor necrosis factor, alpha-induced protein 6                         | NM_007115    |
| uc003xyc.4            | 5.34                         | 5.45        | TNFRSF10C | tumor necrosis factor receptor superfamily, member 10c, decoy          | NM_003841    |
| <b>Mean</b>           | <b>3.26</b>                  | <b>3.31</b> |           |                                                                        |              |
| <b>t test p value</b> | <b>0.94</b>                  |             |           |                                                                        |              |
